# Supplementary material for: A distal enhancer and an ultraconserved exon are derived from a novel retroposon
Source: Springer Nature journal article supplement (doi:10.1038/nature04696), 2006-04-16
Supplement: 41586_2006_BFnature04696_MOESM1_ESM.pdf [file 41586_2006_BFnature04696_MOESM1_ESM.pdf]

# An enhancer near *ISL1* and an ultraconserved *PCBP2* exon are derived from a novel retroposon

## SUPPORTING MATERIAL

Gill Bejerano<sup>1,\*</sup>, Craig Lowe<sup>1</sup>, Nadav Ahituv<sup>2,3</sup>, Bryan King<sup>1</sup>, Adam Siepel<sup>1</sup>,  
Sofie Salama<sup>1,4</sup>, Edward M. Rubin<sup>2,3</sup>, W. James Kent<sup>1</sup>, David Haussler<sup>1,4</sup>

<sup>1</sup>Center for Biomolecular Science and Engineering, University of California Santa Cruz,  
Santa Cruz, CA 95064, USA, <sup>2</sup>DOE Joint Genome Institute, Walnut Creek, CA 94598, USA,

<sup>3</sup>Genomics Division, Lawrence Berkeley National Laboratory, Berkeley, CA 94720, USA,

<sup>4</sup>Howard Hughes Medical Institute

24/02/06

## Contents

|                                 |    |
|---------------------------------|----|
| Supplementary Text . . . . .    | 2  |
| Supplementary Figures . . . . . | 13 |
| Supplementary Tables . . . . .  | 45 |

## Electronic Supplement

<http://www.cse.ucsc.edu/~jill/sine.html>

---

\*Corresponding author: Tel: +1 831 459 5232 Fax: +1 831 459 1809 e-mail: [jill@soe.ucsc.edu](mailto:jill@soe.ucsc.edu) (G.B.)

## S1 Coelacanth Retroposon

We used Blastn (Altschul *et al.*, 1997) to search the NCBI nucleotide database for sequences similar to the ultraconserved element uc.338 (Bejerano *et al.*, 2004b), which contains an alternatively spliced exon of PCBP2. This search returned significant hits to eight BACs from the Indonesian coelacanth, *Latimeria menadoensis*. We used Blastz (Schwartz *et al.*, 2003) to assemble five overlapping BACs. The resulting 1Mb of non-overlapping genomic sequence was compared to itself. This revealed that the repeat family, containing a sequence similar to that of uc.338, had 59 members, with pairwise identities between 40–87% (Table S1). A density of 60 copies/Mb is comparable with active SINE families found in other, fully sequenced vertebrate genomes (Kazazian, 2004), and would extrapolate to about  $10^5$  copies with current estimates of the coelacanth genome size at 2-3Gb (Danke *et al.*, 2004). The longest self-alignments overlapping our sequence of interest never exceeded 480bp, which suggested the length of the repeat may be close to this number. The proposed length was further supported by one family member being inserted into an open reading frame of a LINE. This insertion left a similar sized gap in the alignment when Blastx (Altschul *et al.*, 1997) was used to map a known reverse transcriptase onto the LINE.

We used MUSCLE (Edgar, 2004) to construct a multiple alignment of all occurrences of the repeat in *Latimeria menadoensis*. Columns with a high percentage of gaps were removed, as these columns most likely do not represent the position of an ancestral base. We ran PhyloFit (Siepel *et al.*, 2005) on the trimmed multiple alignment using a neighbor-joining guide tree obtained from MUSCLE to find the most likely ancestral sequence (Fig. S2).

We oriented the reconstructed sequence by sequence similarity to a vertebrate Serine tRNA at one end. This end conserves the sequence and spacing of the A and B boxes that act as a Pol III promoter (Gilbert and Labuda, 1999). The other end has a distinct poly-A tail (Fig. 1). This organization is typical of SINEs, as detailed in the main text.

We used a local alignment tool (Pearson *et al.*, 1997) to search the regions immediately flanking the 59 coelacanth instances for evidence of target site duplication (TSD). Indeed, the two instances closest to the coelacanth consensus exhibit clear candidates: AAACACAGCAAAGTCA, a perfectly conserved 16-mer on both flanks of the most similar instance, and AAAATTTAAAGAAA[C/T]ATG, a near perfectly conserved 18-mer on both flanks of the second instance. Putative decayed TSDs were detected flanking other instances. The two long matches exactly flanking the top instances suggest that these sequences underwent target primed reverse transcription, by hijacking the machinery of a LINE, similar to the relationship between Alus and L1s in the human genome (Ostertag and Kazazian, 2001). It also reaffirms our confidence that the characterized sequence is indeed a SINE, that we have it at its accurate length, and that this SINE has been recently active in coelacanth.

Using Blastz we determined that the reconstructed coelacanth SINE has no significant similarity to any known SINE, or other sequence found in Repbase (Jurka, 2000). We could find no similarity to the 3' end of any characterized LINE in Repbase or to any putative LINE-like repeat present in the 1Mb of sequence from *Latimeria menadoensis*. Mapping the coelacanth SINE to the human genome (below) we found minimal overlap with the 49% of the genome masked by RepeatMasker (Smit and Green, 2005) as known genomic repeats. We conclude that this is a novel repeat, and term it the LF-SINE, for lobe-finned fishes (or “living

fossil”) SINE.

Once copies of the LF-SINE were detected in tetrapods, we tested the stability of our reconstruction by using all copies of the LF-SINE in the Indonesian coelacanth as well as outgroup sequences from frog, chicken, possum, mouse, rat, dog, chimp, and human. The addition of outgroups and the use of a maximum likelihood tree topology from PHYLIP (Felsenstein, 1995) for the coelacanth instances changed the identity of only 15 bases (Fig. S14), attesting to the remarkable stability of LF-SINE instances over vertebrate evolution. This suggests that our reconstruction is very close to the sequence of the actual progenitor coelacanth SINE. The maximum-likelihood tree of Fig. 1c was generated using SEMPHY (Friedman *et al.*, 2002) with default parameters for model and transitions/transversions, and an unconstrained topology.

The taxonomy of ancient SINEs is still largely unknown. It is still undecided whether ancient SINE families were each generated anew from different fortuitous tRNA retropositions (Ogiwara *et al.*, 2002), or if they all share some deep common ancestry (Gilbert and Labuda, 1999). Previous work has defined a 65bp “core” region of similarity, adjacent to the 5’ tRNA derived region shared by many SINE families. As little as 50% sequence identity over 44/65 core bases was defined sufficient to deem all SINEs passing this threshold as descendants of a common proto CORE-SINE (Gilbert and Labuda, 1999). We note that the CORE-SINEs as defined (Gilbert and Labuda, 1999, 2000), the V-SINEs (Ogiwara *et al.*, 2002), and our LF-SINE, all share this weak signal (Fig. S13), apparently missing from the recently discovered DeuSINEs (Nishihara *et al.*, 2006). However, we contend that more work is required, before this weak signal, detected prior to the availability of any vertebrate genome sequence, can be taken as proof of common descent.

## S2 Genomic Distribution

Genomic assemblies of 19 different organisms were searched for instances of the LF-SINE (listed in Table S2). The same assemblies are subsequently used throughout this work. Blastz was used to search the reconstructed sequence in Fig. S2 against the unmasked genome draft sequences. We used a stringent score threshold of 5,500, which, given a thousand different shuffles of the input sequence, retrieved no random hits to the unmasked human genome. Where the genomic draft is already at the chromosome level, we discarded all matches outside the golden path assembly of the chromosomes, to avoid contamination. See the electronic supplement at <http://www.cse.ucsc.edu/~jill/sine.html> for instance lists directly linked to the UCSC genome browser (Hinrichs *et al.*, 2006).

We also searched for the coelacanth sequence in the Trace Archive (<http://www.ncbi.nlm.nih.gov/Traces>), using megablast (McGinnis and Madden, 2004), and in the EMBL nucleotide database (Kanz *et al.*, 2005) using WU-BLAST (Lopez *et al.*, 2003).

## S3 Neutral evolution

To simulate neutral decay of LF-SINE instances we used a reversible rate matrix estimated from placental mammalian ancestral repeats (Siepel *et al.*, 2005), and microindels of up to 10 bases at a rate of 5% of the point substitution rate (Cooper *et al.*, 2004), estimated from genome-wide human, mouse and rat alignments. We used these models to generate neutrally evolving LF-SINE instances at increasing branch lengths between

0 and 2 substitutions per site, at increments of 0.01. At each branch length we generated  $10^6$  decayed sequences, and then attempted to detect them using Blastz, parameterized as in Text S2. Compared to a species tree (Fig. S4) estimated from four-fold degenerate codon positions between available genome drafts (Margulies *et al.*, 2005), the results shown in Fig. S5 predict that, ignoring larger scale rearrangements and repeat expansion, single-copy neutrally evolving human genomic DNA can often be matched to its ortholog in current mammalian genome drafts up to 0.6 subst./site away, but it can seldom be traced in chicken, and never in frog or beyond. These predictions are in good correspondence with current genome-wide comparisons of these organisms (International Mouse Genome Sequencing Consortium, 2002; International Rat Genome Sequencing Consortium, 2004; International Chicken Genome Sequencing Consortium, 2004; International Tetraodon Genome Sequencing Consortium, 2004).

To examine whether the actual human instances we observe have evolved neutrally, we used the liftOver utility at the UCSC genome browser to align orthologous LF-SINE instances from chimp, macaque, mouse, rat, dog, possum, chicken and frog, where available, to each human instance. Rare cases where two or more human instances were matched to the same region in a second species were resolved manually. We then used phyloP from the phast package (Siepel *et al.*, 2005), with the same reversible rate matrix and species tree of Fig. S4 to estimate how well the observed multiple alignments match our neutral evolution model. Even when treating the alignments conservatively, and setting a strict threshold of  $p < 0.05$  after Bonferroni correction, more than half the alignment blocks (137/245) clearly evolve slower than neutral evolution dictates.

## S4 Human Instances

We performed several *in silico* tests in search of cellular role hypotheses for the human LF-SINE instances:

Energy based mfold prediction (Zuker, 2003) suggests a stable RNA secondary structure for the coelacanth SINE (Fig. S3) and a few of the human instances (Table S9). However, comparison of these instances failed to detect structure preserving substitutions in the human genome. According to the UCSC genome browser, only 10/163 intergenic instances overlap, even partially, any mature RNA transcript (EST/cDNA), mostly at or immediately downstream of the 3' end of a longer, spliced transcript. Additional 19 intergenic instances overlap the recent 5nt resolution transcriptional maps of 10 human chromosomes in 8 cell lines (Cheng *et al.*, 2005). None of these overlap inferred transcripts matching the expected retroposon length. Human LF-SINE instances do not overlap known small RNAs, micro-RNA precursors, or putative RNA editing events (Blow *et al.*, 2004; Kim *et al.*, 2004; Levanon *et al.*, 2004). In particular, intronic instances are evenly distributed as sense (35) and antisense (33) with the host gene, none of which overlap a known antisense transcript to the host gene.

However, human LF-SINE instances tend to co-cluster (Fig. S6). An instance is almost three times as likely to appear within 1Mb of another LF-SINE instance as if the instances were randomly distributed within each chromosome ( $p < 10^{-5}$ ), suggesting the kind of synergy often observed between enhancers, distal cis-regulatory regions found up to 1Mb away from their target genes (Levine and Tjian, 2003). The instances also tend to cluster within 1Mb of ultraconserved elements (Fig. S7). Almost 10% of LF-SINEs in the human genome are within 200kb of an ultraconserved element and close to 30% are within 1Mb ( $p < 10^{-5}$ ). To simulate a random distribution, bases in the human genome were randomly picked to be the first base of

an element. If a selection fell within a gap of the hg17 assembly, another base was randomly selected. We ran two variants of this simulation. The first variant placed instances randomly in the genome. The second placed instances randomly in each chromosome so that the number of instances per chromosome in the simulation would equal that of the LF-SINE (Table S5). The quantitative results in both scenarios were similar, and we discuss hereafter only the latter. For the self-clustering we calculated the distance from the first base of an LF-SINE instance to the first base of the next LF-SINE in the genome. This yields  $n - 1$  distances for  $n$  occurrences on any given chromosome. Similar distances were recorded from each LF-SINE instance to the nearest ultraconserved (UC) element on the same chromosome. This yields  $n$  distances for  $n$  occurrences of the LF-SINE, except on chr. 21 which has 3 LF-SINE instances but no UC elements. The hg17 genomic coordinates of the UC elements were obtained from the electronic supplement of Bejerano *et al.* (2004b), at <http://www.soe.ucsc.edu/~jill/ultra.html>.

About a dozen ultraconserved elements have already been confirmed, and many more are suspected of overlapping distal enhancers of transcription factors involved in development (Nobrega *et al.*, 2003; Bejerano *et al.*, 2004b; Woolfe *et al.*, 2005; Ellingsen *et al.*, 2005). Indeed, we find non-exonic LF-SINE instances overlapping or within 1Mb of 35 genes annotated for transcription factor activity ( $p = 2.8 \cdot 10^{-6}$ ). Additional instances are found near 24 genes involved in cell adhesion ( $p = 7.3 \cdot 10^{-7}$ ) and overlapping or near 15 proteins all carrying the fibronectin type III repeat region, common among cell surface binding and receptor proteins ( $p = 3.3 \cdot 10^{-6}$ ). These findings suggest that LF-SINE instances may be involved in neuronal development. The annotation enrichment p-values are computed against a null model comparing the GO (Ashburner *et al.*, 2000) and InterPro (Mulder *et al.*, 2005) annotations of a given set of genes, with their genome-wide distribution. To perform these tests we collected all GO and InterPro annotations available at the UCSC genome browser, and computed a hyper geometric p-value for each attribute in the set vs. its genome-wide distribution in all annotated gene loci in the UCSC known genes track, as of June 2005. All p-values we reported above remain highly significant ( $p < 0.005$ ) after Bonferroni correction.

## S5 Exonized Instances

All exonization events use the canonical GT/AG splice signals (Table S7, Fig. S10). However, they insert in all three possible reading frames, and use several different splice sites compared to the coelacanth SINE (Fig. S9). Bases 381 and 289 are the most common 3' and 5' splice site combination in the known human cases (Table S8). This combination, in which the consensus splice site bases are already found in the coelacanth SINE, is also shown in Fig. 1 with respect to PCBP2. The region around the preferable 3' splice site at base 381 is highly similar to its equivalent in exonized instances of the Alu-J primate specific SINE subfamily (Lev-Maor *et al.*, 2003). Both have a run of pyrimidines followed by proximal and distal AG splice sites, which will be in competition and may aid in alternative splicing of the exon. In particular, the sequences surrounding the potential splice sites for both SINEs differ by a single base insertion:

LF-SINE: AGAACAGG (bases 383-376)

Alu-J : AGA-CAGG (bases 281-275)

```

      ||  ||
proximal  distal

```

In the Alu-J family, this splice site regulatory sequence is often preceded by a G (at pos. 282), coupled with a strong preference for the distal AG (Lev-Maor *et al.*, 2003). In contrast, in exapted LF-SINE instances the sequence is preceded by a C (pos. 384), showing preference for the proximal AG (Fig. S9, page 20). There is no apparent similarity to the 5' splice site in the Alus beyond the canonical bases.

Interestingly, in the coelacanth sequence of Fig. S2 (as well as in its Fig. S14 variant) the 93 bases spanned by the most common 381/289 splice site combination (Table S8) is free of stop codons in all three reading frames of the SINE reverse strand (which is invariably used in all exonizations we detected). Supporting this observation we find that all six exons that do not insert a stop codon into the reading frame (with the exception of the 5' splice site of KIAA1409) use this splice site combination. In contrast only two exons that use this splice site combination do introduce a stop codon (Table S7, S8). This capacity may make the LF-SINE prone to rapid exonization, following integration in a favourable genomic location, generating a novel coding exon. This exon may then be subjected to positive selection, followed by negative selection, as it acquired a cellular role (Long *et al.*, 2003). To assess the significance of this finding we generated  $10^7$  sequences of 481bp from a first-order Markov model trained on the 1Mb of available coelacanth sequence. In each of these sequences we searched for a stretch of 93bp or longer, stop codon free in all three frames, and flanked by the GGT/AG splice sites. The simulation indicates that this event is rare,  $p \sim 0.002$ , in random coelacanth-like sequence.

A Blastx (Altschul *et al.*, 1997) of this region against the NCBI protein database (nr) retrieved two additional candidate exonized instances: An alternatively-spliced exon of human PTGER3, and an unannotated exon of chicken PRDM5 homolog (weak *E*-value is strengthened in both cases by the fact that we match a discrete exon while comparing in protein space). Expanding the Blastx to search all frames of the entire LF-SINE we find a single additional, strong hit to a predicted exon of chicken EMSY homolog, which is out of the golden path in the current chicken genome draft, and was thus excluded from our screen (Fig. S11).

Nonsense-mediated decay (Table S7) was predicted in 11/17 coding instances where the insertion of an LF-SINE exon causes a stop codon to appear more than 50 nucleotides upstream of the final splice junction. These transcripts are almost always quickly degraded in eukaryotes (Lewis *et al.*, 2003).

We found three human single nucleotide polymorphisms (SNPs) in exonized instances of the LF-SINE in dbSNP (Sherry *et al.*, 2001). Two are in the alternatively-spliced exon of PCBP2 (rs11556936, rs11556932). However, these SNPs have not been validated and the sequence reported as flanking the polymorphism does not align well to the human genome. The third, and only validated SNP (rs4905082), in KIAA1409, is a silent wobble position transition that does not change the identity of the encoded amino acid.

PCBP2 encodes a poly-C binding protein, containing three instances of the RNA binding KH domain. Members of this family are involved in many biological processes including mRNA stabilization, translational silencing and enhancement, and various aspects of mRNA expression (Makeyev and Liebhaber, 2002). PCBP2 was shown in mice to have distinct intercellular expression and intracellular accumulation patterns (Hidai *et al.*, 2003; McKee *et al.*, 2005). It expresses two major isoforms, differing only by including or excluding the LF-SINE-derived exon, which is located in an unannotated region between the second and third KH domains. Recent *in vitro* work has shown that the isoform including the LF-SINE-derived exon is localized to the nucleus, while the isoform excluding it is found both in the nucleus and cytoplasm, suggesting that the exon may harbor a nuclear retention signal (Chkheidze and Liebhaber, 2003). This exon may also

be involved in dimerization with itself and other hnRNP proteins (Kim *et al.*, 2000), and post-transcriptional auto-regulation (Waggoner and Liebhaber, 2003).

It was recently shown (Gunduz *et al.*, 2005) that SMARCA4 (also called BRG1), a member of the SWI/SNF complex and a candidate tumor suppressor gene in several human cancers, is generally up-regulated in oral cancer, but the isoform containing the LF-SINE-derived exon is extremely decreased or lost in most tumor samples. In another recent study, of LRP1B (Li *et al.*, 2005), a low density lipoprotein (LDL) receptor-related protein and also a candidate tumor suppressor gene, the isoforms including and omitting the LF-SINE-derived exon were shown to express differently in human and mouse.

LRP1B is one of three LF-SINE instances most conserved between mammals, bird and amphibian. The other two being the novel ISL1 enhancer, and an instance which according to mouse ESTs is embedded in the 3' UTR of HHIP, or hedgehog interacting protein. Interestingly all three proteins may be involved in hedgehog signalling and/or pancreatic development. HHIP is a known member of the hedgehog signalling network. LRP2 (also megalin), which is closely related to LRP1B (May and Herz, 2003), is also known, and ISL1 is suspected of being involved in this network too (Cohen, 2003). ISL1 is also an important factor in pancreatic development (Habener *et al.*, 2005), as are HHIP (Kawahira *et al.*, 2003) and LRP5 (Fujino *et al.*, 2003), which is more distantly related to LRP1B (May and Herz, 2003).

## S6 Similar Families

Previously, we have shown that thousands of paralog families exist within the conserved non coding portion of the human genome (Bejerano *et al.*, 2004a, <http://www.cse.ucsc.edu/~jill/dark.html>). That screen however combined paralogs found in much larger matching genomic contexts (e.g., conserved non coding regions that duplicated along with new members of a gene family) with paralogous matches with little or no flanking context (such as would be the case for retroposition exaptation events).

To estimate the frequency of detectable SINE-like exaptation events in the human genome, we performed two screens, in search of genomic elements, known or suspected as functional, that have multiple short paralogous matches elsewhere within the human genome. In the first screen we attempted to find multiple short paralogous matches that overlap and extend into the intronic region flanking short exons (similar to Fig. S1). Of the retrieved set we estimate that dozens, possibly more, exons are similar to short genomic regions unrelated to family members, recent duplications, and retrogenes of the respective host gene (e.g., Fig. S12). The second screen focused on the top 2% multi-species conserved elements in the human genome. From these we removed all known exons, RNA genes, retrogenes, repeats and elements lying in recent segmental duplication regions. In the remainder of highly conserved uncharacterized elements we estimate that hundreds, or more, elements have multiple short matches elsewhere in the genome. Work is in progress to refine these screens to produce putative exapted candidates for further analysis.

## References

- Altschul, S. F., Madden, T. L., Schaffer, A. A., Zhang, J., Zhang, Z., Miller, W. and Lipman, D. J. (1997) Gapped BLAST and PSI-BLAST: a new generation of protein database search programs. *Nucleic Acids*

- Res*, **25**, 3389–3402.
- Ashburner, M., Ball, C. A., Blake, J. A., Botstein, D., Butler, H., Cherry, J. M., Davis, A. P., Dolinski, K., Dwight, S. S., Eppig, J. T., Harris, M. A., Hill, D. P., Issel-Tarver, L., Kasarskis, A., Lewis, S., Matese, J. C., Richardson, J. E., Ringwald, M., Rubin, G. M. and Sherlock, G. (2000) Gene ontology: tool for the unification of biology. The Gene Ontology Consortium. *Nat Genet*, **25**, 25–29.
- Bejerano, G., Haussler, D. and Blanchette, M. (2004a) Into the heart of darkness: large-scale clustering of human non-coding DNA. *Bioinformatics*, **20**, i40–i48.
- Bejerano, G., Pheasant, M., Makunin, I., Stephen, S., Kent, W. J., Mattick, J. S. and Haussler, D. (2004b) Ultraconserved elements in the human genome. *Science*, **304**, 1321–1325.
- Blow, M., Futreal, P. A., Wooster, R. and Stratton, M. R. (2004) A survey of RNA editing in human brain. *Genome Res*, **14**, 2379–2387.
- Cheng, J., Kapranov, P., Drenkow, J., Dike, S., Brubaker, S., Patel, S., Long, J., Stern, D., Tammana, H., Helt, G., Sementchenko, V., Piccolboni, A., Bekiranov, S., Bailey, D. K., Ganesh, M., Ghosh, S., Bell, I., Gerhard, D. S. and Gingeras, T. R. (2005) Transcriptional maps of 10 human chromosomes at 5-nucleotide resolution. *Science*, **308**, 1149–1154.
- Chkheidze, A. N. and Liebhaber, S. A. (2003) A novel set of nuclear localization signals determine distributions of the alphaCP RNA-binding proteins. *Mol Cell Biol*, **23**, 8405–8415.
- Cohen, M. M., Jr. (2003) The hedgehog signaling network. *Am J Med Genet A*, **123**, 5–28.
- Cooper, G. M., Brudno, M., Stone, E. A., Dubchak, I., Batzoglou, S. and Sidow, A. (2004) Characterization of evolutionary rates and constraints in three Mammalian genomes. *Genome Res*, **14**, 539–548.
- Crooks, G. E., Hon, G., Chandonia, J.-M. and Brenner, S. E. (2004) WebLogo: a sequence logo generator. *Genome Res*, **14**, 1188–1190.
- Danke, J., Miyake, T., Powers, T., Schein, J., Shin, H., Bosdet, I., Erdmann, M., Caldwell, R. and Amemiya, C. T. (2004) Genome resource for the Indonesian coelacanth, *Latimeria menadoensis*. *J Exp Zool A Comp Exp Biol*, **301**, 228–234.
- Edgar, R. C. (2004) MUSCLE: multiple sequence alignment with high accuracy and high throughput. *Nucleic Acids Res*, **32**, 1792–1797.
- Ellingsen, S., Laplante, M. A., Konig, M., Kikuta, H., Furmanek, T., Hoivik, E. A. and Becker, T. S. (2005) Large-scale enhancer detection in the zebrafish genome. *Development*, **132**, 3799–3811.
- Felsenstein, J. (1995) <http://evolution.genetics.washington.edu/phylog.html>. Version 3.5c.
- Friedman, N., Ninio, M., Pe’er, I. and Pupko, T. (2002) A structural EM algorithm for phylogenetic inference. *J Comput Biol*, **9**, 331–353.



- Fujino, T., Asaba, H., Kang, M.-J., Ikeda, Y., Sone, H., Takada, S., Kim, D.-H., Ioka, R. X., Ono, M., Tomoyori, H., Okubo, M., Murase, T., Kamataki, A., Yamamoto, J., Magoori, K., Takahashi, S., Miyamoto, Y., Oishi, H., Nose, M., Okazaki, M., Usui, S., Imaizumi, K., Yanagisawa, M., Sakai, J. and Yamamoto, T. T. (2003) Low-density lipoprotein receptor-related protein 5 (LRP5) is essential for normal cholesterol metabolism and glucose-induced insulin secretion. *Proc Natl Acad Sci U S A*, **100**, 229–234.
- Gilbert, N. and Labuda, D. (1999) CORE-SINEs: eukaryotic short interspersed retroposing elements with common sequence motifs. *Proc Natl Acad Sci U S A*, **96**, 2869–2874.
- Gilbert, N. and Labuda, D. (2000) Evolutionary inventions and continuity of CORE-SINEs in mammals. *J Mol Biol*, **298**, 365–377.
- Gunduz, E., Gunduz, M., Ouchida, M., Nagatsuka, H., Beder, L., Tsujigiwa, H., Fukushima, K., Nishizaki, K., Shimizu, K. and Nagai, N. (2005) Genetic and epigenetic alterations of BRG1 promote oral cancer development. *Int J Oncol*, **26**, 201–210.
- Habener, J. F., Kemp, D. M. and Thomas, M. K. (2005) Minireview: transcriptional regulation in pancreatic development. *Endocrinology*, **146**, 1025–1034.
- Hidai, C., Ohno, M., Kazama, H., Ikeda, H., Kasanuki, H., Kokubun, S. and Kawana, M. (2003) Specific regulation of nucleocytoplasmic distribution of poly(C)-binding protein gene mRNA in mouse development. *Biochem Biophys Res Commun*, **309**, 339–343.
- Hinrichs, A. S., Karolchik, D., Baertsch, R., Barber, G. P., Bejerano, G., Clawson, H., Diekhans, M., Furey, T. S., Harte, R. A., Hsu, F., Hillman-Jackson, J., Kuhn, R. M., Pedersen, J. S., Pohl, A., Raney, B. J., Rosenbloom, K. R., Siepel, A., Smith, K. E., Sugnet, C. W., Sultan-Qurraie, A., Thomas, D. J., Trumbower, H., Weber, R. J., Weirauch, M., Zweig, A. S., Haussler, D. and Kent, W. J. (2006) The UCSC Genome Browser Database: update 2006. *Nucleic Acids Res*, **34**, 590–598.
- International Chicken Genome Sequencing Consortium (2004) Sequence and comparative analysis of the chicken genome provide unique perspectives on vertebrate evolution. *Nature*, **432**, 695–716.
- International Mouse Genome Sequencing Consortium (2002) Initial sequencing and comparative analysis of the mouse genome. *Nature*, **420**, 520–562.
- International Rat Genome Sequencing Consortium (2004) Genome sequence of the Brown Norway rat yields insights into mammalian evolution. *Nature*, **428**, 493–521.
- International Tetraodon Genome Sequencing Consortium (2004) Genome duplication in the teleost fish *Tetraodon nigroviridis* reveals the early vertebrate proto-karyotype. *Nature*, **431**, 946–957.
- Jurka, J. (2000) Repbase update: a database and an electronic journal of repetitive elements. *Trends Genet*, **16**, 418–420.
- Kanz, C., Aldebert, P., Althorpe, N., Baker, W., Baldwin, A., Bates, K., Browne, P., van den Broek, A., Castro, M., Cochrane, G., Duggan, K., Eberhardt, R., Faruque, N., Gamble, J., Diez, F. G., Harte, N.,

- Kulikova, T., Lin, Q., Lombard, V., Lopez, R., Mancuso, R., McHale, M., Nardone, F., Silventoinen, V., Sobhany, S., Stoehr, P., Tuli, M. A., Tzouvara, K., Vaughan, R., Wu, D., Zhu, W. and Apweiler, R. (2005) The EMBL Nucleotide Sequence Database. *Nucleic Acids Res*, **33**, 29–33.
- Kawahira, H., Ma, N. H., Tzanakakis, E. S., McMahon, A. P., Chuang, P.-T. and Hebrok, M. (2003) Combined activities of hedgehog signaling inhibitors regulate pancreas development. *Development*, **130**, 4871–4879.
- Kazazian, H. H., Jr. (2004) Mobile elements: drivers of genome evolution. *Science*, **303**, 1626–1632.
- Kent, W. J., Baertsch, R., Hinrichs, A., Miller, W. and Haussler, D. (2003) Evolution’s cauldron: duplication, deletion, and rearrangement in the mouse and human genomes. *Proc Natl Acad Sci U S A*, **100**, 11484–11489.
- Kim, D. D. Y., Kim, T. T. Y., Walsh, T., Kobayashi, Y., Matise, T. C., Buyske, S. and Gabriel, A. (2004) Widespread RNA editing of embedded alu elements in the human transcriptome. *Genome Res*, **14**, 1719–1725.
- Kim, J. H., Hahm, B., Kim, Y. K., Choi, M. and Jang, S. K. (2000) Protein-protein interaction among hnRNPs shuttling between nucleus and cytoplasm. *J Mol Biol*, **298**, 395–405.
- Lev-Maor, G., Sorek, R., Shomron, N. and Ast, G. (2003) The birth of an alternatively spliced exon: 3’ splice-site selection in Alu exons. *Science*, **300**, 1288–1291.
- Levanon, E. Y., Eisenberg, E., Yelin, R., Nemzer, S., Hallegger, M., Shemesh, R., Fligelman, Z. Y., Shoshan, A., Pollock, S. R., Sztybel, D., Olshansky, M., Rechavi, G. and Jantsch, M. F. (2004) Systematic identification of abundant A-to-I editing sites in the human transcriptome. *Nat Biotechnol*, **22**, 1001–1005.
- Levine, M. and Tjian, R. (2003) Transcription regulation and animal diversity. *Nature*, **424**, 147–151.
- Lewis, B. P., Green, R. E. and Brenner, S. E. (2003) Evidence for the widespread coupling of alternative splicing and nonsense-mediated mRNA decay in humans. *Proc Natl Acad Sci U S A*, **100**, 189–192.
- Li, Y., Lu, W. and Bu, G. (2005) Striking differences of LDL receptor-related protein 1B expression in mouse and human. *Biochem Biophys Res Commun*, **333**, 868–873.
- Long, M., Betran, E., Thornton, K. and Wang, W. (2003) The origin of new genes: glimpses from the young and old. *Nat Rev Genet*, **4**, 865–875.
- Lopez, R., Silventoinen, V., Robinson, S., Kibria, A. and Gish, W. (2003) WU-Blast2 server at the European Bioinformatics Institute. *Nucleic Acids Res*, **31**, 3795–3798.
- Makeyev, A. V. and Liebhaber, S. A. (2002) The poly(C)-binding proteins: a multiplicity of functions and a search for mechanisms. *RNA*, **8**, 265–278.
- Margulies, E. H., Maduro, V. V. B., Thomas, P. J., Tomkins, J. P., Amemiya, C. T., Luo, M. and Green, E. D. (2005) Comparative sequencing provides insights about the structure and conservation of marsupial and monotreme genomes. *Proc Natl Acad Sci U S A*, **102**, 3354–3359.

- May, P. and Herz, J. (2003) LDL receptor-related proteins in neurodevelopment. *Traffic*, **4**, 291–301.
- McGinnis, S. and Madden, T. L. (2004) BLAST: at the core of a powerful and diverse set of sequence analysis tools. *Nucleic Acids Res*, **32**, 20–25.
- McKee, A., Minet, E., Stern, C., Riahi, S., Stiles, C. and Silver, P. (2005) A genome-wide in situ hybridization map of RNA-binding proteins reveals anatomically restricted expression in the developing mouse brain. *BMC Dev Biol*, **5**, 14.
- Mulder, N. J., Apweiler, R., Attwood, T. K., Bairoch, A., Bateman, A., Binns, D., Bradley, P., Bork, P., Bucher, P., Cerutti, L., Copley, R., Courcelle, E., Das, U., Durbin, R., Fleischmann, W., Gough, J., Haft, D., Harte, N., Hulo, N., Kahn, D., Kanapin, A., Krestyaninova, M., Lonsdale, D., Lopez, R., Letunic, I., Madera, M., Maslen, J., McDowall, J., Mitchell, A., Nikolskaya, A. N., Orchard, S., Pagni, M., Ponting, C. P., Quevillon, E., Selengut, J., Sigrist, C. J. A., Silventoinen, V., Studholme, D. J., Vaughan, R. and Wu, C. H. (2005) InterPro, progress and status in 2005. *Nucleic Acids Res*, **33**, 201–205.
- Nishihara, H., Smit, A. and Okada, N. (2006) Functional non-coding sequences derived from sines in the human genome. *Genome Res*, p. Submitted.
- Nobrega, M. A., Ovcharenko, I., Afzal, V. and Rubin, E. M. (2003) Scanning human gene deserts for long-range enhancers. *Science*, **302**, 413.
- Ogiwara, I., Miya, M., Ohshima, K. and Okada, N. (2002) V-SINEs: a new superfamily of vertebrate SINEs that are widespread in vertebrate genomes and retain a strongly conserved segment within each repetitive unit. *Genome Res*, **12**, 316–324.
- Ostertag, E. M. and Kazazian, H. H., Jr. (2001) Biology of mammalian L1 retrotransposons. *Annu Rev Genet*, **35**, 501–538.
- Pearson, W. R., Wood, T., Zhang, Z. and Miller, W. (1997) Comparison of DNA sequences with protein sequences. *Genomics*, **46**, 24–36.
- Schwartz, S., Kent, W. J., Smit, A., Zhang, Z., Baertsch, R., Hardison, R. C., Haussler, D. and Miller, W. (2003) Human-mouse alignments with BLASTZ. *Genome Res*, **13**, 103–107.
- Sherry, S. T., Ward, M. H., Kholodov, M., Baker, J., Phan, L., Smigielski, E. M. and Sirotkin, K. (2001) dbSNP: the NCBI database of genetic variation. *Nucleic Acids Res*, **29**, 308–311.
- Siepel, A., Bejerano, G., Pedersen, J. S., Hinrichs, A. S., Hou, M., Rosenbloom, K., Clawson, H., Spieth, J., Hillier, L. W., Richards, S., Weinstock, G. M., Wilson, R. K., Gibbs, R. A., Kent, W. J., Miller, W. and Haussler, D. (2005) Evolutionarily conserved elements in vertebrate, insect, worm, and yeast genomes. *Genome Res*, **15**, 1034–1050.
- Smit, A. and Green, P. (2005) <http://ftp.genome.washington.edu/RM/RepeatMasker.html>.

- Uemura, O., Okada, Y., Ando, H., Guedj, M., Higashijima, S.-I., Shimazaki, T., Chino, N., Okano, H. and Okamoto, H. (2005) Comparative functional genomics revealed conservation and diversification of three enhancers of the *isl1* gene for motor and sensory neuron-specific expression. *Dev Biol*, **278**, 587–606.
- Waggoner, S. A. and Liebhaber, S. A. (2003) Identification of mRNAs associated with alphaCP2-containing RNP complexes. *Mol Cell Biol*, **23**, 7055–7067.
- Woolfe, A., Goodson, M., Goode, D. K., Snell, P., McEwen, G. K., Vavouri, T., Smith, S. F., North, P., Callaway, H., Kelly, K., Walter, K., Abnizova, I., Gilks, W., Edwards, Y. J. K., Cooke, J. E. and Elgar, G. (2005) Highly conserved non-coding sequences are associated with vertebrate development. *PLoS Biol*, **3**, e7.
- Zuker, M. (2003) Mfold web server for nucleic acid folding and hybridization prediction. *Nucleic Acids Res*, **31**, 3406–3415.

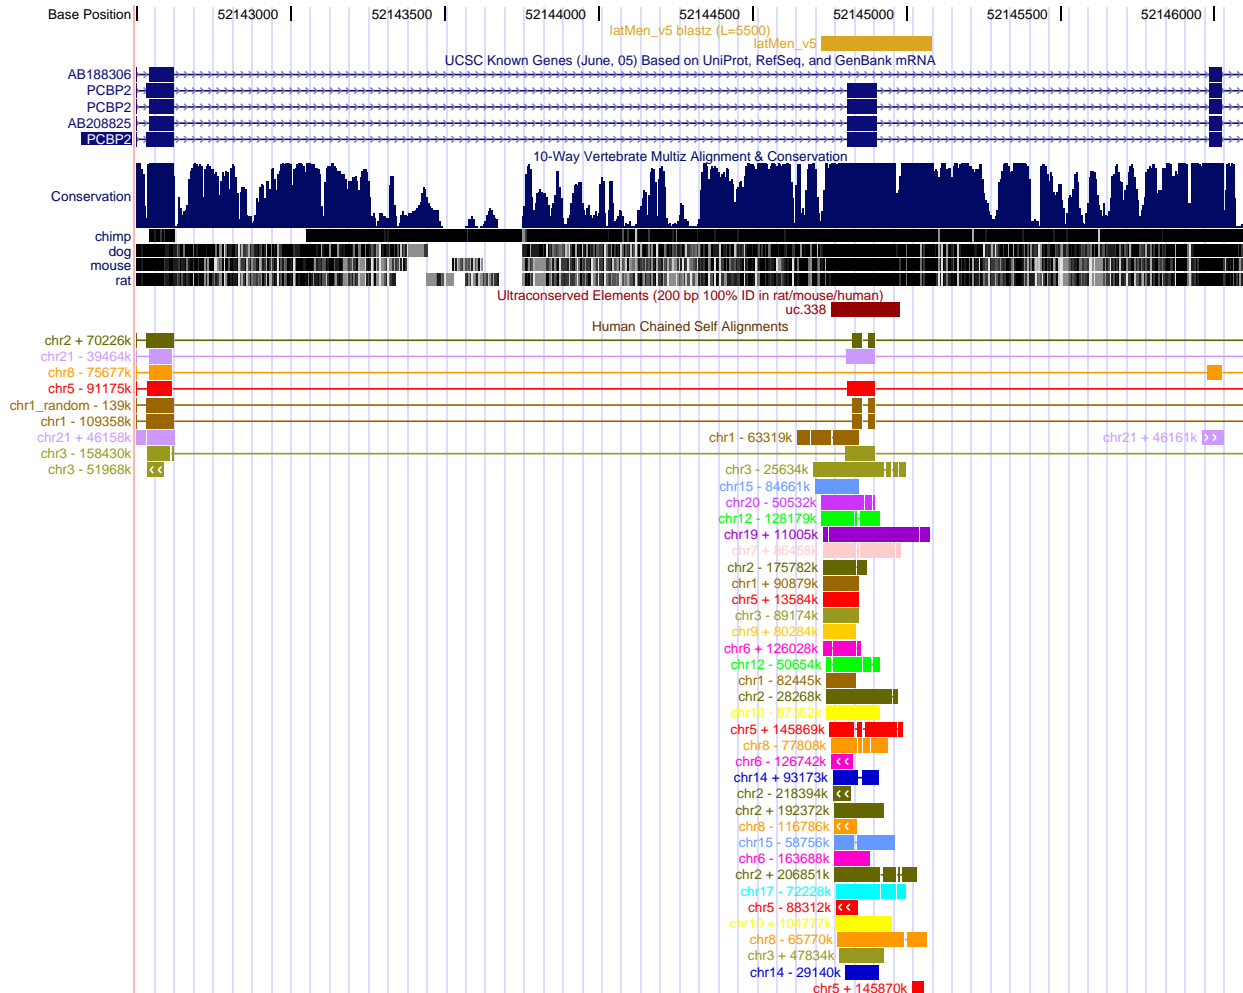

Figure S1: **Distinctive accumulation of short human paralogs to the PCBP2 exonized instance containing uc.338.** A UCSC genome browser shot (<http://genome.ucsc.edu>) of the PCBP2 exonized instance and the two exons flanking it (3.6kb region). Tracks (top to bottom) show: The region conserved with coelacanth; PCBP2 (whole and fragmented) isoforms, showing the alternatively-spliced nature of the exonization event; Multi-species conservation track (Siepel *et al.*, 2005); Location of uc.338 within the exapted SINE; Chained (Kent *et al.*, 2003) human paralogs to this genomic region. The top seven paralogs conserve, alongside the exonized instance, other portions of PCBP2. All are PCBP2 retro-genes, of which the top (on chr. 2) is PCBP1, a functional retroposed copy of PCBP2 (Makeyev and Liebhaber, 2002). All other paralogs, similar to the exonized SINE alone, are other human instances of the LF-SINE.

```

>LF-SINE
GGGACTGGATGGCTCAGTGAATTGGTAATGGGATATGGAGCCTTTCAC
CTCTAGGTCAGTGGGTTCAAATCCAGCCCAGGTCAGTAGTGACCGAAAGT
CATTACCATCTGATGGCTGTTTCAAGTGGCCTATGTGAAATGAGTTGGTGGT
CTCAGTCCAGTTCCTAGTGGACAGGTGTCCACATCACAAAACCACCATCA
CAATTGGCACTAATTGGCACCCCTTGTGGCAGTCTCAGCAGAGAGGCCAA
GGATTGAATGGGCATGGAGACTGAACTACCCTCTCAACCCTGTAGAGGTG
GTCCCTCCAGGGCAGGGTTGAGGCACATTGGCAGGGCAATGTGGGGAAGC
CTGCACTGCTGCTGCCATGCTGTACCTGTTCTGTGGATAAATAGAGGAC
TTCAGTCTCTGGTGCTATCAATCTAGCACCTTTCACGAGCACTAAATTCA
CACAAAAAATTTAAAAAAAAAAAAAAAAAAAAA

```

Figure S2: **Reconstructed Coelacanth LF-SINE.** The LF-SINE was reconstructed from 59 available instances in the Indonesian coelacanth, based on similarity to ultraconserved element uc.338. The SINE is tRNA derived and believed to be recently active in coelacanth, and long-inactivated in tetrapods. See also Fig. 1 and Fig. S14.

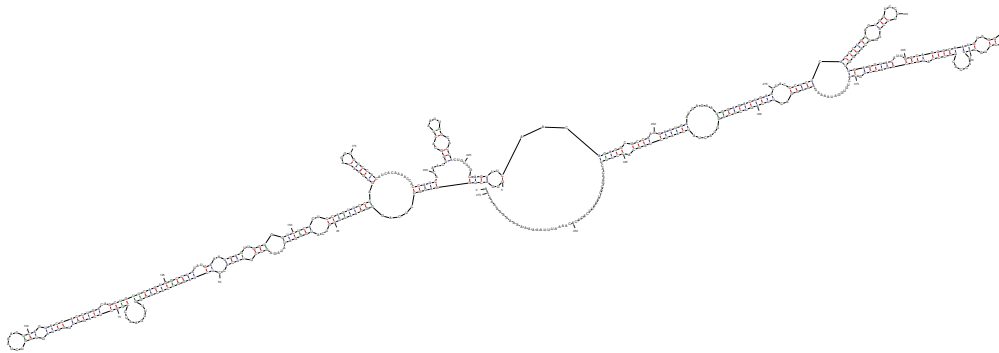

Figure S3: **RNA Secondary structure potential of the LF-SINE.** An energy based mfold (Zuker, 2003) prediction for the closest coelacanth instance to the reconstructed SINE. Secondary structure prediction for the PCBP2 exonized instance containing uc.338 is qualitatively similar (not shown).

| Species | Subst./Site to Human |
|---------|----------------------|
| chimp   | 0.01                 |
| macaque | 0.05                 |
| rat     | 0.41                 |
| mouse   | 0.42                 |
| dog     | 0.30                 |
| opossum | 0.59                 |
| chicken | 0.91                 |
| frog    | 1.37                 |

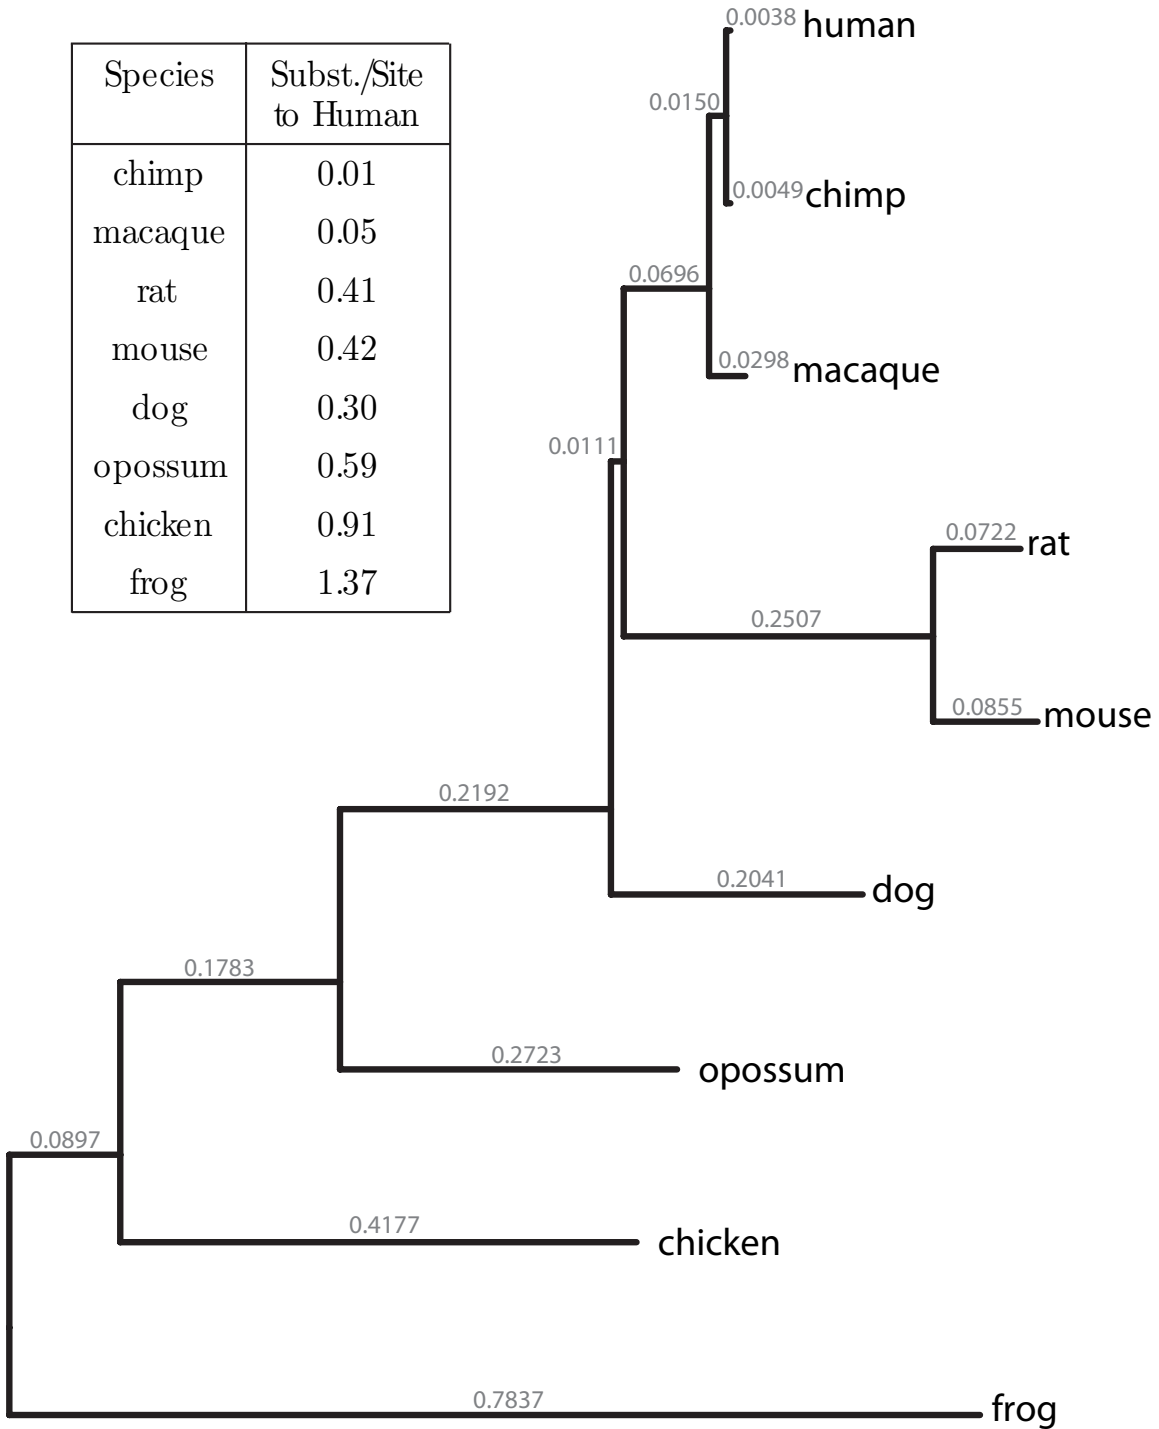

Figure S4: **A tetrapod phylogenetic tree.** This tree, adapted from (Margulies *et al.*, 2005), was used in estimating the conservation p-values for the human LF-SINE instances and their orthologs.

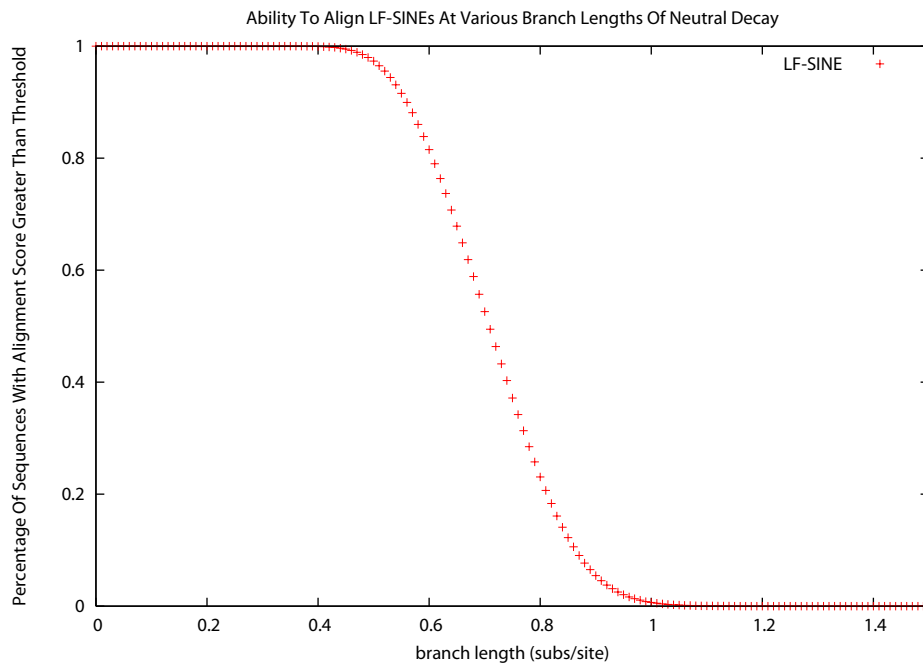

Figure S5: **Detecting homology using pairwise sequence similarity as a function of divergence.** The LF-SINE was placed under an estimated model of neutral decay, at branch lengths of 0-2 substitutions per site, in increments of 0.01. At each sample point we generated  $10^6$  sequences, and attempted to recover them using Blastz. We plot the fraction of recovered instances above our scoring threshold.



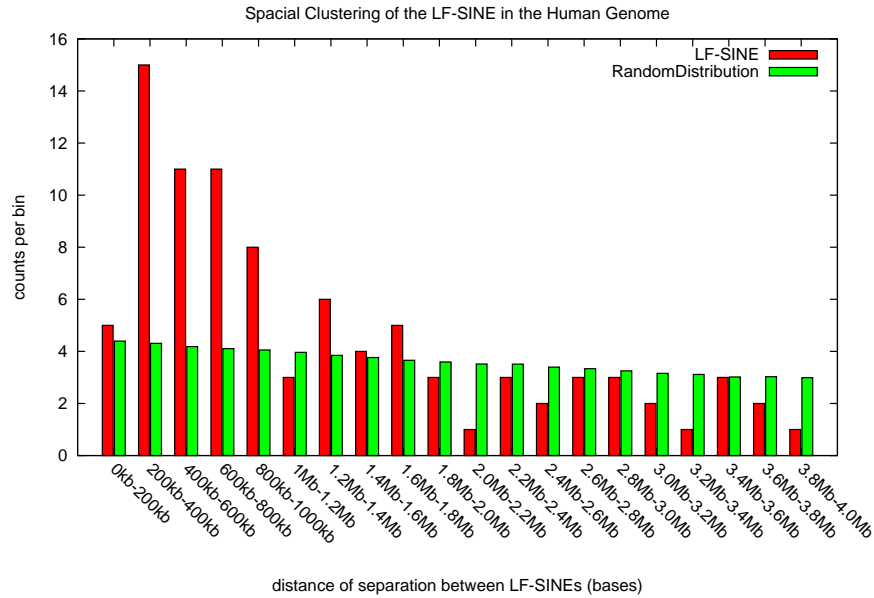

Figure S6: **LF-SINE instances tend to cluster in the human genome.** The histogram shows a distinct preference of the LF-SINE to be within 1MB of another copy. The random distribution has the same number of instances per chromosome, randomly placed avoiding actual assembly gaps in hg17. Based on  $10^5$  iterations.

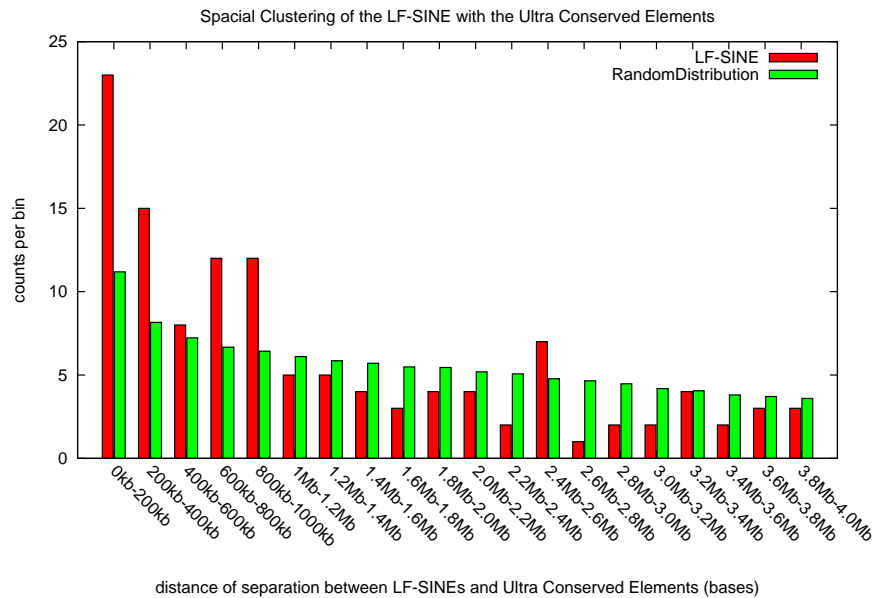

Figure S7: **Human LF-SINE instances are enriched in proximity to ultraconserved elements.** The histogram shows an enrichment for LF-SINE instances within 1MB of human ultraconserved elements. Random distribution as in Fig. S6. Based on  $10^5$  iterations.

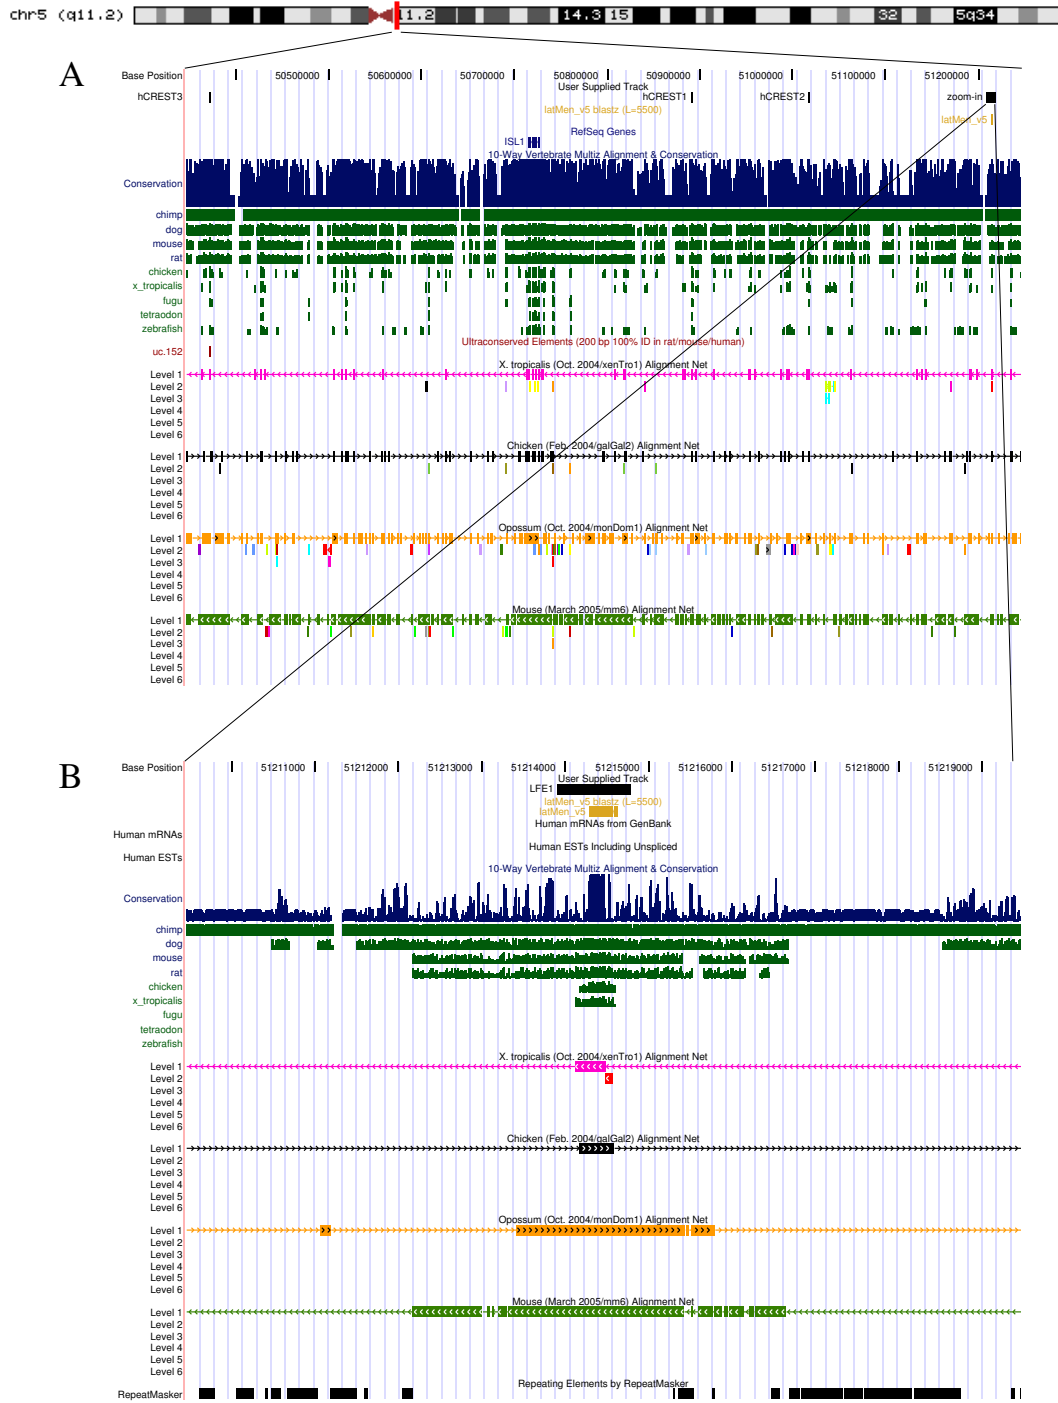

Figure S8: **Genomic context of the novel ISL1 enhancer.** ISL1 resides in a pericentromeric region of chr. 5q (top). (A) blow up of 900kb Containing ISL1, three known distal enhancers, hCREST1-3 (Uemura *et al.*, 2005), the latter overlapping ultraconserved element uc.152, and the LF-SINE instance (“LatMen\_v5”). Frog, chicken, opossum and mouse alignment nets (Kent *et al.*, 2003) show that these functional units have conserved their relative ordering since the amphibian-amniote split. (B) Further blow up of 10kb containing our validated enhancer (“LFE1” for living-fossil enhancer), showcasing its multi-species conservation and repeat free immediate vicinity.

|                |                                                                                                                                                                                                                                                                                                                                                                                                                                                                                                                                                                                            |     |
|----------------|--------------------------------------------------------------------------------------------------------------------------------------------------------------------------------------------------------------------------------------------------------------------------------------------------------------------------------------------------------------------------------------------------------------------------------------------------------------------------------------------------------------------------------------------------------------------------------------------|-----|
|                | 481                                                                                                                                                                                                                                                                                                                                                                                                                                                                                                                                                                                        | 450 |
| SINE-RevComp   | TTTTTTTTTTTTTTTTTAAATTTTTTTGTGTGAATTT-AGTGCTCGTGAAAGGTGCTAG-ATTGATAGCACCAG                                                                                                                                                                                                                                                                                                                                                                                                                                                                                                                 |     |
| hg-RORA_f2     | -----                                                                                                                                                                                                                                                                                                                                                                                                                                                                                                                                                                                      |     |
| mm-RORA_f2     | -----                                                                                                                                                                                                                                                                                                                                                                                                                                                                                                                                                                                      |     |
| hg-EEF1B2_f1   | -----                                                                                                                                                                                                                                                                                                                                                                                                                                                                                                                                                                                      |     |
| hg-PTDSR_f1    | -----                                                                                                                                                                                                                                                                                                                                                                                                                                                                                                                                                                                      |     |
| mm-PTDSR_f1    | -----                                                                                                                                                                                                                                                                                                                                                                                                                                                                                                                                                                                      |     |
| hg-KIAA1409_f2 | -----                                                                                                                                                                                                                                                                                                                                                                                                                                                                                                                                                                                      |     |
| mm-KIAA1409_f2 | -----                                                                                                                                                                                                                                                                                                                                                                                                                                                                                                                                                                                      |     |
| gg-KIAA1409_f2 | -----                                                                                                                                                                                                                                                                                                                                                                                                                                                                                                                                                                                      |     |
| hg-PCBP2_f0    | -----                                                                                                                                                                                                                                                                                                                                                                                                                                                                                                                                                                                      |     |
| mm-PCBP2_f0    | -----                                                                                                                                                                                                                                                                                                                                                                                                                                                                                                                                                                                      |     |
| hg-SMARCA4_f0  | -----                                                                                                                                                                                                                                                                                                                                                                                                                                                                                                                                                                                      |     |
| mm-SMARCA4_f0  | -----                                                                                                                                                                                                                                                                                                                                                                                                                                                                                                                                                                                      |     |
| hg-FLJ22833_f1 | -----                                                                                                                                                                                                                                                                                                                                                                                                                                                                                                                                                                                      |     |
| hg-ARHGAP6_f1  | -----                                                                                                                                                                                                                                                                                                                                                                                                                                                                                                                                                                                      |     |
| mm-ARHGAP6_f1  | -----                                                                                                                                                                                                                                                                                                                                                                                                                                                                                                                                                                                      |     |
| hg-LRP1B_f0    | -----                                                                                                                                                                                                                                                                                                                                                                                                                                                                                                                                                                                      |     |
| hg-DHX30_f2    | -----                                                                                                                                                                                                                                                                                                                                                                                                                                                                                                                                                                                      |     |
| gg-PPP2R2C_f2  | -----                                                                                                                                                                                                                                                                                                                                                                                                                                                                                                                                                                                      |     |
| xt-MBNL1_f0    | -----                                                                                                                                                                                                                                                                                                                                                                                                                                                                                                                                                                                      |     |
| hg-NT5C2_f1    | -----TTTCTAAAGtgaATTT-<br>  E F S A S E R C H I A N L<br>-----TTTCTAAAGtgaATTT-<br>  E F S A S E R C H I A S L<br>-----TTTCTAAAGtgaATTT-<br>  * I Y C S * K V P D * Q L W<br>-----TTATTTAAAGtgaATAt-<br>  E F * C S * K V S D * K P W<br>-----GTTTTTTAGtgaATTTtagTGCTcgTGAaagGTGtcaG-<br>  * F * C S * T V P D * Q N W<br>-----ATTCTCTAGtgaTTTt-<br>  * F S E R C E S E S L * K M L G L A A P<br>-----ATTTTATAGttaaTTtagtGAAagaTGTgaaAGTg-<br>  * F S E R C E S E S L * K M L G L A A P<br>-----ATTTTATAGttaaTTtagtGAAagaTGTgaaAGTg-<br>  * F S E R C E S E S L * K M L G L A A P<br>----- |     |
| mm-NT5C2_f1    | -----TTTCTAAAGtgaATTT-<br>  E F S A S E R C H I A S L<br>-----TTTCTAAAGtgaATTT-<br>  * I Y C S * K V P D * Q L W<br>-----TTATTTAAAGtgaATAt-<br>  E F * C S * K V S D * K P W<br>-----GTTTTTTAGtgaATTTtagTGCTcgTGAaagGTGtcaG-<br>  * F * C S * T V P D * Q N W<br>-----ATTCTCTAGtgaTTTt-<br>  * F S E R C E S E S L * K M L G L A A P<br>-----ATTTTATAGttaaTTtagtGAAagaTGTgaaAGTg-<br>  * F S E R C E S E S L * K M L G L A A P<br>-----                                                                                                                                                    |     |
| hg-ATF2_f0     | -----TTATTTAAAGtgaATAt-<br>  E F * C S * K V S D * K P W<br>-----GTTTTTTAGtgaATTTtagTGCTcgTGAaagGTGtcaG-<br>  * F * C S * T V P D * Q N W<br>-----ATTCTCTAGtgaTTTt-<br>  * F S E R C E S E S L * K M L G L A A P<br>-----ATTTTATAGttaaTTtagtGAAagaTGTgaaAGTg-<br>  * F S E R C E S E S L * K M L G L A A P<br>-----                                                                                                                                                                                                                                                                        |     |
| gg-DMTF1_f1    | -----GTTTTTTAGtgaATTTtagTGCTcgTGAaagGTGtcaG-<br>  * F * C S * T V P D * Q N W<br>-----ATTCTCTAGtgaTTTt-<br>  * F S E R C E S E S L * K M L G L A A P<br>-----ATTTTATAGttaaTTtagtGAAagaTGTgaaAGTg-<br>  * F S E R C E S E S L * K M L G L A A P<br>-----                                                                                                                                                                                                                                                                                                                                    |     |
| JGI-49280_f0   | -----ATTCTCTAGtgaTTTt-<br>  * F S E R C E S E S L * K M L G L A A P<br>-----ATTTTATAGttaaTTtagtGAAagaTGTgaaAGTg-<br>  * F S E R C E S E S L * K M L G L A A P<br>-----                                                                                                                                                                                                                                                                                                                                                                                                                     |     |
| hg-TCERG1_f1   | --ATTTTATAGttaaTTtagtGAAagaTGTgaaAGTg-<br>  * F S E R C E S E S L * K M L G L A A P<br>-----ATTTTATAGttaaTTtagtGAAagaTGTgaaAGTg-<br>  * F S E R C E S E S L * K M L G L A A P<br>-----                                                                                                                                                                                                                                                                                                                                                                                                     |     |
| mm-TCERG1_f1   | --ATTTTATAGttaaTTtagtGAAagaTGTgaaAGTg-<br>  * F S E R C E S E S L * K M L G L A A P<br>-----ATTTTATAGttaaTTtagtGAAagaTGTgaaAGTg-<br>  * F S E R C E S E S L * K M L G L A A P<br>-----                                                                                                                                                                                                                                                                                                                                                                                                     |     |

Figure S9: **Alignment of tetrapod exonized instances to the coelacanth SINE.** In all known cases where an LF-SINE instance has undergone exonization, the LF-SINE is found on the opposite strand relative to the gene. The reverse complement of the LF-SINE sequence from Fig. S2 is displayed in the top row. All known instances of exonization are presented at both the amino acid and nucleic acid level. Pipes are placed on the first bases outside of the exons and the case of coding bases is used to show the codon structure. The fN suffix to the gene name indicates the entry reading frame.

```

                400                                350
SINE-RevComp  AGACTGAAGTCTCTATTTATCCACAGAACAGGTAC---AGCATGGGCAGCAGCAGTGC---AG---GCT---
                |   Q   A   W   Y   R   A
hg-RORA_f2    -----ATAT---CCGCAGggcagGCAtggTAC---agaGCGct---
                |   Q   A   W   Y   R   E
mm-RORA_f2    -----ATAT---CCGCAGggcagGCAtggTAC---agaGAGct---
                |   *   N   M   D   S   S   N   S   T
hg-EEF1B2_f1  -----CACAGAACAGgtag---AACatgGACagcAGCaatTC---Aac--tTT---
                |   Y   S   T   G   S   G   S   A   S
hg-PTDSR_f1   -----CACAGAACAGatac---AGCacgGGCagcGGCagtGC---Aa---gcC---
                |   Y   S   T   G   S   G   S   A   S
mm-PTDSR_f1   -----CACAGAACAGatac---AGCacgGGCagcGGCagtGC---Aa---gcC---
                |   Q   I   Q   P   G   K   R   Q   C
hg-KIAA1409_f2 -----TTATCCACAGaacagATAc---agCCTgggAAAacgcCAGtgt---AA-----
                |   Q   I   Q   P   G   K   R   Q   C
mm-KIAA1409_f2 -----TTATCCACAGaacagATAc---agCCCgggAAGcggCAGtgt---AA-----
                |   Q   I   Q   H   G   K   R   L   C
gg-KIAA1409_f2 -----TTATCCACAGagcagATAc---agCATggaAAGcggCTAtgc---A-----
                |   D   R   Y   S   T   G   S   D   S   A   S
hg-PCBP2_f0   -----TTATCCACAGgacAGGtac---AGCacaGGCagcGACagtGC---Ga---gcT---
                |   D   R   Y   S   T   G   S   D   S   A   S
mm-PCBP2_f0   -----TTATCCACAGgacAGGtac---AGCacaGGCagcGACagtGC---Ga---gcT---
                |   S   R   H   C   S   T   G   S   G   S   A   S
hg-SMARCA4_f0 -----TTATCCACAGagcAGAcacTGCagcACGggcAGCggcAGTgc---cA---GCT---
                |   S   R   H   C   S   T   G   S   G   S   A   S
mm-SMARCA4_f0 -----TTATCCACAGagcAGAcacTGCagcACGggcAGCggcAGTgc---cA---GCT---
                |   L   G   A   V   Q   A   A   A   M   R   D
hg-FLJ22833_f1 -----TTATCCACAGtctaGGTgc---gGTGcagGCAgccGCAatgC---GA---gat---
                |   T   S   S   V   L   P   A   A   V   Q   A
hg-ARHGAP6_f1 -----TTGTCCCAGaacAGTtc---tGTGcttCCGgctGCAgtgC---AG---gcc---
                |   T   S   S   V   L   P   A   A   G   Q   A
mm-ARHGAP6_f1 -----TTATCCACAGaacAGTtc---tGTAttgCCGgccGCAgggC---AG---gct---
                |   A   R   Y   I   G   G   G   P   S   A   F   K
hg-LRP1B_f0   -----TTATATACAGgccAGGtac---ATAgggGGAgaCCcagtGCTttcAA---Gct---
                |   R   A   Q   H   R   Q   R   Q   C   K
hg-DHX30_f2   -----CTTCCCAGatcggGCCc---agCACaggCAGcgtCAGtgc---AA---Act---
                |   E   V   *   Q   G   Q   Q   Q   C   K
gg-PPP2R2C_f2 -----TTCTCCACAGgagagGTAt---agCAAgggCAGcagCAAtgc---AA---Gct---
                |   A   S   Y   N   Q   A   A   A   V   R   A
xt-MBNL1_f0   -----TTATCCACAGgccAGGtac---AAT-cagGCAgctGCAGtgC---GA---gct---
R D          G   T   A   P   A   A   P   C   R
hg-NT5C2_f1   Agat-----GGGac---aGCAccaGCAGctCCA-tgc---AG---Gct---
R D          G   Q   R   Q   Q   L   H   A   G   S
mm-NT5C2_f1   Agat-----GGAc---agCGCagCAGctcCA-Tgc---aG---GCtctCA
K L K D S N Y P Q T |
hg-ATF2_f0    aaaCTGaagGACTcttAATtatCCAcagACCagGTAC---AATATG-----
R L K S S L F H R T |
gg-DMTF1_f1   agaCTGaagTCTtct-TTAttcACagaACagGTAC---AGCACA-----
K L Q F S N Y P Q N |
JGI-49280_f0  aaaCTGcagTTCtccAATtatCCAcagAACagGTAA---AGCATG-----
Q T E V L C S S T E Q |
hg-TCERG1_f1  agACTgaaGTCctcTGTtcaTCCacaGAAcagGTAC---AGCACG-----
Q T E V L C S S T E Q |
mm-TCERG1_f1  agACTgaaGTCctcTGTtcaTCCacaGAAcagGTAC---AGCACG-----

```

Figure S9: Alignment of tetrapod exonized instances to the coelacanth SINE (contd.)

SINE-RevComp -T-C-CCCAC---ATTGCC--C-----T---GCCAATGTGCCTCAACCCTGCCCT-GGAGGGACCA-CC-TCT  
L P C T A L P M S S S L A R R D P L

hg-RORA\_f2 -t-C-CTtgc---ACAgcc--T-----T---GcccATGagc-cTCGtccCTGgccC-GGaggGACcc-aC-TcT  
L P C T A L P M S S S L A W R D P L

mm-RORA\_f2 -t-C-CTtgc---ACAgcc--T-----T---GcccATGagc-TCGtccCTGgccT-GGaggGACcc-aC-TcT  
F P H T A L P M C L D L D L G G P P

hg-EEF1B2\_f1 -T-c-ccCAC---actGCC--c-----t---gCCAatgTGCctcGACcttGACct-gGGggcCCA-cc-tCT  
H P Q P P R A T V S Q P \* P G G T S S

hg-PTDSR\_f1 -A-C-ccaCA---GccaCC--Ccg-----t---GCCactGTGtccCAAccTGAcct-GGaggGACCa-gc-TCT  
H P Q P P R A T V S Q P \* P G G T S S

mm-PTDSR\_f1 -A-C-cccCA---GccaCC--Ccg-----t---GCCactGTGtccCAAccTGAcct-GGaggGACCa-gc-TCT  
N V P T C L N P D L E G Q P

hg-KIAA1409\_f2 -----C-g-----t---gCCAacgTGCctaAACcctGACct-gGAGggGACAG-cc-aTT  
N V P M C L N P D L E G Q P

mm-KIAA1409\_f2 -----C-g-----t---gCCAatgTGCctaAACcctGACct-gGAGggGACAG-cc-aTT  
N V P V C L N P D L E G P P

gg-KIAA1409\_f2 -----ATgtcC--C-----T---g-----tTGCctaAACcctGACct-gGAGggGACCA-cc-aCT  
F P H T T P S M C L N P D L E G P P

hg-PCBP2\_f0 -TTc-ccCAC---accACC--c-----c---gTCCatgTGCctcAACcctGACct-gGAGggGACCA-cc-tCT  
F P H T T P S M C L N P D L E G P P

mm-PCBP2\_f0 -TTc-ccCAC---accACC--c-----c---gTCCatgTGCctcAACcctGACct-gGAGggGACCA-cc-tCT  
F A H T A P P P A G V N P D L E E P P

hg-SMARCA4\_f0 -t-cGCCcac---ACTgcc--C-----CTccgCCAgcgGGCgtcAACcccGACtt-gGAGgagCCA-cc-tCT  
F A H T A P P P A G V N P D L E E P P

mm-SMARCA4\_f0 -t-cGCCcac---ACTgcc--C-----CTccgCCAgcgGGCgtcAACcccGACtt-gGAGgagCCA-cc-tCT  
S I H Y Y P G N D L H P D L E E P S S

hg-FLJ22833\_f1 -T-C-CataCActacTACc--c-----t---GGTaatG-ATctcCACcctGACct-gGAGggGACCA-cc-tCT  
C P Q Y P A S M F T P \* P G G T S

hg-ARHGAP6\_f1 -T-G-CccaC---AGtacC--C-----T---gccAGCagTgTTacgCCctgaCCT-ggaGGGaccA-GC-t--  
C S Q S P A S D F T P \* P G E T S

mm-ARHGAP6\_f1 -T-G-CtcaC---AGagcC--C-----T---gccAGCgacTTTacaCCctgaCCT-ggaGAGaccA-GC-t--  
L P H T A P P I Y L N S D L K G P L T

hg-LRP1B\_f0 -t-C-CAcac---ACAgcg--C-----C---GcccATCtacCTAaacTCTgatTT-GaaaGGAcca-CTAact  
L P P P R L P P M C V N P T P G G T I S

hg-DHX30\_f2 -tCC-CccaC---CCcgCCTTc-----c---aCCcatgTGTgtcAACcctACCccaGGaggGACCa-tc-TCT  
L P H I V L P M F L N P V R K R S L

gg-PPP2R2C\_f2 -t-C-CCcac---ATTgtc--C-----T---GccaATGttcCTCaacCCAgttCG-GaagAGGtca-CT-Tct  
S P R C P T N D L S P D V E G A P S

xt-MBNL1\_f0 -T-C-CccgC---GTtgcC--C-----A---accAATg-acCTCagcCCCgatGT-GgagGGAgcaCCC-tct  
L S P P T R P L S L P V C C S H H F

hg-NT5C2\_f1 -c-T-CACct---CCCaca--C-----G---GcccCTCt-ccTTGccaGTgtgT-GCagcCACca-cT-TcT  
H L P H G P S P C Q C A A A M F G R D H L

mm-NT5C2\_f1 Cc-t-cCCAc---acGGCc--ccTCTcctT---GCcagTGTgtGCAgccATGtttG-GAaggGACCa-cT-TGt

hg-ATF2\_f0 -----

gg-DMTF1\_f1 -----

JGI-49280\_f0 -----

hg-TCERG1\_f1 -----

mm-TCERG1\_f1 -----

Figure S9: Alignment of tetrapod exonized instances to the coelacanth SINE (contd.)

```

SINE-RevComp   ACA--GGGTTGAGAGGGTAGTTCACTCCATGCCCATCAATCCTTGGCCTCTCTGCTGAGACTGCCAACAAGGGT
                * R |
hg-RORA_f2     agAGGtgGT--AAGTAATT-----
                * R |
mm-RORA_f2     agAGGtgGT--AAGTAATC-----
                L G * E G G S           F I Q S L A I L L K L P T R
hg-EEF1B2_f1   ----GgggTGAgagGGTggcTCatt-----cATTcagTCcttgGCCattCTTctgAAActgCCAacaAGGg-
                R |
hg-PTDSR_f1    -cg--gGGTAAGAGAGG-----
                R |
mm-PTDSR_f1    -cg--gGGTAAGAGAGG-----
                L R M R |
hg-KIAA1409_f2 --G--aggATGagaGGTTAGTTGAG-----
                L R T R |
mm-KIAA1409_f2 --G--aggACAagaGGTTGGTTGAG-----
                L R I R |
gg-KIAA1409_f2 --A--agaATCagaGGTTAGTTCAG-----
                L E |
hg-PCBP2_f0    Aga--gGT-GAGAGGGG-----
                L E |
mm-PCBP2_f0    Aga--gGT-GAGAGGGG-----
                L K |
hg-SMARCA4_f0  Aaa--gGT-GAGAGGGG-----
                L K |
mm-SMARCA4_f0  Aaa--gGT-GAGAGGGG-----
                L G V * |
hg-FLJ22833_f1 cta--GGGgtg-TAAgGTAATTCAGC-----
                * |
hg-ARHGAP6_f1  -aa--GGGT-GAGAATGT-----
                * |
mm-ARHGAP6_f1  -aa--GGGT-GAGAATGT-----
                A G |
hg-LRP1B_f0    GCT-gggGT-GAGAGAAG-----
                R |
hg-DHX30_f2    cga---GGTAAGGGAGG-----
                L E |
gg-PPP2R2C_f2  gGA---GGTGAGTGGGT-----
                L W |
xt-MBNL1_f0    TTA-tggGT-GAGAGGTA-----
                * L A           S P G N           E D G Q Q R
hg-NT5C2_f1    -----gaTTGgctTC-----TcctGGGaat-----GAAgacGGCagCAGaggT
                * L G L K T A S R G A N C D N * V G |
mm-NT5C2_f1    gaC--TGggaTTGaagACGgccAGCagaGGTgctAATtgtGACaacTGAgTgGGAgGTTTGTGTGA-----
hg-ATF2_f0     -----
gg-DMTF1_f1    -----
JGI-49280_f0   -----
hg-TCERG1_f1   -----
mm-TCERG1_f1   -----

```

Figure S9: Alignment of tetrapod exonized instances to the coelacanth SINE (contd.)

|                |                                                                              |     |
|----------------|------------------------------------------------------------------------------|-----|
|                | 200                                                                          | 150 |
| SINE-RevComp   | GCCAATTAGTGCCAATTGTGATGGTGGTTTTGTGATGTGGACACCTGTCCACTAGGAACTGGACTGAGA-CCACC  |     |
| hg-RORA_f2     | -----                                                                        |     |
| mm-RORA_f2     | -----                                                                        |     |
| hg-EEF1B2_f1   | V E V W G S G L Q F T K N G T E H T                                          |     |
|                | -----tgGAAgttTGGggaAGTggaCTCagTTCactAAGaatGGAactGAGc-atACT                   |     |
| hg-PTDSR_f1    | -----                                                                        |     |
| mm-PTDSR_f1    | -----                                                                        |     |
| hg-KIAA1409_f2 | -----                                                                        |     |
| mm-KIAA1409_f2 | -----                                                                        |     |
| gg-KIAA1409_f2 | -----                                                                        |     |
| hg-PCBP2_f0    | -----                                                                        |     |
| mm-PCBP2_f0    | -----                                                                        |     |
| hg-SMARCA4_f0  | -----                                                                        |     |
| mm-SMARCA4_f0  | -----                                                                        |     |
| hg-FLJ22833_f1 | -----                                                                        |     |
| hg-ARHGAP6_f1  | -----                                                                        |     |
| mm-ARHGAP6_f1  | -----                                                                        |     |
| hg-LRP1B_f0    | -----                                                                        |     |
| hg-DHX30_f2    | -----                                                                        |     |
| gg-PPP2R2C_f2  | -----                                                                        |     |
| xt-MBNL1_f0    | -----                                                                        |     |
|                | C * L * Q L S G R F V * * L S V Q A E L H * N P                              |     |
| hg-NT5C2_f1    | GCtaaTT-GtgaCAActgAG-TgggAGGtttGTGtgaTGAttaTCTgtcCAAagcaGAAttaCACTaaAACcccCC |     |
| mm-NT5C2_f1    | -----                                                                        |     |
| hg-ATF2_f0     | -----                                                                        |     |
| gg-DMTF1_f1    | -----                                                                        |     |
| JGI-49280_f0   | -----                                                                        |     |
| hg-TCERG1_f1   | -----                                                                        |     |
| mm-TCERG1_f1   | -----                                                                        |     |

Figure S9: Alignment of tetrapod exonized instances to the coelacanth SINE (contd.)

100

```

SINE-RevComp      AACTCATTTACATAGGCCACTGAACAGCCATC---AGATGGTAATGACTTTCGGTCACTACTGACCTGGGCTGG
hg-RORA_f2        -----
mm-RORA_f2        -----
                  * * N L K Q K C S Y * K S K S |
hg-EEF1B2_f1      taaTGAaatCTCaaaCAGaaatGTtcaTACTgaAAGagtAAAAtcaTAGTGAGTATTG-----
hg-PTDSR_f1       -----
mm-PTDSR_f1       -----
hg-KIAA1409_f2    -----
mm-KIAA1409_f2    -----
gg-KIAA1409_f2    -----
hg-PCBP2_f0       -----
mm-PCBP2_f0       -----
hg-SMARCA4_f0     -----
mm-SMARCA4_f0     -----
hg-FLJ22833_f1    -----
hg-ARHGAP6_f1     -----
mm-ARHGAP6_f1     -----
hg-LRP1B_f0       -----
hg-DHX30_f2       -----
gg-PPP2R2C_f2     -----
xt-MBNL1_f0       -----
                  P T H F T A A T Q E P F R D |
hg-NT5C2_f1      AactCATttcACAgcaGCTaccCAGgagCCAttcAGGgatGGTAATTAAAT-----
mm-NT5C2_f1      -----
hg-ATF2_f0        -----
gg-DMTF1_f1       -----
JGI-49280_f0      -----
hg-TCERG1_f1      -----
mm-TCERG1_f1      -----

```

Figure S9: Alignment of tetrapod exonized instances to the coelacanth SINE (contd.)



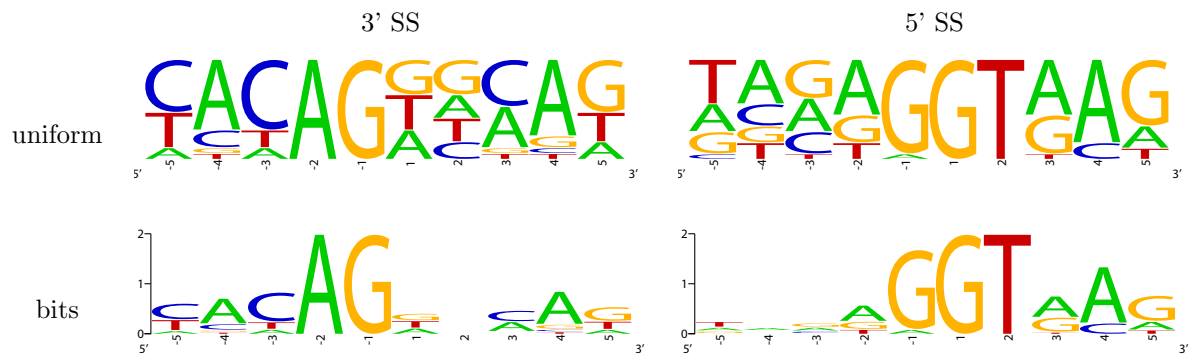

Figure S10: **Sequence logos for human exonized instances.** The observed splice sites donated by the LF-SINE do not show a distinct pattern beyond the AG and GGT that is common for exons in the human genome. Figures generated using WebLogo (Crooks *et al.*, 2004).

```

LF-SINE AACAGGTACAGCATGGGCAGCAGCAGTGCAGGCTTCCCCACATTGCCCTGCCAATGTGCCTCAACCCTGCCCTGGAGGGACCACCTCTACAGG
Frame0  N R Y S M G S S S A G F P T L P C Q C A S T L P W R D H L Y R
Frame1  T G T A W A A A V Q A S P H C P A N V P Q P C P G G T T S T
Frame2  Q V Q H G Q Q Q C R L P H I A L P M C L N P A L E G P P L Q

```

Blastx of this region adds

>gi|50746727|ref|XP\_420628.1| Gene info PREDICTED: similar to PR domain containing 5 [Gallus gallus]  
Length=722

Score = 41.2 bits (95), Expect = 0.010  
Identities = 16/30 (53%), Positives = 20/30 (66%), Gaps = 0/30 (0%)  
Frame = +3

```

Query 3  QVQHGGQQCRLPHIALPMCLNPALEGPPLQ 92
        +VQH Q C LPH +CLNP LE PP++
Sbjct 459 KVQHRHQHCELPHSVSSICLNPVLEEPPVE 488

```

>gi|1172071|sp|P43115|PE2R3\_HUMAN Gene info Prostaglandin E2 receptor, EP3 subtype  
(Prostanoid EP3 receptor) (PGE receptor, EP3 subtype) (PGE2-R) Length=390

Score = 37.7 bits (86), Expect = 0.11  
Identities = 15/30 (50%), Positives = 20/30 (66%), Gaps = 0/30 (0%)  
Frame = +1

```

Query 4  RYSMGSSSAGFPTLPCQCASTLPWRDHLR 93
        RY + ++ +LPCQC+STL W DHL R
Sbjct 361 RYHTNNYASSSTSLPCQCSSTLMWSDHLER 390

```

Blastx to entire LF-SINE adds

>gi|50731480|ref|XP\_417282.1| Gene info PREDICTED: similar to EMSY protein [Gallus gallus] Length=1219

Score = 48.5 bits (114), Expect = 7e-05  
Identities = 31/70 (44%), Positives = 40/70 (57%), Gaps = 3/70 (4%)  
Frame = -1

```

Query 412 PETEVLYLSTEQVQH--GQQQCRLPHIALPMCLNPALEGPPLQG*EGSSVSMPIQLASL 239
        P T+ +T++ ++ G P A PMCLNP L+G PL G G SVSM IQ LASL
Sbjct 270 PSTQTNTTTQKNRYSTGSGSASFPQTAPMCLNPD LKG-PLLGMRGDSVSM LIQFLASL 328

```

```

Query 238 LRLPTRVPIS 209
        + + T P S
Sbjct 329 VIIITSPSS 338

```

Figure S11: **Additional Blastx exon hits to the LF-SINE.** The stop-codon free region between splice sites 381/289 is shown (top), along with two novel distant exon hits obtained by Blastx of this region (middle), and an additional, strong hit found by Blastx of the entire LF-SINE to a predicted exon which is out of the golden path in the current chicken genome draft and was thus excluded from our analysis (bottom).

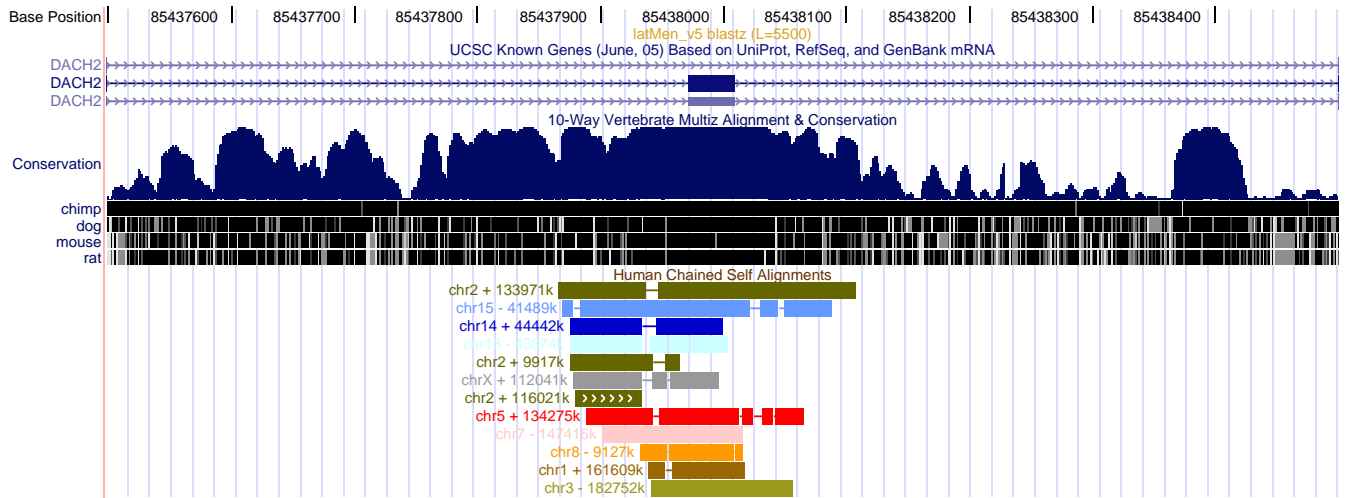

Figure S12: **An exonic candidate for an exaptation event, not related to the LF-SINE.** The second exon of DACH2 displays the characteristics of an exaptation event: it is an alternatively-spliced exon, not found in DACH1. The exon size is divisible by three, and forms part of the ORF in one isoform, is part of the 5' UTR in another, and is skipped in a third known gene isoform. It is found only in mammals, has a weak pairwise similarity to a mammalian-specific interspersed repeat (MIR) element, as well as to additional intronic and intergenic short paralogs in the human genome. A preliminary screen suggests the existence of dozens of exons with similar properties.

|               |                                                       |     |     |     |     |
|---------------|-------------------------------------------------------|-----|-----|-----|-----|
|               | 100                                                   | 110 | 120 | 130 | 140 |
| LF-SINE       | GAAAGTCA-TTACCATCTGATGGCTGTTTCAGTGGCCTA---TGTGAAATGAG |     |     |     |     |
|               | :                                                     | :   | :   | :   | :   |
| Core Domain   | GCAAGTCACTTAACCTCTCTGAGCC--TCAGTTTCCTCATCTGTAAATGGG   |     |     |     |     |
|               | 100                                                   | 110 | 120 | 130 | 140 |
|               |                                                       |     |     |     |     |
|               | 90                                                    | 100 | 110 | 120 |     |
| V-SINE(shark) | CTGTGTGGAGTTTGACATTCTC----CCCGTGTCTGCGTGGGTTTCCTC     |     |     |     |     |
|               | :                                                     | :   | :   | :   | :   |
| Core Domain   | CTGTGTGACCTTGGGCAAGTCACTTAACCTCTCTGAGCCTCAGTTTCCTC    |     |     |     |     |
|               | 90                                                    | 100 | 110 | 120 | 130 |

Figure S13: **The CORE domain signature of SINEs.** Both our LF-SINE and the V-SINE (Ogiwara *et al.*, 2002) show similarity to a section of the proposed “core domain” of the CORE-SINE superfamily (Gilbert and Labuda, 1999), although the LF-SINE and the V-SINE themselves do not align well. These similarities, 68% and 64% identity over 50 bases for LF-SINE and V-SINE, respectively, computed as in (Gilbert and Labuda, 1999), are in par with similarities observed in other vertebrate SINE families, classified into the CORE-SINE superfamily on this basis. We find this level of similarity by itself insufficient to determine common descent.



LF-SINE  
LF-SINE2  
Coelacanth0  
Coelacanth1  
Coelacanth2  
Coelacanth3  
Coelacanth4  
Coelacanth5  
Coelacanth6  
Coelacanth7  
Coelacanth8  
Coelacanth9  
Coelacanth10  
Coelacanth11  
Coelacanth12  
Coelacanth13  
Coelacanth14  
Coelacanth15  
Coelacanth16  
Coelacanth17  
Coelacanth18  
Coelacanth19  
Coelacanth20  
Coelacanth21  
Coelacanth22  
Coelacanth23  
Coelacanth24  
Coelacanth25  
Coelacanth26  
Coelacanth27  
Coelacanth28  
Coelacanth29  
Coelacanth30  
Coelacanth31  
Coelacanth32  
Coelacanth33  
Coelacanth34  
Coelacanth35  
Coelacanth36  
Coelacanth37  
Coelacanth38  
Coelacanth39  
Coelacanth40  
Coelacanth41  
Coelacanth42  
Coelacanth43  
Coelacanth44  
Coelacanth45  
Coelacanth46  
Coelacanth47  
Coelacanth48  
Coelacanth49  
Coelacanth50  
Coelacanth51  
Coelacanth52  
Coelacanth53  
Coelacanth54  
Coelacanth55  
Coelacanth56  
Coelacanth57  
Coelacanth58  
OutGroup  
PCBP2-Human  
PCBP2-Chimp  
PCBP2-Dog  
PCBP2-Mouse  
PCBP2-Rat  
PCBP2-Opossum  
ISL1-Human  
ISL1-Chimp  
ISL1-Dog  
ISL1-Mouse  
ISL1-Rat  
ISL1-Opossum  
ISL1-Chicken  
ISL1-Frog  
DACH1-Human  
DACH1-Chimp  
DACH1-Dog  
DACH1-Mouse  
DACH1-Rat  
DACH1-Opossum

```

CA GCCC AGGT CAG T AGTGACCGAAAAG TCATTACCATCTG ATGGCT GTT CAGTGG
CG GCTC AGGT CCG T AGTGACCGAAAAG TCAGTACCACCTG ACAGCT GTT CAGTGG
CG GCTC AGGT TGG T AGTGACCGAAAAG TTAGTACCAGCTG ACAGCT GTT CAGTGG
TC GCTC AGGT CAG T AGTGACCGAAAAG TTAGTACCATCTG ATAGCT GTT CAGTGG
CA GCTC AGGT CCG T AGTGACCGAAAAG TTGGTACCATCTG ACAGCT ATT CAGTGG
CG GCTC AGGT CCG C AGTGACCGAAAAG TCAGTACCATCTG AAAGCC GTT CAGTGG
AG GCTC AGGT TCA T AGTGATCAAAAAG TTGGTACCATCTA CTTGGT GTT CAGTGG
CA GCCC GGGT CAG T AATGAC AAAAG TTAGTACCACCTG TTTGGT GTT CAGTGG
TG GCTC AGGT CAG T AGTGATCGAAAAG TCAGTACCATCTG AAGGCC GTT CAGTGG
CG GCTC AGGT CCG T AACCAAGAAAAG TGGTACCATCTG ACTGCC ATT CAGTGG
CA GCTC AGGT CAG T TCTGATTGAAAAG TTGTATACATAAG ATAGCT ATT CAGTGG
AA GCCC AGGT CAG T A AGTGACCAAAAAG TCGGTACCATCTG AGAGCT GTT CAGTGG
CA GCTC AGGT CAG C AGTGACCAAAAAG TCAGTACCATCTG ACAAC ATT TAGTGG
CA GCCC AGGT CCG T AGTGATCGAGAG TCATTGCCATCTG ATGGCT GTT TAGTGA
CG GCTC AGGT TGG T AGTGACCAAAAAG CTGTACACCTG ATGGCT GTT CAGTGG
CA GATA AGGT TGG T AATGACCAAAAAG TCATTACCATCTG ATGGT GCT CAGTGG
CG GCTC AGGT TGA C AGTGACCAAAAAG TTGTTCCATCTG ATGGCT GTT TAGTGG
CG GCTC AGGT CCG T AGTGACCAAAAAG TTGGTACCATCTG ACAGCT ATT CAGTGG
CA GCTC AGGT TGG T TGTGTTGAAAAG TTATCACC TT GCAAGCT ATT CTGTGG
TA GCTC AGGT CAG T AGTCCCGAAAAG TCATTACCATCTG ACAGCT GTT CTGTGG
CA GCCC AGGT CAG T AGTGACGAAAAG TTGTTACCACCTG GCAAGT ATT TGGTGG
GTAAGCT GTTAAAAC CAGATA
CA ATT C AGGT CAG T AGTGATCAAAAAG TCAGTTCCGTC CA ACAGCT GTT CATTGG
G GCAC AGCTGCTA CCG T AGCGATAAAAAG CCATTACTACTG ACCACT GTT TAGTGG
TA GCTC AGGC TGT T AATGACCAAAAAG TTGGTACTTTCTG ATAGCT TAA AATGGG
CATGTC AGGT TGG T AGTGACCAAAAAG TTGTGC ATCTG ATTCCA GTT TGGTGA
TG GCTC ATGT CAC T AGGAATTGAAA TTATGACC TTT GTT TGGTGG
GCTC AGGT TGG T AGTGACCGAAAAG TTATGACC TTT GTT CAGTGG
TG ATGT AGGT TCGG T AGTGACCGAAAAG TTACACATCTG ATGAT GTT CAGTGA
TA CCCC ATGT TGT T TGTGACGAAAAG TTATCATCACCTG ATGGCT TTT CAGTCA
GG GCTC AGGT CAG T AGCAACTGAGAG TTGTTGCCATCTG CTTGGT GTT TCCGCA
CA TCCC AGGT CAG T AGTGATTGAAA TCATTACCATGCG ATGCTC GCT TAGGAG
TG GCTC AGGT CAG T ACTGATCAAAA TCATTATATG ATGGCC GTT TGGTGG
AA CCCC A CTT T AGGGACTACAAA TGATCACCACCTG ATGTGA TTT CATT
TG GCTC AGTT TGG T AGTGCCGAAAAG TTGTTACCATCAG AAAGCT AGC TGGTGG
Coelacanth38 TCATTCCACTAA GCAACT TTT CAGTGG
Coelacanth39 CA GTCC ATGT CCA T AGGACTCAAAA TCATTATCATACG ATGGT GTT GGTGT
Coelacanth40 TA GCTC AGGT TCG T AGTGACCAAAA TTGGTACCATCTG ACAGCT GTT CAGTGG
Coelacanth41 CA GCCC AGGT TGG T AGTGCCCAAAA TCATTACCACCTG ATGGCT GTT TGGTGG
Coelacanth42 TC T AGTGTGTA AAAAG TCATTACCATCTA ATAAGG GTT TAGTGA
Coelacanth43 CA GCTC TGGT CTTG AATCACCACCAA CAGCACCATCTGTAGA ATGGTT GTA TTTCAG
Coelacanth44 TCATT CAGATG AGGCAT CTG CAATCA AT
Coelacanth45 TA GCCC CAGC TA C AGTGACCAAAA AAAA TCATT CAGGTGGG AAACCT GCA TTGAGG T
Coelacanth46 TA GCCC CAGC TTG T AGTAACCAAAA AAAAA TCATT CAGGTGGG AAACCT GCA TTGAGG
Coelacanth47 CC ACCT CAG T GGTGACCAAAA TCAT CATTTG ACAGAT GCC TCCC
Coelacanth48 CA TCCC CAGC CTT T AGTACTGAAA TCAGCCAGTGA GAAACT ATC AAGG
Coelacanth49 TG ACCC TGGT CAG T AGTGACGAAAAG GCATTGAATCTG ACATCT GTT CAGTGA
Coelacanth50 CG GCTC AGGT CCG T AGTGACCGAAAAG TCATTACCATCTG ATGGCT GTT CAGTGG
OutGroup TTACCATCTG GTGG GCT ACGGGG
PCBP2-Human TTACCATCTG GTGG GCT ACGGGG
PCBP2-Chimp TTACCATCTG GTGG GCT ACGGGG
PCBP2-Dog TTACCATCTG GTGG GCT ACGGGG
PCBP2-Mouse TTACCATCTG GTGG GCT ACGGGG
PCBP2-Rat TTACCATCTG GTGG GCT ACGGGG
PCBP2-Opossum TTACCATCTG ATGG GCT ACGGGG
ISL1-Human
ISL1-Chimp
ISL1-Dog
ISL1-Mouse
ISL1-Rat
ISL1-Opossum
ISL1-Chicken
ISL1-Frog CTAAG TTCTGGTGTTCAT TTTGGG GTT CTTGGAAA
DACH1-Human TC GCCC ATAT TGG T AATGAC TGACAG TCATTAATATATG ATGGCT GTT TGATGG
DACH1-Chimp TC GCCC ATAT TGG T GATGAC TGACAG TCATTAATATATG ATGGCT GTT TGATGG
DACH1-Dog TG GCCC GTAT TGG T AATGAC TGACAG TCATTAATATATG ATGGCT GTT TGATGG
DACH1-Mouse TC GCCA ATAT TGG T AATGAC TGACAG TCATTAATATATG ATGGCT GTT TGATGG
DACH1-Rat TC GCCA ATAT CCG T AATGAC TGACAG TCATTAATATATG ATGGCT GTT TGATGG
DACH1-Opossum TA GCCC ATAT CCG T AATGAC TGACAG TCATTAATATATG ATGGCT GTT TGATGG

```

Figure S14: LF-SINE reconstruction (contd).





```

LF-SINE
LF-SINE2
Coelacanth0
Coelacanth1
Coelacanth2
Coelacanth3
Coelacanth4
Coelacanth5
Coelacanth6
Coelacanth7
Coelacanth8
Coelacanth9
Coelacanth10
Coelacanth11
Coelacanth12
Coelacanth13
Coelacanth14
Coelacanth15
Coelacanth16
Coelacanth17
Coelacanth18
Coelacanth19
Coelacanth20
Coelacanth21
Coelacanth22
Coelacanth23
Coelacanth24
Coelacanth25
Coelacanth26
Coelacanth27
Coelacanth28
Coelacanth29
Coelacanth30
Coelacanth31
Coelacanth32
Coelacanth33
Coelacanth34
Coelacanth35
Coelacanth36
Coelacanth37
Coelacanth38
Coelacanth39
Coelacanth40
Coelacanth41
Coelacanth42
Coelacanth43
Coelacanth44
Coelacanth45
Coelacanth46
Coelacanth47
Coelacanth48
Coelacanth49
Coelacanth50
Coelacanth51
Coelacanth52
Coelacanth53
Coelacanth54
Coelacanth55
Coelacanth56
Coelacanth57
Coelacanth58
OutGroup
PCBP2-Human
PCBP2-Chimp
PCBP2-Dog
PCBP2-Mouse
PCBP2-Rat
PCBP2-Opossum
ISL1-Human
ISL1-Chimp
ISL1-Dog
ISL1-Mouse
ISL1-Rat
ISL1-Opossum
ISL1-Chicken
ISL1-Frog
DACH1-Human
DACH1-Chimp
DACH1-Dog
DACH1-Mouse
DACH1-Rat
DACH1-Opossum

```

|       |            |    |        |         |         |                       |           |           |
|-------|------------|----|--------|---------|---------|-----------------------|-----------|-----------|
| A     | CTAATTGGC  | AC | CC     | TTGTTG  | GCAGTCT | CAGC                  | AGAG      | AG        |
| A     | CTAATTGGC  | AC | CA     | CTGTTG  | GCAGTCT | CAGC                  | AGAG      | AG        |
| A     | CTAATTGGC  | AC | CA     | CTGTTT  | GCAGTCT | CAGC                  | AGAG      | AG        |
| A     | TTAATTGGC  | AC | TA     | CTGTTG  | GCAGTCT | CAAA                  | TGAG      | AG        |
| G     | CTAATTGGC  | AC | CA     | CTGTTG  | GCAGTCT | CAAA                  | TGAG      | AG        |
| A     | TTAATTGGC  | AC | CA     | CTGTTA  | ACAGTCT | CAAA                  | TGAG      | AG        |
| .     | AATTGGC    | AC | CC     | AAATTG  | GCAGTCT | CAAA                  | GAAG      | AG        |
| .     | CTAATTGGC  | AC | CC     | TAGTTA  | TCAGTCT | CAAA                  | TGAG      | AG        |
| A     | CTAATTGGC  | AC | CC     | TAGTCT  | GCAGTCT | CAGC                  | AGAG      | AG        |
| .     | TTG        |    |        |         | GCAGTCT | CAAA                  | TAAG      | AG        |
| A     | TTAATTACT  | AC | CA     | CTATTG  | GCAGTCT | CAAA                  | TGAG      | AG        |
| A     | CTAATTGGC  | AC | CA     | TTGTTG  | TCAGTCT | CAGC                  | AGAG      | AG        |
| A     | CTAATTGGC  | AC | CA     | CTGTTG  | GCAGTCT | CAAA                  | TGAG      | AG        |
| A     | TTAATTACT  | AC | CA     | CTGTTG  | GCAGTCT | CAAA                  | TGAG      | AG        |
| A     | CTAATTGGC  | AC | CC     | TAGTTG  | GCAGTCT | CAGC                  | AGAG      | AG        |
| A     | ATAATTACT  | AC | CC     | TTGTTG  | GCAGTCT | CAGC                  | AGAG      | AG        |
| A     | ATAATTGGC  | AC | CC     | TTGTTG  | GCAGTCT | CAGC                  | AGAG      | AG        |
| A     | C          |    | CC     | TTGTTG  | GCAGTCT | ACAG                  | AGAG      | AG        |
| A     | CTAATTGGC  | AC | CC     | TAGTTA  | TCAGTCT | CAAA                  | TSAC      | AG        |
| A     | TTAATTGGT  | AC | TC     | TTGTTG  | GCAGCCT | CCAC                  | AGAG      | AG        |
| A     | CCAATTGGC  | AC | TG     | TTGTTG  | GCAGTCT | CAGC                  | AGAG      | AG        |
| .     | AGCTGGC    | AC | CC     | AACTGT  | GCAGCCT | CAGT                  | AGGG      | AT        |
| A     | TTAGTTGGC  | AC | CC     | TAGTTG  | GCAGTCT | CAAA                  | TGAG      | AG        |
| A     | CCA        |    |        | CTGTTG  | GCAGTCT | CAAA                  | CGAG      | AG        |
| .     | TTGGC      | AC | CA     | TTATCA  | GCAGCCT | CAAC                  | AGAA      | GG        |
| A     | CTCATTGGC  | AC | CT     | TTGTTG  | GCAGTCT | CAAA                  | TGAG      | AG        |
| .     |            |    |        | TTGTCG  | GCAGTCT | TAGC                  | AGAG      | AG        |
| .     | CTAATTGGC  | AC | CT     | TTGTTG  | GCAGTCT | CATC                  | AGAG      | AT        |
| A     | TGRATTGAC  | AC | AC     | TTGTTG  | CTATTC  | CAGC                  | AGAG      | AG        |
| A     | CTAATTGGC  | AC | CA     | CTGTTG  | GCAGTCT | TAAA                  | TGAG      | AG        |
| .     | GRACTCAT   | AC | CT     | TTGTTG  | GCAGTCT | CAGC                  | AGAG      | GA        |
| .     | TTAATTACT  | AC | CC     | TTGTTG  | GCAGTCT | CAAA                  | AGAG      | AA        |
| A     | CTAATTGGC  | AC | CA     | TTATCA  | GCAGTCT | TCAC                  | AGAG      | AG        |
| A     | TAATTGTC   | AC | CC     | TTGTTG  | GCAGTCT | CAAC                  | AGAG      | AG        |
| A     | TCA        |    |        | TTGTTG  | GCAGTCT | AGCC                  | AGAG      | AG        |
| A     | CTAGTTGAC  | AC | CC     | TTGTTG  | GCAGTCT | TAGC                  | AGAG      | AG        |
| A     | TAATCAAT   | AC | CT     | TTGTTG  | GCAGTCT | TAA                   | TGAG      | AG        |
| ATC   | CTAGTT     |    |        | TTG     | GT      | GTCT                  | CTAA      | GGAG      |
| .     | C          | CG | CC     | CTGCCC  | CCTGGCT | CCGC                  | AGAG      | AG        |
| G     | CTACTTGGT  | GT | CC     | TCGATCT | CAACCT  | CAGT                  | AGAG      | CA        |
| .     | TAATTGGC   | AT | CA     | TTGTTG  | TCAGTCT | CAGC                  | AGAG      | AG        |
| A     | ATAACTTGT  | AG | CC     | TTGTTG  | GTATCT  | TGGA                  | GGCC      | AA        |
| .     | C          | AC | CC     | TTGTTG  | GTATCT  | TTG                   | GCCA      | AG        |
| .     | AATTGGC    | AC | CA     | CTGTTG  | ACAGTCT | CAAA                  | TGAG      | AG        |
| A     | CAATTGGT   | AC | CC     | TTGTTG  | GTACTCA | CAGC                  | AGAG      | AG        |
| A     | CCACACAG   | GC | TG     | TTGTTG  | G       | CAGT                  | AGAT      | AGTGTGCTT |
| AAATA | TATATTGCT  | CT | TGTGCC | TTGAA   | ACAGTCT | ATTAGGACATCATTGTATATA | CAAC      | ATGG      |
| .     |            |    |        |         |         |                       |           | GT        |
| T     | TTACTTG    |    | AT     | TTCCCA  | GTAGTTG | TTCC                  | CAGA      | AG        |
| .     | TTGGC      | AT | CT     | TTCTTG  | GCAGTCT | CAGA                  | GGAA      | AG        |
| .     | GAATTGAT   | TG |        |         |         |                       |           | AG        |
| A     | GTA        |    | CC     | CTAATA  | GTGTTT  | GTGG                  | AGA       | AG        |
| A     | CTCATGGGC  | AC | CC     | TTCTTG  | GCAGCCT | CAGC                  | AGAG      | GG        |
| .     |            |    |        |         |         |                       |           | AG        |
| A     | GTA        |    | CC     | CTAATA  | GTGTTT  | GT                    | AGA       | AG        |
| A     | ATTGAC     | AA | CT     | TTCTTG  | GCAGTCT | CAGG                  | GGAG      | AG        |
| .     | TTGGT      | AA | TT     | TTGTTT  |         | C                     | AGAG      | AG        |
| A     | CT         |    | C      | TTGTTG  | GTACTCC | CAGC                  | AGAG      | AG        |
| A     | CTAATTGGC  | AC | CA     | CTGTTG  | GCAGTCT | CAGC                  | TGAG      | AG        |
| C     | CCCCGTG    |    |        | TTGTTG  | GCAGTCT | CGGC                  | TGAG      | GC        |
| C     | CCCCGTG    |    |        | TTGTTG  | GCAGTCT | CGGC                  | TGAG      | GC        |
| C     | CCCCGTG    | C  | CG     | GTGTTG  | GCAGTCT | CGGC                  | TGAG      | GC        |
| C     | CCCCGTG    | C  | CG     | GTGTTG  | GCAGTCT | CGGC                  | TGAG      | GC        |
| A     | GTGATTGATT | AT | CT     | CTG     |         | TAGC                  | TTAA      | A         |
| A     | GTGATTGATT | AT | CT     | CTG     |         | TAGC                  | TTAA      | A         |
| T     | TTAGGTGA   |    |        | TTG     | ATTATAT | CTGC                  | TTAGCTTAA |           |
| A     | GTGATTGATT | AT | CT     | CTG     |         | AGC                   | TTAA      | AC        |
| A     | GTGATTGATT | AT | CT     | CTG     |         | AGC                   | TTAA      | AT        |
| T     | TTA        |    | CA     | TGATTG  | ATTCTCT | CTGC                  | CTAGCTCAA |           |
| T     | TATTTTGC   | AT | GA     | TTGATG  | GCTCTGC | CTTA                  | ACTA      | AG        |
| C     | ATGATTGAT  | AG | TG     | TTACTG  | TTAGCTT |                       |           | AA        |
| A     | TTAATGGC   | AC | TT     | CTGTTG  | GCAGCGT | CAGC                  | CGAG      | AG        |
| A     | TTAATGGC   | AC | TT     | CTGTTG  | GCAGCGT | CAGC                  | CGAG      | AG        |
| A     | TTAATGGC   | AC | TT     | CTGTTG  | GCAGCGT | CAGC                  | CGAG      | AG        |
| A     | TTAATGGC   | AC | TT     | CTGTTG  | GCAGCGT | CAGC                  | CGAG      | AG        |
| A     | TTAATGGC   | AC | TT     | CTGTTG  | GCAGCGA | CAGC                  | CGAG      | AG        |
| A     | TTAATGGC   | AC | TT     | TTGTTG  | GCAGCGT | CAGC                  | CGAG      | AA        |

Figure S14: LF-SINE reconstruction (contd).



|               |        |               |    |     |     |   |             |     |            |    |    |    |    |   |           |         |   |
|---------------|--------|---------------|----|-----|-----|---|-------------|-----|------------|----|----|----|----|---|-----------|---------|---|
| LF-SINE       | CCC    |               | AA | GC  | ATT | G |             | AAT |            | G  | GG | CC | AA | A | TT        | GGAGACT | G |
| LF-SINE2      | GCC    |               | AA | GC  | ATT | G |             | AAT |            | G  | GG | CC | AA | A | TT        | GGAGACT | G |
| Coelacanth0   | GCC    |               | AA | GC  | ATT | G |             | AAT |            | G  | GG | CC | AA | A | TT        | GGAGACT | G |
| Coelacanth1   | GCC    |               | AA | GG  | ATT | G |             | AAT |            | G  | GG | CC | AA | A | TT        | GGAGACT | G |
| Coelacanth2   | GCT    |               | AA | GG  | ATT | G |             | AAT |            | G  | GG | CC | AA | A | TT        | GGAGACT | G |
| Coelacanth3   | GCT    |               | AA | GA  | ATT | G |             | AAT |            | G  | GG | CC | AA | A | TT        | GGAGACT | G |
| Coelacanth4   | GCC    |               | AA | GG  | ATT | G |             | AAT |            | G  | GG | CC | AA | A | TT        | GGAGACT | G |
| Coelacanth5   | GCC    |               | AA | GGG | ATT | G |             | AAT |            | G  | GG | CC | AA | A | TT        | GGAGACT | G |
| Coelacanth6   | ACC    |               | AA | GG  | ATT | G |             | AAT |            | G  | GG | CC | AA | A | TT        | GGAGACT | G |
| Coelacanth7   | GCC    |               | AA | GG  | ATT | G |             | AAT |            | G  | GG | CC | AA | A | TT        | GGAGACT | G |
| Coelacanth8   | GCC    |               | AG | GG  | ATT | G |             | AAT |            | G  | GG | CC | AA | A | TT        | GGAGACT | G |
| Coelacanth9   | GCC    |               | AA | GG  | ATT | G |             | AAT |            | G  | GG | CC | AA | A | TT        | GGAGACT | G |
| Coelacanth10  | GCC    |               | AA | GG  | ATT | G |             | AAT |            | G  | GG | CC | AA | A | TT        | GGAGACT | G |
| Coelacanth11  | GCC    |               | AA | GG  | ATT | G |             | AAT |            | G  | GG | CC | AA | A | TT        | GGAGACT | G |
| Coelacanth12  | GCC    |               | AA | GG  | ATT | G |             | AAT |            | G  | GG | CC | AA | A | TT        | GGAGACT | G |
| Coelacanth13  | ACC    |               | AA | GG  | ATT | G |             | AAT |            | G  | GG | CC | AA | A | TT        | GGAGACT | G |
| Coelacanth14  | GCA    | CAG           | AA | AG  | ATT | G |             | AAT |            | G  | GG | CC | AA | A | TT        | GGAGACT | G |
| Coelacanth15  | GCC    |               | AA | AG  | ATT | G |             | AAT |            | G  | GG | CC | AA | A | TT        | GGAGACT | G |
| Coelacanth16  | GCC    |               | AA | GGG | ATT | G |             | AAT |            | G  | GG | CC | AA | A | TT        | GGAGACT | G |
| Coelacanth17  | GCC    |               | AA | AA  | ATT | G |             | AAT |            | G  | GG | CC | AA | A | TT        | GGAGACT | G |
| Coelacanth18  | TCC    |               | AA | AG  | ATT | G |             | AAT |            | G  | GG | CC | AA | A | TT        | GGAGACT | G |
| Coelacanth19  | GTT    |               | AA | GA  | ATT | G |             | AAT |            | G  | GG | CC | AA | A | TT        | GGAGACT | G |
| Coelacanth20  | GCC    |               | AA | GG  | ATT | G |             | AAT |            | G  | GG | CC | AA | A | TT        | GGAGACT | G |
| Coelacanth21  | GCC    |               | AA | GG  | ATT | G |             | AAT |            | G  | GG | CC | AA | A | TT        | GGAGACT | G |
| Coelacanth22  | GCC    |               | AA | GG  | ATT | G |             | AAT |            | G  | GG | CC | AA | A | TT        | GGAGACT | G |
| Coelacanth23  | GCC    |               | AA | GG  | ATT | G |             | AAT |            | G  | GG | CC | AA | A | TT        | GGAGACT | G |
| Coelacanth24  | TTC    |               | AA | GG  | ATT | G |             | AAT |            | G  | GG | CC | AA | A | TT        | GGAGACT | G |
| Coelacanth25  | GCC    |               | AA | GG  | ATT | G |             | AAT |            | G  | GG | CC | AA | A | TT        | GGAGACT | G |
| Coelacanth26  | ACC    |               | AA | AG  | ATT | G |             | AAT |            | G  | GG | CC | AA | A | TT        | GGAGACT | G |
| Coelacanth27  | GCC    |               | AA | GG  | ATT | G |             | AAT |            | G  | GG | CC | AA | A | TT        | GGAGACT | G |
| Coelacanth28  | ATC    |               | AA | GG  | ATT | G |             | AAT |            | G  | GG | CC | AA | A | TT        | GGAGACT | G |
| Coelacanth29  | GCC    | C             | AA | GC  | ATT | G |             | AAT |            | G  | GG | CC | AA | A | TT        | GGAGACT | G |
| Coelacanth30  | GCT    |               | AA | GG  | ATT | G |             | AAT |            | G  | GG | CC | AA | A | TT        | GGAGACT | G |
| Coelacanth31  | GCC    |               | AA | GT  | ATT | G |             | AAT |            | G  | GG | CC | AA | A | TT        | GGAGACT | G |
| Coelacanth32  | GAG    |               | AA | GG  | ATT | G |             | AAT |            | G  | GG | CC | AA | A | TT        | GGAGACT | G |
| Coelacanth33  | TCC    |               | AA | GG  | ATT | G |             | AAT |            | G  | GG | CC | AA | A | TT        | GGAGACT | G |
| Coelacanth34  | CCC    |               | AA | GG  | ATT | G |             | AAT |            | G  | GG | CC | AA | A | TT        | GGAGACT | G |
| Coelacanth35  | ACA    |               | AA | GG  | ATT | G |             | AAT |            | G  | GG | CC | AA | A | TT        | GGAGACT | G |
| Coelacanth36  | GCC    |               | AA | GG  | ATT | G |             | AAT |            | G  | GG | CC | AA | A | TT        | GGAGACT | G |
| Coelacanth37  | GHC    |               | AA | GG  | ATT | G |             | AAT |            | G  | GG | CC | AA | A | TT        | GGAGACT | G |
| Coelacanth38  | GCC    |               | AG | GG  | ATT | G |             | AAT |            | G  | GG | CC | AA | A | TT        | GGAGACT | G |
| Coelacanth39  | CCC    |               | AA | GA  | ATT | G |             | AAT |            | G  | GG | CC | AA | A | TT        | GGAGACT | G |
| Coelacanth40  | TAC    |               | AG | GG  | ATT | G |             | AAT |            | G  | GG | CC | AA | A | TT        | GGAGACT | G |
| Coelacanth41  | CCC    |               | AA | GC  | ATT | G |             | AAT |            | G  | GG | CC | AA | A | TT        | GGAGACT | G |
| Coelacanth42  | GCC    |               | AA | GC  | ATT | G |             | AAT |            | G  | GG | CC | AA | A | TT        | GGAGACT | G |
| Coelacanth43  | GCTTCC |               | AA | G   | TC  | A |             | AAT |            | G  | GG | CC | AA | A | TT        | GGAGACT | G |
| Coelacanth44  | GTC    | CCTTATTTTGCAC | AA | AA  | ATT | G | GCAGTCCTACC | AAT |            | G  | CA | GA | AA | A | TT        | GGAGACT | G |
| Coelacanth45  |        |               |    |     |     |   |             |     |            |    |    |    |    |   |           |         |   |
| Coelacanth46  | GCC    |               | TT | GG  | AAC | A |             | AGT |            | A  | AG | C  | T  | T | AAAGGCT   | G       |   |
| Coelacanth47  | GAC    |               | AT | TG  | ATT | A |             | CCA |            | A  | AG | C  | T  | T | CCAGACT   | G       |   |
| Coelacanth48  | GCA    |               | AA | GG  | CTT | A |             | AAA |            | G  | GA | G  | T  | T | GGTTTCT   | G       |   |
| Coelacanth49  |        |               |    |     |     |   |             |     |            |    |    |    |    |   | GGAGACT   | T       |   |
| Coelacanth50  |        |               |    |     |     |   |             |     |            |    |    |    |    |   | AGAGT     | C       |   |
| Coelacanth51  | GCC    |               | AT | TC  | ATT | G |             | TAA |            | C  | AG | C  | A  | A | CCAGACT   | G       |   |
| Coelacanth52  | CCC    |               | AA | GG  | TTT | G |             | AAT |            | G  | AG | C  | A  | A | GGAAACCTA | G       |   |
| Coelacanth53  |        |               |    |     |     |   |             |     |            |    |    |    |    |   |           |         |   |
| Coelacanth54  | GCC    |               | AT | TC  | ATT | G |             | TAA |            | C  | AG | C  | A  | A | CCAGACT   | G       |   |
| Coelacanth55  | CCC    |               | AA | GG  | ATT | A |             | AAT | AAATTGAAAA | GG | G  | G  | C  | T | TCTCT     | G       |   |
| Coelacanth56  | ATC    |               | TC | AG  | GCC | A |             | TAT |            | A  | AG | C  | A  | A | TGAGGCT   | G       |   |
| Coelacanth57  | GCC    |               | AA |     |     |   |             |     |            |    |    |    |    |   |           |         |   |
| Coelacanth58  |        |               |    |     |     |   |             |     |            |    |    |    |    |   |           |         |   |
| OutGroup      | GCC    |               | AA | GC  | ATT | G |             | AAT |            | G  | GG | CC | AA | A | TT        | GGAGACT | G |
| PCBP2-Human   | GG     |               | AA | GG  | ATT | G |             | AGT |            | G  | GG | CC | AA | A | TT        | GGAGACT | G |
| PCBP2-Chimp   | GG     |               | AA | GG  | ATT | G |             | AGT |            | G  | GG | CC | AA | A | TT        | GGAGACT | G |
| PCBP2-Dog     | GG     |               | AA | GG  | ATT | G |             | AGT |            | G  | GG | CC | AA | A | TT        | GGAGACT | G |
| PCBP2-Mouse   | GG     |               | AA | GG  | ATT | G |             | AGT |            | G  | GG | CC | AA | A | TT        | GGAGACT | G |
| PCBP2-Rat     | GG     |               | AA | GG  | ATT | G |             | AGT |            | G  | GG | CC | AA | A | TT        | GGAGACT | G |
| PCBP2-Opossum | GG     |               | AA | GG  | ATT | G |             | AGT |            | G  | GG | CC | AA | A | TT        | GGAGACT | G |
| ISL1-Human    | CT     |               | CA | GG  | GTT | G |             | AGT |            | C  | AG | C  | C  | A | AAGGACT   | T       |   |
| ISL1-Chimp    | CT     |               | CA | GG  | GTT | G |             | AGT |            | C  | AG | C  | C  | A | AAGGACT   | T       |   |
| ISL1-Dog      | ACT    |               | CA | GG  | GTT | G |             | AGT |            | C  | AG | C  | C  | A | AAGGACT   | T       |   |
| ISL1-Mouse    | TCT    |               | CA | GG  | GTT | G |             | AGT |            | C  | AG | C  | C  | A | AAGGACT   | T       |   |
| ISL1-Rat      | GCT    |               | CA | GG  | GTT | G |             | AGT |            | T  | AG | C  | C  | A | AAGGACT   | T       |   |
| ISL1-Opossum  | ACT    |               | CA | GG  | GTT | G |             | AGT |            | C  | AG | C  | C  | A | AAGGACT   | T       |   |
| ISL1-Chicken  | ACC    |               | CA | GG  | GTT | G |             | AGT |            | C  | AG | C  | C  | A | AAGGACT   | T       |   |
| ISL1-Frog     | ACT    |               | CT | TG  | GTT | C |             | AGC |            | T  | AG | C  | C  | A | AAGGACT   | T       |   |
| DACH1-Human   | GCT    |               | GA | AG  | ATT | G |             | AAT |            | G  | GG | CC | AA | A | TT        | GGAGACT | G |
| DACH1-Chimp   | GCT    |               | GA | AG  | ATT | G |             | AAT |            | G  | GG | CC | AA | A | TT        | GGAGACT | G |
| DACH1-Dog     | GCT    |               | GC | AG  | ATT | G |             | AAT |            | G  | GG | CC | AA | A | TT        | GGAGACT | G |
| DACH1-Mouse   | GCT    |               | GA | AG  | ATT | G |             | AAT |            | G  | GG | CC | AA | A | TT        | GGAGACT | G |
| DACH1-Rat     | GCC    |               | GA | AG  | ATT | G |             | AAT |            | G  | GG | CC | AA | A | TT        | GGAGACT | G |
| DACH1-Opossum | GCT    |               | GA | AG  | ATT | G |             | AAT |            | A  | GG | CC | AA | A | TT        | GGAGACT | G |

Figure S14: LF-SINE reconstruction (contd).



|               |                 |            |          |     |           |      |              |          |       |       |    |
|---------------|-----------------|------------|----------|-----|-----------|------|--------------|----------|-------|-------|----|
| LF-SINE       | GGTT            | GA         | GGCACAT  | TG  | GCAG      | GG   | CAATGTG      | GGAA     | GC    | CT    |    |
| LF-SINE2      | GGTT            | GA         | GGCACAT  | TG  | GCAG      | GG   | CAATGTG      | GGAA     | GC    | CT    |    |
| Coelacanth0   | GGTT            | GA         | GGTACAT  | TG  | GCAG      | GG   | CAATGTG      | GGAA     | GC    | CT    |    |
| Coelacanth1   | GGTT            | AA         | GGTACAT  | TG  | GTGG      | GG   | CAAGGTG      | GGAA     | GC    | CT    |    |
| Coelacanth2   | AGTT            | GA         | GGCACAT  | TG  | GCAG      | GG   | CAATGTG      | GGAA     | GC    | CT    |    |
| Coelacanth3   | AGTT            | GA         | GGTACAC  | TG  | GCTG      | GA   | CAATGTG      | GGAA     | GC    | CT    |    |
| Coelacanth4   | GGTT            | GA         | GGCACAT  | TG  | GCAG      | GA   | CAATGTG      | GGAA     | GC    | CT    |    |
| Coelacanth5   | GGTT            | GA         | GGCACAT  | TG  | GTGG      | GG   | CAATGTG      | GGAA     | GT    | CT    |    |
| Coelacanth6   | AGTT            | GA         | TGAGCAT  | TG  | GCAG      | GA   | CAGCATG      | GGAG     | GC    | CT    |    |
| Coelacanth7   | GGGA            | GG         | GGCACAT  | TG  | GCAG      | GG   | CAACATG      | GGAA     | GC    | CT    |    |
| Coelacanth8   | GGTA            | GA         | GGCACAT  | TG  | G.GG      | GG   | AAATGTG      | GGAA     | GC    | CT    |    |
| Coelacanth9   | GATT            | GA         | GGCACAC  | TG  | GTGG      | GG   | TAATATG      | GGAA     | GC    | CT    |    |
| Coelacanth10  | GGCT            | GA         | GGCACAT  | TG  | GCAG      | GG   | CAATGTG      | GGAA     | GC    | CT    |    |
| Coelacanth11  | GGTC            | AA         | GGCACAT  | TG  | GCAG      | GG   | TAATGTG      | GGAA     | GC    | CT    |    |
| Coelacanth12  | GGTT            | GA         | AGCACAT  | TG  | GCAG      | GG   | TGTGT        | AGAA     | AG    | CT    |    |
| Coelacanth13  | GGCT            | GA         | AGCACAT  | TA  | CAAG      | GG   | CAGTATG      | GGATG    | GC    | AC    |    |
| Coelacanth14  | GGTT            | GA         | AGCACAT  | AG  | GTGG      | GG   | CAATGTG      | GGAT     | GC    | CT    |    |
| Coelacanth15  | GATC            | AA         | AGCACAT  | AA  | GCAG      | GG   | CAAGGTG      | GGAA     | GT    | CC    |    |
| Coelacanth16  | GGTT            | GA         | GGCACAT  | TT  | GTGG      | GG   | CAATGTG      | GGAA     | GT    | CT    |    |
| Coelacanth17  | GGCT            | GA         | GGCACAC  | TG  | GTAG      | GG   | CAATGTG      | GGAA     | GC    | CT    |    |
| Coelacanth18  | TATT            | AA         | GGCACAT  | TG  | GT.G      | GG   | CAATGTG      | GGAA     | GC    | CT    |    |
| Coelacanth19  | TGTT            | GA         | GGACAT   | TG  | GCGG      | GG   | CAATGTG      | GGAA     | GC    | TT    |    |
| Coelacanth20  | GGTT            | GA         | GGCACAT  | TG  | GC.G      | GA   | AAATGTG      | GGAA     | GC    | CT    |    |
| Coelacanth21  | GATT            | GA         | GGCACAT  | TG  | ACAG      | GG   | CAGTGTG      | GAGAA    | GC    | CT    |    |
| Coelacanth22  | GATT            | GA         | TGCACAT  | TG  | GTAG      | GG   | CACGTGTG     | GAGAA    | GA    | CT    |    |
| Coelacanth23  | GGTT            | GA         | GGCACAT  | TT  | GCA.      | AA   | CAGTGTG      | GGG.     |       |       |    |
| Coelacanth24  | GGTT            | GA         | AGCACAC  | TG  | GT.G      | GG   | CAATGTG      | GGAA     | GC    | CT    |    |
| Coelacanth25  | GGTT            | GA         | GGCACAT  | TG  | GCAG      | GG   | CAATGGG      | GG.      | GT    | CT    |    |
| Coelacanth26  | GGTT            | CA         | GGCACAC  | AG  | GAGG      | GG   | TAATATG      | TCAGT    | TC    | TC    |    |
| Coelacanth27  | GGTT            | GA         | GGCACAA  | TG  | GCAG      | GG   | CAATGTG      | GGAA     | GC    | CC    |    |
| Coelacanth28  | AGTT            | GA         | GGCACAT  | TG  | GCAG      | GA   | CAGTATT      | AGAA     | GC    | TT    |    |
| Coelacanth29  | GGTT            | GA         | GGCACAT  | AG  | GTAG      | TA   | CAGTTGG      | AGAA     | GC    | CT    |    |
| Coelacanth30  | GACT            | GA         | AGCACAT  | TG  | ACAG      | GA   | AAATATG      | GGAA     | GC    | TT    |    |
| Coelacanth31  | GGTT            | GA         | GGCACAT  | TG  | GCAATA    | AG   | CAATGTG      | GGAA     | GC    | CT    |    |
| Coelacanth32  | GGTT            | GT         | GTCACAT  | TG  | GTGG      | GGG  | CAGTGTA      | GGAA     | GC    | TG    |    |
| Coelacanth33  | AGTT            | GA         | AACACT   | TG  | GTGG      | GG   | CACGTGTG     | AGAA     | GA    | CT    |    |
| Coelacanth34  | GGCC            | GA         | GGTACGC  | TG  | TATGT     | AG   | TGCTGTG      | GGGA     | GC    | CT    |    |
| Coelacanth35  | GGTT            | GA         | GGCACAT  | TG  | GTGG      | GT   | CAGTGTG      | TAGTA    | GT    | TC    |    |
| Coelacanth36  | GGTT            | GA         | GGCACAT  | TC  | AAAG      | GG   | CAGTGTG      | GGAA     | GC    | TT    |    |
| Coelacanth37  | GGAT            | GA         | GGTACAG  | TG  | GTGG      | GC   | CAGTGTGTGTGT | GGAA     | GG    | GG    |    |
| Coelacanth38  | GGTT            | GA         | GGTACCT  | AG  | TCAGTACAG | GG   | TAATCAG      | TAGAA    | GC    | TT    |    |
| Coelacanth39  | AGTT            | GA         | GGCTCAG  | TG  | GCAG      | GG   | TGATATG      | GGAA     | GC    | CT    |    |
| Coelacanth40  | AGTT            | AA         | AGCCCAT  | TG  | GC.       | GT   | CTAGAGG      | TAGAA    | GG    | CT    |    |
| Coelacanth41  | GGCTGGAGGCTGCCA | GA         | GGCCACC  | AG  | TGGG      | GT   | CCAGGGG      | CCAAA    | GC    | CC    |    |
| Coelacanth42  |                 | GA         | GGCACAT  | TG  | GCAG      | GG   | CAATAGA      | GGAA     | GC    | AT    |    |
| Coelacanth43  |                 | C          | AACACTC  | TG  | GCAT      | GG   | CATCTCG      | GGCA     | GG    | CT    |    |
| Coelacanth44  | CACAGCA         | GA         | GGGGCA   | AG  | GTIT      | GA   | ATGACCA      | TGAA     | AG    | CC    |    |
| Coelacanth45  | TT              | GA         | TGC      | CAA | TG        | GTAA | GG           | CAATGTG  | GGAA  | GC    | CT |
| Coelacanth46  | GGTT            | G.         |          | TG  | ACAA      | GC   | CAATATC      | AC       | AA    | GC    | AT |
| Coelacanth47  | GGTT            | GA         | AAGATC   | TC  | AGAG      | G.   | CAATGTG      | GTAC     | AC    | TT    |    |
| Coelacanth48  | GGTT            | AC         | TGTGATC  | TC  | ATGA      | GG   | CAGTGTG      | AAGAT    | AT    | CT    |    |
| Coelacanth49  | GGTT            | GA         | GGCACAC  | TG  | GCAG      | GG   | CAA          |          |       | GC    | CT |
| Coelacanth50  | GGTT            | CA         | GGCACAT  | TG  | GCAA      | GG   | AAATGTG      | GGAA     | GC    | CC    |    |
| Coelacanth51  | GGTT            | GA         | AGGAT    | T   | AAAA      | AG   | GAAAGAA      | GAGAT    | AC    | CT    |    |
| Coelacanth52  |                 |            |          |     |           |      |              |          |       |       |    |
| Coelacanth53  | GTC             | GATTGCATTG | GGCACAT  | TG  | GCAG      | GG   | CAATGTG      | GGAA     | GC    | CT    |    |
| Coelacanth54  | GGTT            | GA         | AAGAT    | T   | AAAA      | AG   | AAAGAA       | GAGAT    | AC    | CT    |    |
| Coelacanth55  | GGT             | GA         | GGCACAT  | TG  | ACAG      | CC   | CTGTGAG      | AGAA     | G     |       |    |
| Coelacanth56  | GGTT            | GA         | GACTTAC  | TG  | GCGG      | AG   |              |          |       |       |    |
| Coelacanth57  |                 |            |          |     |           |      |              |          |       |       |    |
| Coelacanth58  |                 |            |          |     |           |      |              |          |       |       |    |
| OutGroup      | GGTT            | GA         | GGCACAT  | TG  | GCAG      | GG   | CAATGTG      | GGAA     | GC    | CT    |    |
| PCBP2-Human   | GGTT            | GA         | GGCACAT  | GG  | ACGG      | GG   | TGGTGTG      | GGGAAAGC |       | TC    |    |
| PCBP2-Chimp   | GGTT            | GA         | GGCACAT  | GG  | ACGG      | GG   | TGGTGTG      | GGGAAAGC |       | TC    |    |
| PCBP2-Dog     | GGTT            | GA         | GGCACAT  | GG  | ACGG      | GG   | TGGTGTG      | GGGAAAGC |       | TC    |    |
| PCBP2-Mouse   | GGTT            | GA         | GGCACAT  | GG  | ACGG      | GG   | TGGTGTG      | GGGAAAGC |       | TC    |    |
| PCBP2-Rat     | GGTT            | GA         | GGCACAT  | GG  | ACGG      | GG   | TGGTGTG      | GGGAAAGC |       | TC    |    |
| PCBP2-Opossum | GGTT            | GA         | GGCACAT  | GG  | ACGG      | GG   | TGGTGTG      | GGGAAAGC |       | TC    |    |
| ISL1-Human    | AGTC            | GA         | GGT.CAA  | TA  | ATAG      | GG   | CA           | GGAA     | G     |       |    |
| ISL1-Chimp    | AGTC            | GA         | GGT.CAA  | TA  | ATAG      | GG   | CA           | GGAA     | G     |       |    |
| ISL1-Dog      | AGTC            | GA         | GGT.CAA  | TA  | ATAG      | GG   | CA           | GGAA     | G     |       |    |
| ISL1-Mouse    | AGTC            | GA         | GGT.CAA  | TA  | ATAG      | GG   | CA           | SAAA     | G     |       |    |
| ISL1-Rat      | AGTC            | GA         | GGT.CAA  | TA  | ATAG      | GG   | CA           | SAAA     | G     |       |    |
| ISL1-Opossum  | ACTC            | GA         | GGT.CAA  | TA  | ATAG      | GG   | CAA          | GAGAA    | GC    |       |    |
| ISL1-Chicken  | ACTC            | GA         | GGT.CAA  | TA  | GTAG      | GA   | CA           | GGAA     | G     |       |    |
| ISL1-Frog     | AGCC            | GA         | GGT.CAA  | TA  | GCAG      | GA   | CA           |          |       |       |    |
| DACH1-Human   | GGA             | GA         | AGCACATG | TC  | ACAG      | TG   | CATGTGTG     | GGAG     | G     |       |    |
| DACH1-Chimp   | GGA             | GA         | AGCACATG | TC  | ACAG      | TG   | CATGTGTG     | GGAG     | G     |       |    |
| DACH1-Dog     | GGTG            | CA         | GGTGAG   | GT  | GCAG      | GG   | GGTGCA       | GGGTCA   | CGGTG | CT    | CG |
| DACH1-Mouse   | AGAT            | GA         | AGCATCC  | GGC | GCGG      | TG   | CTGTGCG      | GGAG     | G     |       |    |
| DACH1-Rat     | AGAT            | GA         | AGCGTCC  | AGC | GCTG      | TG   | CTGTGCG      | GGAG     | G     | CGACT |    |
| DACH1-Opossum | AGAT            | GA         | AGCACAT  | TA  | GCA       | GG   | CATGTGTG     | GGAA     | TC    | CG    |    |

Figure S14: LF-SINE reconstruction (contd).

```

LF-SINE      .GCACCT .GC .H GCTG .G .AT GC .GTAC .CTGTCTG
LF-SINE2    .GCACCT .GC .H GCTG .G .AT GC .GTAC .CTGTCTG
Coelacanth0 .GCACCT .GC .H GCTG .G .AT GC .GTAC .CTGTCTG
Coelacanth1 .GCACCT .GC .H GCTG .G .AT GC .GTAC .CTGTCTG
Coelacanth2 .GCACCT .GC .H GCTG .G .AT GC .GTAC .CTGTCTG
Coelacanth3 .GCACCT .GC .H GCTG .G .AT GC .GTAC .CTGTCTG
Coelacanth4 .GCACCT .GC .H GCTG .G .AT GC .GTAC .CTGTCTG
Coelacanth5 .GCACCT .GC .H GCTG .G .AT GC .GTAC .CTGTCTG
Coelacanth6 .GCACCT .GC .H GCTG .G .AT GC .GTAC .CTGTCTG
Coelacanth7 .GCA .GC .H GCTG .G .AT GC .GTAC .CTGTCTG
Coelacanth8 .GCACCT .GC .H GCTG .G .AT GC .GTAC .CTGTCTG
Coelacanth9 .GCACCT .GC .H GCTG .G .AT GC .GTAC .CTGTCTG
Coelacanth10 .GTACT .GC .H GCTG .G .AT GC .GTAC .CTGTCTG
Coelacanth11 .ACTGT .GC .H GCTG .G .AT GC .GTAC .CTGTCTG
Coelacanth12 .GCTCT .GC .H GCTG .G .AT GC .GTAC .CTGTCTG
Coelacanth13 .ACAC .GC .H GCTG .G .AT GC .GTAC .CTGTCTG
Coelacanth14 .GCACCT .GC .H GCTG .G .AT GC .GTAC .CTGTCTG
Coelacanth15 .GCACCT .GC .H GCTG .G .AT GC .GTAC .CTGTCTG
Coelacanth16 .ACACT .GC .H GCTG .G .AT GC .GTAC .CTGTCTG
Coelacanth17 .GCACCT .GC .H GCTG .G .AT GC .GTAC .CTGTCTG
Coelacanth18 .GCACCT .GC .H GCTG .G .AT GC .GTAC .CTGTCTG
Coelacanth19 .GCACCT .GC .H GCTG .G .AT GC .GTAC .CTGTCTG
Coelacanth20 .GAAT .GC .H GCTG .G .AT GC .GTAC .CTGTCTG
Coelacanth21 .GCACCT .GC .H GCTG .G .AT GC .GTAC .CTGTCTG
Coelacanth22 .G .GC .H GCTG .G .AT GC .GTAC .CTGTCTG
Coelacanth23 .GC .GC .H GCTG .G .AT GC .GTAC .CTGTCTG
Coelacanth24 .GCACCT .GC .H GCTG .G .AT GC .GTAC .CTGTCTG
Coelacanth25 .ACACT .GC .H GCTG .G .AT GC .GTAC .CTGTCTG
Coelacanth26 .ACACT .GC .H GCTG .G .AT GC .GTAC .CTGTCTG
Coelacanth27 .ACACT .GC .H GCTG .G .AT GC .GTAC .CTGTCTG
Coelacanth28 .ACACT .GC .H GCTG .G .AT GC .GTAC .CTGTCTG
Coelacanth29 .GCATA .GC .H GCTG .G .AT GC .GTAC .CTGTCTG
Coelacanth30 .GCACCT .GC .H GCTG .G .AT GC .GTAC .CTGTCTG
Coelacanth31 .GCACCT .GC .H GCTG .G .AT GC .GTAC .CTGTCTG
Coelacanth32 .GCACCT .GC .H GCTG .G .AT GC .GTAC .CTGTCTG
Coelacanth33 .GCACCT .GC .H GCTG .G .AT GC .GTAC .CTGTCTG
Coelacanth34 .GCATG .GC .H GCTG .G .AT GC .GTAC .CTGTCTG
Coelacanth35 .GCAT .GC .H GCTG .G .AT GC .GTAC .CTGTCTG
Coelacanth36 .ACACT .GC .H GCTG .G .AT GC .GTAC .CTGTCTG
Coelacanth37 .GGGT .GC .H GCTG .G .AT GC .GTAC .CTGTCTG
Coelacanth38 .GCAT .GC .H GCTG .G .AT GC .GTAC .CTGTCTG
Coelacanth39 .ATA .GC .H GCTG .G .AT GC .GTAC .CTGTCTG
Coelacanth40 .CCATA .GC .H GCTG .G .AT GC .GTAC .CTGTCTG
Coelacanth41 .CCAT .GC .H GCTG .G .AT GC .GTAC .CTGTCTG
Coelacanth42 .GAAT .GC .H GCTG .G .AT GC .GTAC .CTGTCTG
Coelacanth43 .G .GC .H GCTG .G .AT GC .GTAC .CTGTCTG
Coelacanth44 .TAGAC .GC .H GCTG .G .AT GC .GTAC .CTGTCTG
Coelacanth45 .GTACT .GC .H GCTG .G .AT GC .GTAC .CTGTCTG
Coelacanth46 .GCAT .GC .H GCTG .G .AT GC .GTAC .CTGTCTG
Coelacanth47 .ATATG .GC .H GCTG .G .AT GC .GTAC .CTGTCTG
Coelacanth48 .GCA .GC .H GCTG .G .AT GC .GTAC .CTGTCTG
Coelacanth49 .GTACT .GC .H GCTG .G .AT GC .GTAC .CTGTCTG
Coelacanth50 .ACAT .GC .H GCTG .G .AT GC .GTAC .CTGTCTG
Coelacanth51 .ACAGA .GC .H GCTG .G .AT GC .GTAC .CTGTCTG
Coelacanth52 .GC .GC .H GCTG .G .AT GC .GTAC .CTGTCTG
Coelacanth53 .ATGCT .GC .H GCTG .G .AT GC .GTAC .CTGTCTG
Coelacanth54 .ACAGA .GC .H GCTG .G .AT GC .GTAC .CTGTCTG
Coelacanth55 .GC .GC .H GCTG .G .AT GC .GTAC .CTGTCTG
Coelacanth56 .CT .GC .H GCTG .G .AT GC .GTAC .CTGTCTG
Coelacanth57 .GC .GC .H GCTG .G .AT GC .GTAC .CTGTCTG
Coelacanth58 .GC .GC .H GCTG .G .AT GC .GTAC .CTGTCTG
OutGroup   .GCACCT .GC .H GCTG .G .AT GC .GTAC .CTGTCTG
PCBP2-Human .GCACCT .GC .H GCTG .G .AT GC .GTAC .CTGTCTG
PCBP2-Chimp .GCACCT .GC .H GCTG .G .AT GC .GTAC .CTGTCTG
PCBP2-Dog .GCACCT .GC .H GCTG .G .AT GC .GTAC .CTGTCTG
PCBP2-Mouse .GCACCT .GC .H GCTG .G .AT GC .GTAC .CTGTCTG
PCBP2-Rat .GCACCT .GC .H GCTG .G .AT GC .GTAC .CTGTCTG
PCBP2-Opossum .GCACCT .GC .H GCTG .G .AT GC .GTAC .CTGTCTG
ISL1-Human .GTACT .GC .H GCTG .G .AT GC .GTAC .CTGTCTG
ISL1-Chimp .GTACT .GC .H GCTG .G .AT GC .GTAC .CTGTCTG
ISL1-Dog .GTACT .GC .H GCTG .G .AT GC .GTAC .CTGTCTG
ISL1-Mouse .GTACT .GC .H GCTG .G .AT GC .GTAC .CTGTCTG
ISL1-Rat .GTACT .GC .H GCTG .G .AT GC .GTAC .CTGTCTG
ISL1-Opossum .CT .GC .H GCTG .G .AT GC .GTAC .CTGTCTG
ISL1-Chicken .GCACCT .GC .H GCTG .G .AT GC .GTAC .CTGTCTG
ISL1-Frog .GC .GC .H GCTG .G .AT GC .GTAC .CTGTCTG
DACH1-Human .TG .GC .H GCTG .G .AT GC .GTAC .CTGTCTG
DACH1-Chimp .G .GC .H GCTG .G .AT GC .GTAC .CTGTCTG
DACH1-Dog .GGAAG .GC .H GCTG .G .AT GC .GTAC .CTGTCTG
DACH1-Mouse .G .GC .H GCTG .G .AT GC .GTAC .CTGTCTG
DACH1-Rat .GCCG .GC .H GCTG .G .AT GC .GTAC .CTGTCTG
DACH1-Opossum .AGGCTGCTTCTGTGACTCCA .GC .H GCTG .G .AT GC .GTAC .CTGTCTG

```

Figure S14: LF-SINE reconstruction (contd).

|               |       |       |       |        |       |          |       |       |         |         |       |       |       |
|---------------|-------|-------|-------|--------|-------|----------|-------|-------|---------|---------|-------|-------|-------|
| LF-SINE       | TG    | CA    | T     | AAA    | TA    | CAGGAC   | T     | TC    | AGTC    | TCT     | GGTG  | CT    | ATCAA |
| LF-SINE2      | TG    | CA    | T     | AAA    | TA    | CAGGAC   | T     | TC    | AGTC    | TCT     | GGTG  | CT    | ATCAA |
| Coelacanth0   | TG    | CA    | T     | AAA    | TA    | CAGGAC   | T     | TC    | AGTC    | TCT     | GGTG  | CT    | ATCAA |
| Coelacanth1   | TG    | AA    | T     | AAA    | TA    | AAGGAC   | T     | TC    | AGTC    | TCT     | GGTG  | CT    | ATCAA |
| Coelacanth2   | TG    | CA    | T     | AAA    | TA    | CAGGAC   | T     | TC    | AGTC    | TCC     | AGTG  | CT    | ATCAA |
| Coelacanth3   | TG    | TA    | T     | AAA    | TG    | GAGGAC   | T     | TC    | AGTC    | TCT     | GGTG  | CT    | ATCAA |
| Coelacanth4   | TG    | GA    | T     | AAA    | TA    | CAGGAC   | T     | TC    | AGTC    | TCT     | GGTG  | CT    | ATCAA |
| Coelacanth5   | TG    | TA    | T     | AAA    | TA    | CAGGAC   | T     | TC    | AGTC    | TCT     | GGTG  | CT    | ATCAA |
| Coelacanth6   | TG    | GA    | A     | GGA    | TA    | ATAGAC   | T     | TC    | AGCT    | TCT     | GGTG  | CT    | ATCAA |
| Coelacanth7   | TG    | GA    | T     | AAA    | CA    | CAGGAC   | T     | TC    | AGTC    | TCT     | GGTG  | CC    | ATCAA |
| Coelacanth8   | TG    | GA    | T     | AAA    | TA    | CAGGAC   | T     | TC    | AGTC    | TCT     | GGTG  | CT    | ATCAA |
| Coelacanth9   | TG    | GA    | T     | AAA    | TA    | CAGGAC   | T     | TC    | AGTC    | TCT     | GGTG  | TT    | GTCAG |
| Coelacanth10  | TG    | GA    | T     | AAA    | TA    | CAGGAC   | T     | TC    | AGTC    | TCT     | GGTG  | CT    | ATCAA |
| Coelacanth11  | TG    | GA    | T     | AAA    | TA    | CAGGAC   | T     | TC    | AGTC    | TCT     | GGTG  | CT    | ATCAA |
| Coelacanth12  | TG    | CA    | T     | AAA    | TA    | CAGGAC   | T     | TC    | AGTC    | TCT     | GGTG  | CT    | ATCAA |
| Coelacanth13  | TG    | CA    | T     | AAA    | TA    | CAGGAC   | T     | TC    | AGTC    | TCT     | GGTG  | CT    | ATCAA |
| Coelacanth14  | TG    | CA    | T     | AAA    | TA    | CAGGAC   | T     | TC    | AGTC    | TCT     | GGTG  | CT    | ATCAA |
| Coelacanth15  | TG    | GA    | T     | AAA    | TA    | AAGGAC   | T     | TC    | AGTC    | TCT     | GGTG  | CT    | ATCAA |
| Coelacanth16  | TG    | GA    | T     | AAA    | TG    | GCAAGC   | T     | TC    | AGTC    | TCT     | GGTG  | CT    | ATCAA |
| Coelacanth17  | TG    | GA    | T     | GAC    | TA    | CAGGAC   | T     | TC    | AGTC    | TCT     | GGTG  | CT    | ATCAA |
| Coelacanth18  | TG    | GA    | T     | GCA    | TA    | ACTTAC   | T     | TC    | AGTC    | TCT     | GGTG  | CT    | ATCAA |
| Coelacanth19  | TT    | GAT   | T     | AAA    | CA    | GAGGCT   | T     | TC    | AGTC    | TCT     | GGTG  | CT    | ATCAA |
| Coelacanth20  | TT    | GA    | A     | AAA    | TA    | CAGGAC   | T     | TC    | AGTC    | TCT     | GGTG  | CT    | ATCAA |
| Coelacanth21  | TG    | AA    | T     | AAA    | TA    | CAGGAC   | T     | TC    | AGTC    | TCT     | GGTG  | CT    | ATCAA |
| Coelacanth22  | TG    | AA    | T     | AAA    | T     | AGGAC    | T     | TC    | AGTC    | TCT     | GGTG  | CT    | ATCAA |
| Coelacanth23  | TG    | GA    | T     | AAA    | TG    | CAGCAC   | T     | TC    | CTCT    | GCA     | GGGG  | CT    | GTCAG |
| Coelacanth24  | TG    | GA    | T     | AAG    | TA    | CAGGAT   | T     | TC    | AGTC    | TCT     | GGTG  | CT    | ATCAA |
| Coelacanth25  | TG    | G     | T     | G      | TA    | CAGCAC   | T     | TC    | AGTC    | TCT     | GGTG  | TT    | GTCAG |
| Coelacanth26  | TA    | AA    | A     | AAAAAT | CA    | AAGGCC   | T     | TC    | AGTC    | TCT     | GGGG  | CT    | GTCAG |
| Coelacanth27  | TG    | GA    | T     | AAA    | TA    | CAGCAC   | T     | TC    | AGTC    | TCT     | GGTG  | CT    | ATCAA |
| Coelacanth28  | TG    | AA    | A     | GAA    | TA    | CA       | T     | TC    | TTTC    | GCC     | AGTG  | CT    | ATCAA |
| Coelacanth29  | TG    | GG    | T     | AAA    | TG    | TAGAAA   | T     | TC    | AGTC    | TCT     | AGTA  | CT    | GCCAA |
| Coelacanth30  | TG    | GG    | T     | AAG    | TA    | TAGGAC   | T     | TC    | AGTC    | TCT     | AGTA  | CT    | ATCAA |
| Coelacanth31  | TG    | GA    | T     | AAG    | TA    | CAGGAC   | T     | TC    | AGTC    | TCT     | GGTG  | CT    | ATCAA |
| Coelacanth32  | TG    | GA    | T     | AAA    | TA    | AAGGAG   | T     | TC    | AGTC    | TCT     | GGTG  | CT    | ATCAA |
| Coelacanth33  | TT    | GG    | A     | TAA    | AA    | TAGGAT   | T     | TC    | GGTT    | TCT     | AGTG  | CT    | GTCAG |
| Coelacanth34  | TG    | GA    | T     | AC     | T     | AGGAC    | T     | TC    | AGTC    | TCT     | GGTG  | CT    | ATCAA |
| Coelacanth35  | TG    | GA    | T     | AAC    | TA    | CAGGAT   | T     | TC    | GGAC    | TCC     | GGTG  | CT    | ATCAA |
| Coelacanth36  | TG    | GA    | T     | AAA    | TA    | AAGGAC   | T     | TC    | AGTC    | TCC     | GGTG  | CT    | ATCAA |
| Coelacanth37  | TG    | GA    | C     | AAA    | TA    | CAGGAC   | T     | TC    | AGTC    | TCT     | GGTG  | CT    | ATCAA |
| Coelacanth38  | TG    | GG    | T     | TAA    | TA    | CAGGAC   | T     | TC    | AGTC    | TCC     | AGTG  | CT    | ATCAA |
| Coelacanth39  | CA    | GA    | T     | GAT    | CA    | CAGTA    | T     | TC    | CATT    | TCT     | AGTG  | CT    | ATCAA |
| Coelacanth40  | TG    | AG    | C     | AAA    | TC    | CAGCCC   | T     | TC    | GGCT    | GCT     | CCAG  | CT    | ATCAA |
| Coelacanth41  | TG    | A     | T     | AAA    | TC    | CAGCCC   | T     | TC    | CATT    | TCT     | GATA  | CT    | ATCAA |
| Coelacanth42  | TG    | TA    | T     | AAA    | TA    | CAGGAC   | T     | TC    | AGTC    | TCC     | AGTG  | CT    | ATCAA |
| Coelacanth43  | AG    | CA    | T     | AAA    | TC    | AAGTCC   | CTG   | TC    | AGTC    | TCT     | GGTG  | CT    | ATCAA |
| Coelacanth44  | TG    | GA    | T     | AAG    | TA    | CAGGAC   | T     | TC    | AGTC    | TCC     | AGTG  | CT    | ATCAA |
| Coelacanth45  | TG    | GA    | T     | AGG    | TA    | GATATC   | T     | TC    | AGTC    | TCC     | AGTG  | CT    | ATCAA |
| Coelacanth46  | TG    | GA    | A     | AAG    | TA    | CAGGAC   | T     | TC    | AGCT    | TCC     | AGTG  | CT    | ATCAA |
| Coelacanth47  | TG    | GA    | T     | AAA    | TA    | AAGTGA   | T     | TC    | ACTC    | TCA     | GATC  | CT    | ATCAA |
| Coelacanth48  | TG    | GA    | T     | AAA    | CA    | TAAAGAAA | T     | TC    | AAAC    | TC      | GGTG  | CT    | ATCAA |
| Coelacanth49  | TG    | GA    | T     | G      | T     | GAGGAC   | T     | TC    | AGTC    | TCT     | GGTG  | TG    | GAAAA |
| Coelacanth50  | TG    | AA    | T     | AAT    | TA    | ATACTC   | T     | TC    | ACTC    | TCT     | ATGG  | CT    | ATCAA |
| Coelacanth51  | TA    | AA    | C     | AAA    | TC    | AAGTGC   | T     | TC    | TATC    | CTC     | AGAT  | CT    | TGCAA |
| Coelacanth52  | ..... | ..... | ..... | .....  | ..... | .....    | ..... | ..... | .....   | .....   | ..... | ..... | ..... |
| Coelacanth53  | TG    | G     | T     | A      | TA    | CAGGAC   | T     | TC    | TATC    | TCT     | GGTG  | CT    | TTCAA |
| Coelacanth54  | TG    | AA    | T     | AAA    | TC    | AAGTGC   | T     | TC    | TATC    | TCT     | AGAT  | CT    | TGCAA |
| Coelacanth55  | ..... | ..... | ..... | .....  | ..... | .....    | ..... | ..... | .....   | .....   | ..... | ..... | ..... |
| Coelacanth56  | AG    | T     | ..... | AA     | GA    | AAGAAC   | T     | TC    | GTCAGGA | GGC     | AAAG  | CT    | CTCAG |
| Coelacanth57  | ..... | ..... | ..... | .....  | ..... | .....    | ..... | ..... | .....   | .....   | ..... | ..... | ..... |
| Coelacanth58  | ..... | ..... | ..... | .....  | ..... | .....    | ..... | ..... | .....   | .....   | ..... | ..... | ..... |
| OutGroup      | TG    | CA    | T     | AAA    | TA    | CAGGAC   | T     | TC    | AGTC    | TCT     | AGTG  | CT    | ATCAA |
| PCBP2-Human   | TG    | GA    | T     | AAA    | TA    | CAGGAT   | T     | TC    | AGTC    | TCC     | AGGG  | CT    | GTCAA |
| PCBP2-Chimp   | TG    | GA    | T     | AAA    | TA    | CAGGAT   | T     | TC    | AGTC    | TCC     | AGGG  | CT    | GTCAA |
| PCBP2-Dog     | TG    | GA    | T     | AAA    | TA    | CAGGAT   | T     | TC    | AGTC    | TCC     | AGGG  | CT    | GTCAA |
| PCBP2-Mouse   | TG    | GA    | T     | AAA    | TA    | CAGGAT   | T     | TC    | AGTC    | TCC     | AGGG  | CT    | GTCAA |
| PCBP2-Rat     | TG    | GA    | T     | AAA    | TA    | CAGGAT   | T     | TC    | AGTC    | TCC     | AGGG  | CT    | GTCAA |
| PCBP2-Opossum | TG    | GA    | T     | AAA    | TA    | CAGGAT   | T     | TC    | AGTC    | TCC     | AGGG  | CT    | GTCAA |
| ISL1-Human    | CA    | CT    | A     | GAA    | CA    | AAGAAC   | T     | TC    | ACTC    | CTC     | AGAG  | AT    | GCTGT |
| ISL1-Chimp    | CA    | CT    | A     | GAA    | CA    | AAGAAC   | T     | TC    | ACTC    | CTC     | AGAG  | AT    | GCTGT |
| ISL1-Dog      | AG    | CC    | A     | GAA    | CA    | AAGAAC   | T     | TC    | ACTC    | CTCAGAG | AG    | CT    | GTTTA |
| ISL1-Mouse    | CT    | A     | ..... | GAA    | CA    | AAGAAC   | T     | TC    | ACTT    | CTT     | AGAG  | AT    | GTTTA |
| ISL1-Rat      | CA    | CC    | A     | GAA    | CA    | AAGAAC   | T     | TC    | ACTT    | CTT     | AGAG  | AT    | GTTTA |
| ISL1-Opossum  | GT    | CT    | G     | AAA    | CA    | AAGGAC   | T     | TC    | ACTT    | TTT     | AGCT  | AT    | GTTGG |
| ISL1-Chicken  | TT    | CA    | TG    | AAA    | CA    | AAGAAC   | T     | TC    | ACTT    | TTA     | AGCT  | CT    | GTT   |
| ISL1-Frog     | ..... | ..... | ..... | .....  | ..... | .....    | ..... | ..... | .....   | .....   | ..... | ..... | ..... |
| DACH1-Human   | ..... | ..... | ..... | AAA    | CA    | CAGGAC   | A     | TC    | AGTT    | TGT     | AGTG  | TT    | CTCTG |
| DACH1-Chimp   | ..... | ..... | ..... | AAA    | CA    | CAGGAC   | A     | TC    | AGTT    | TGT     | AGTG  | TT    | CTCTG |
| DACH1-Dog     | TG    | ..... | ..... | GAG    | CA    | GGGGGC   | A     | GC    | AGTT    | CGG     | AGCG  | TG    | CTCGC |
| DACH1-Mouse   | TG    | TG    | T     | GAC    | CA    | CAGGAC   | A     | TC    | AGT     | .....   | ..... | ..... | ..... |
| DACH1-Rat     | ..... | ..... | ..... | .....  | ..... | .....    | ..... | ..... | .....   | .....   | ..... | ..... | ..... |
| DACH1-Opossum | ..... | ..... | ..... | AAA    | TA    | CAGGAC   | T     | TC    | AGTT    | TAT     | AGTGT | CT    | CTTAG |

Figure S14: LF-SINE reconstruction (contd).

|               |                 |         |         |                         |        |       |     |    |         |   |          |      |    |
|---------------|-----------------|---------|---------|-------------------------|--------|-------|-----|----|---------|---|----------|------|----|
| LF-SINE       | TCTA            | GCACCTT | TC      | ACGA                    | GCACCT | AAA   | T   | TC | A       | G | ACAA     | AA   |    |
| LF-SINE2      | TCTG            | GCACCTT | TC      | ACGA                    | GCACCT | AAA   | T   | TC | A       | A | ACAC     | AA   |    |
| Coelacanth0   | TCTG            | GCACCTT | TC      | ACGA                    | GCACCT | AAA   | T   | TC | A       | A | ACAC     | AA   |    |
| Coelacanth1   | TCCA            | GCACCTT | TC      | ATGA                    | GCACCT | AAA   | T   | TC | A       | A | ACAC     | AA   |    |
| Coelacanth2   | AGCA            | GCACCTT | TT      | ACGA                    | GCACCT | AAA   | T   | TC | A       | A | TAAA     | AA   |    |
| Coelacanth3   | TCCA            | GCACCTT | TC      | ACGA                    | GCACCT | AAA   | T   | TT | A       | A | ATGC     | AA   |    |
| Coelacanth4   | TCTG            | GCACCTT | TC      | ACGA                    | GCACCT | AAA   | T   | TC | A       | A | ACAC     | AC   |    |
| Coelacanth5   | TCCA            | GCACCTT | TC      | ACGA                    | GCACCT | AAA   | T   | TC | A       | A | ATGC     | AA   |    |
| Coelacanth6   | TCTG            | GCACCTT | TC      | ATGA                    | GCACCT | AAA   | T   | TC | A       | A | ATAA     | AA   |    |
| Coelacanth7   | TCTA            | GCACCTT | TC      | ACTA                    | GCACCT | AAA   | T   | TC | A       | A | ACAA     | AA   |    |
| Coelacanth8   | TCTG            | GCACCTT | TC      | ACGA                    | GCACCT | AAA   | T   | TC | A       | A | ACAC     | AA   |    |
| Coelacanth9   | TCTG            | GCACCTT | TC      | ATGA                    | GCACCT | AAA   | T   | TC | A       | A | ABAA     | AA   |    |
| Coelacanth10  | TCTG            | GCACCTT | TC      | ATGA                    | GCACCT | AAA   | T   | TC | A       | A | ACAA     | AA   |    |
| Coelacanth11  | TCCA            | GCACCTT | TC      | ACGA                    | GCACCT | AAA   | T   | TC | A       | A | ACAC     | AA   |    |
| Coelacanth12  | TCCA            | GCACCTT | TC      | ACGA                    | GCACCT | AAA   | T   | TC | A       | A | ACAA     | AA   |    |
| Coelacanth13  | GCA             | GCACCTT | TC      | ACGA                    | GCACCT | AAA   | T   | TC | A       | A | TTAA     | AA   |    |
| Coelacanth14  | G               | GCACCTT | TT      | GTGA                    | GCACCT | GTA   | T   | TC | A       | A | GAAA     | AA   |    |
| Coelacanth15  | TCTG            | GCACCTT | TC      | ATGA                    | GCACCT | ACT   | ACA | T  | TC      | A | T        | TAAA | AA |
| Coelacanth16  | TCCA            | GCACCTT | TC      | ATGA                    | GCACCT | AAG   | T   | TC | A       | A | T        | T    | T  |
| Coelacanth17  | TCTG            | GCACCTT | TC      | ACGA                    | GCACCT | AAA   | T   | TT | A       | C | TAAA     | AA   |    |
| Coelacanth18  | TCTT            | GC      |         |                         |        |       |     |    |         |   |          |      |    |
| Coelacanth19  | TCTA            | GCACCTT | TC      | AAGA                    | GTCTT  | AAA   | T   | TC | A       | A | A        | AA   |    |
| Coelacanth20  | TCTG            | GCACCTT | TC      | ATGT                    | GCACCT | AAA   | T   | TC | A       | A | ACAC     | AC   |    |
| Coelacanth21  | TCTG            | GCACCTT | TC      | ATGA                    | GCACCT | AAG   | TT  | TC | A       | A | ACAA     | AA   |    |
| Coelacanth22  | TCCA            | GAACCTT | TC      | GCCA                    | GCACCT | AAA   | T   | TC | A       | T | ACACTTTA |      |    |
| Coelacanth23  | TCTG            | GCACCTT | TC      | CATA                    | GCACCT | AAA   | T   | TC | A       | T | TTTA     | AA   |    |
| Coelacanth24  | TCTG            | GCACATC | TC      | TCAA                    |        |       |     |    |         |   | AA       | AA   |    |
| Coelacanth25  | TCCA            | GCACCTT | TC      | ACAA                    | GCATT  | AAG   | T   | TC | G       | A | AT       |      |    |
| Coelacanth26  | TCTG            | ACACCTT | TC      | TTCG                    | GCACCT | AGA   | T   | TC | A       | T | TAAA     | AG   |    |
| Coelacanth27  | TCCA            | GCACCTT | TC      | ATGA                    | GCATT  | AAGCT | T   | TC | A       | A | AGAG     | GAT  |    |
| Coelacanth28  | TCA             | ACACCTT | TC      | ATGA                    | GCACCT | AAA   | T   | GT | A       | A |          |      |    |
| Coelacanth29  | TCTG            | GCACCTT | TC      | ATGA                    | GCACCT | AAG   | T   | TC | A       | A | ACAA     | AA   |    |
| Coelacanth30  | TCTG            | CTATGTT | CA      | AAGA                    | GCACCT | AAA   | G   | TC | A       | A | TAAA     | AC   |    |
| Coelacanth31  | TCTT            | GAACCTT | TC      | ATTA                    | TCACCT | AAG   | T   | TC | A       | A | TAAA     | A    |    |
| Coelacanth32  | TCCA            | ACTCCTT | TC      | ACGA                    | ACAC   | AAA   | T   | TC | A       | A | TAAA     | AA   |    |
| Coelacanth33  |                 | ACCTT   | TC      | ATCA                    | GCATT  | TAG   | T   | TC | C       | C | CC       | CC   |    |
| Coelacanth34  | TCTG            | ATACCTT | TT      | AAAA                    | GCACCT | AAG   | C   | TC | A       | A | A        | A    |    |
| Coelacanth35  | TCTT            | GTATCTT | TC      | ATAA                    | GCACCT | AAG   | T   | TC | A       | A | CAT      | AA   |    |
| Coelacanth36  | TCTG            | GCACCTT | TC      | ACGA                    | GCACCT | GAA   | T   | TC | G       | A | ACAG     | AA   |    |
| Coelacanth37  |                 |         |         |                         |        |       |     |    |         |   |          |      |    |
| Coelacanth38  | TCCA            | GCACCTT | TC      | ACTA                    | GCACCT | AAA   | T   | TC | A       | G |          |      |    |
| Coelacanth39  | AGT             | GCACCAC | AC      | AGCT                    | GTTTT  | AAA   | C   | TC | A       | T | ACAA     | AA   |    |
| Coelacanth40  | TGGA            | AAACCT  |         |                         |        |       |     |    |         |   |          |      |    |
| Coelacanth41  | TAAA            | GC      |         |                         |        |       |     |    |         |   |          |      |    |
| Coelacanth42  | TCTG            | ACACCTT | TC      | ATAA                    | GCACC  | AAG   | T   | TC | TCTCAAG | G | CGAA     | TG   |    |
| Coelacanth43  | ATCC            | GTGCCCT | TC      | ACAA                    | AGAGT  | A     |     |    |         |   |          |      |    |
| Coelacanth44  | TCCA            | GCACCTT | TC      | ATGA                    | ATAT   | AAA   | T   | TC | A       | A | A        | A    |    |
| Coelacanth45  | TCCA            | GCACCTT | TC      | ATCA                    | GCACCT | AAA   | T   | TC | A       | A |          |      |    |
| Coelacanth46  | TCTC            | TCATTTT | TC      | ATGA                    | GCACCT | GAA   | T   | TC | A       | A | CATT     | TG   |    |
| Coelacanth47  | TCTC            | TCACCTT | TC      | CAGA                    | GACGT  | TAC   | C   | CC | G       | T | AGC      | TT   |    |
| Coelacanth48  | TCCC            | TCATCTT | TG      | CAAA                    | CTCCT  | AAA   | T   | TC | A       | T | ACCA     | AA   |    |
| Coelacanth49  | GCCA            | GCACCTT | TC      | ACAA                    | GCACCT | AAA   |     |    |         |   |          |      |    |
| Coelacanth50  | TCTG            | GAAATTC | TT      | AGGC                    | GTGCT  | AAA   | T   | TT | A       | C | TATACAA  | AT   |    |
| Coelacanth51  | TCCC            | TCACCTT | TC      | CAAA                    | GAGT   | ACA   | T   | TC | A       | T | AGAT     | TC   |    |
| Coelacanth52  |                 |         |         |                         |        |       |     |    |         |   |          |      |    |
| Coelacanth53  | TCTG            | GTCCTT  | TT      | ACAA                    | ATGT   | ATA   | T   | TC | A       | A |          |      |    |
| Coelacanth54  | TCCC            | TCACCTT | TC      | CAAG                    | GAGT   | ACA   | T   | TC | A       | C | AGAT     | TC   |    |
| Coelacanth55  |                 |         |         |                         |        |       |     |    |         |   |          |      |    |
| Coelacanth56  | CCTG            | GATCCTT | T       |                         |        |       |     |    |         |   |          |      |    |
| Coelacanth57  |                 |         |         |                         |        |       |     |    |         |   |          |      |    |
| Coelacanth58  | TCTG            | GCACCTT | TC      | ACGA                    | GCACCT | AAA   | T   | TC | A       | A | ACAA     | AA   |    |
| OutGroup      | TCCG            | GCACCTT | GTC     | ACCA                    | GCATG  | AAA   | T   | TC | A       | A | ACAA     | AA   |    |
| PCBP2-Human   | TCCG            | GCACCTT | GTC     | ACCA                    | GCATG  | AAA   | T   | TC | A       | A | ACAA     | AA   |    |
| PCBP2-Chimp   | TCCG            | GCACCTT | GTC     | ACCA                    | GCATG  | AAA   | T   | TC | A       | A | ACAA     | AA   |    |
| PCBP2-Dog     | TCCG            | GCACCTT | GTC     | ACCA                    | GCATG  | AAA   | T   | TC | A       | A | ACAA     | AA   |    |
| PCBP2-Mouse   | TCCG            | GCACCTT | GTC     | ACCA                    | GCATG  | AAA   | T   | TC | A       | A | ACAA     | AA   |    |
| PCBP2-Rat     | TCCG            | GCACCTT | GTC     | ACCA                    | GCATG  | AAA   | T   | TC | A       | A | ACAA     | AA   |    |
| PCBP2-Opossum | TCCG            | GCACCTT | GTC     | ACCA                    | GCATG  | AAA   | T   | TC | A       | A | ACAA     | AA   |    |
| ISL1-Human    | TTTGCACAAACAGAT | GTAGTCT | TC      | ACTAATGATAAAAAGGCTATACT | AAA    | C     | TC  |    | A       | A | ACAG     | CA   |    |
| ISL1-Chimp    | TTTGCACAAACAGAT | GTAGTCT | TC      | ACTAATGATAAAAAGGCTATACT | AAA    | C     | TC  |    | A       | A | ACAG     | CA   |    |
| ISL1-Dog      | TGCACAAACAGAC   | ATAGTCT | CC      | ACTA                    | ATACT  | AAA   |     |    |         |   |          |      |    |
| ISL1-Mouse    | CCTG            | GAAAGT  | CC      | A                       | ACT    | CAA   | C   | TC | A       | A | ATAG     | CA   |    |
| ISL1-Rat      |                 |         |         |                         |        |       |     |    |         |   |          |      |    |
| ISL1-Opossum  |                 | TT      | TC      | ACAA                    | GCA    |       |     |    |         |   |          |      |    |
| ISL1-Chicken  |                 |         |         |                         |        |       |     |    |         |   |          |      |    |
| ISL1-Frog     |                 |         |         |                         |        |       |     |    |         |   |          |      |    |
| DACH1-Human   | TTTGG           | GCACCTT | GCTTGAT | GGA                     | GCCCT  | GAA   | T   | CT | A       | G | TTAA     | AA   |    |
| DACH1-Chimp   | TTTGG           | GCACCTT | GCTTGAT | GGA                     | GCCCT  | GAA   | T   | CT | A       | G | TTAA     | AA   |    |
| DACH1-Dog     | TTTGG           | GCACCTT | GCTTGAT | GGA                     | GCCCT  | GAA   | T   | CT | A       | G | TTAA     | AA   |    |
| DACH1-Mouse   |                 |         |         |                         |        |       |     |    |         |   |          |      |    |
| DACH1-Rat     |                 |         |         |                         |        |       |     |    |         |   |          |      |    |
| DACH1-Opossum | CCTG            | GCACCTT | TCTTGAT | GGA                     | GCACCT | GAA   | T   | CC | A       | C | TTAA     | AA   |    |

Figure S14: LF-SINE reconstruction (contd).

|               |           |            |           |             |
|---------------|-----------|------------|-----------|-------------|
| LF-SINE       | . . . . . | TTTAAAAAAA | . . . . . | AAAAAAAAAA  |
| LF-SINE2      | . . . . . | TTTAAAAAAA | . . . . . | AAAAAAAAAA  |
| Coelacanth0   | . . . . . | TTTAAAAAAA | . . . . . | AAAAAAAAAA  |
| Coelacanth1   | . . . . . | TTTAAAAAAA | . . . . . | AAAAAAAAAA  |
| Coelacanth2   | . . . . . | TTTAAAAAAA | . . . . . | TTTAAAGAAA  |
| Coelacanth3   | . . . . . | TGCAAGATA  | . . . . . | CAGAA       |
| Coelacanth4   | . . . . . | TTAAAAA    | . . . . . | AAAAAAAAA   |
| Coelacanth5   | . . . . . | TTAAAAA    | . . . . . | AAAAAAAAA   |
| Coelacanth6   | . . . . . | TTAAAAA    | . . . . . | GTGAGTAA    |
| Coelacanth7   | . . . . . | TGTA       | . . . . . | AAAAAAAAA   |
| Coelacanth8   | . . . . . | CTGAGAAAA  | . . . . . | AATCAATTAAA |
| Coelacanth9   | . . . . . | AGCAAA     | . . . . . | TATGAG      |
| Coelacanth10  | . . . . . | GTAAAAAAG  | . . . . . | TGAA        |
| Coelacanth11  | . . . . . | TTAAAAAAA  | . . . . . | AAAAAAA     |
| Coelacanth12  | . . . . . | CTGAAAAAA  | . . . . . | AAAAAAAAAA  |
| Coelacanth13  | . . . . . | CAAGGATTA  | . . . . . | TAAAAAGGA   |
| Coelacanth14  | . . . . . | TTAAAGAA   | . . . . . | AAAAAAAAAA  |
| Coelacanth15  | . . . . . | TTAAAAAAA  | . . . . . | AAAAAAAAAA  |
| Coelacanth16  | . . . . . | TTAAAAAAA  | . . . . . | AAAAAAAAAA  |
| Coelacanth17  | . . . . . | TTAAAAAAA  | . . . . . | AAAAAAAAAA  |
| Coelacanth18  | . . . . . | TTAAAAAAA  | . . . . . | AAAAAAAAAA  |
| Coelacanth19  | . . . . . | CAATCAAAA  | . . . . . | AAAAAAAAAA  |
| Coelacanth20  | . . . . . | TTAAAAAAA  | . . . . . | AAAAAAAAAA  |
| Coelacanth21  | . . . . . | TTAAAAAAA  | . . . . . | AAAAAAAAAA  |
| Coelacanth22  | . . . . . | CTAAAAA    | . . . . . | AGCAA       |
| Coelacanth23  | . . . . . | TTAAAAAAG  | . . . . . | AAAAA       |
| Coelacanth24  | . . . . . | TTAAAAAAG  | . . . . . | AAAAA       |
| Coelacanth25  | . . . . . | TTAAAAAAG  | . . . . . | AAAAA       |
| Coelacanth26  | . . . . . | TTAAAAAAG  | . . . . . | AAAAA       |
| Coelacanth27  | . . . . . | TTAAAAAAG  | . . . . . | AAAAA       |
| Coelacanth28  | . . . . . | TTAAAAAAG  | . . . . . | AAAAA       |
| Coelacanth29  | . . . . . | TTAAAAAAG  | . . . . . | AAAAA       |
| Coelacanth30  | . . . . . | TTAAAAAAG  | . . . . . | AAAAA       |
| Coelacanth31  | . . . . . | TTAAAAAAG  | . . . . . | AAAAA       |
| Coelacanth32  | . . . . . | TTAAAAAAG  | . . . . . | AAAAA       |
| Coelacanth33  | . . . . . | TTAAAAAAG  | . . . . . | AAAAA       |
| Coelacanth34  | . . . . . | TTAAAAAAG  | . . . . . | AAAAA       |
| Coelacanth35  | . . . . . | TTAAAAAAG  | . . . . . | AAAAA       |
| Coelacanth36  | . . . . . | TTAAAAAAG  | . . . . . | AAAAA       |
| Coelacanth37  | . . . . . | TTAAAAAAG  | . . . . . | AAAAA       |
| Coelacanth38  | . . . . . | TTAAAAAAG  | . . . . . | AAAAA       |
| Coelacanth39  | . . . . . | TTAAAAAAG  | . . . . . | AAAAA       |
| Coelacanth40  | . . . . . | TTAAAAAAG  | . . . . . | AAAAA       |
| Coelacanth41  | . . . . . | TTAAAAAAG  | . . . . . | AAAAA       |
| Coelacanth42  | . . . . . | TTAAAAAAG  | . . . . . | AAAAA       |
| Coelacanth43  | . . . . . | TTAAAAAAG  | . . . . . | AAAAA       |
| Coelacanth44  | . . . . . | TTAAAAAAG  | . . . . . | AAAAA       |
| Coelacanth45  | . . . . . | TTAAAAAAG  | . . . . . | AAAAA       |
| Coelacanth46  | . . . . . | TTAAAAAAG  | . . . . . | AAAAA       |
| Coelacanth47  | . . . . . | TTAAAAAAG  | . . . . . | AAAAA       |
| Coelacanth48  | . . . . . | TTAAAAAAG  | . . . . . | AAAAA       |
| Coelacanth49  | . . . . . | TTAAAAAAG  | . . . . . | AAAAA       |
| Coelacanth50  | . . . . . | TTAAAAAAG  | . . . . . | AAAAA       |
| Coelacanth51  | . . . . . | TTAAAAAAG  | . . . . . | AAAAA       |
| Coelacanth52  | . . . . . | TTAAAAAAG  | . . . . . | AAAAA       |
| Coelacanth53  | . . . . . | TTAAAAAAG  | . . . . . | AAAAA       |
| Coelacanth54  | . . . . . | TTAAAAAAG  | . . . . . | AAAAA       |
| Coelacanth55  | . . . . . | TTAAAAAAG  | . . . . . | AAAAA       |
| Coelacanth56  | . . . . . | TTAAAAAAG  | . . . . . | AAAAA       |
| Coelacanth57  | . . . . . | TTAAAAAAG  | . . . . . | AAAAA       |
| Coelacanth58  | . . . . . | TTAAAAAAG  | . . . . . | AAAAA       |
| OutGroup      | . . . . . | TTTAAAAAAA | . . . . . | AAAAA       |
| PCBP2-Human   | . . . . . | TTTAAAAAAA | . . . . . | AAAAA       |
| PCBP2-Chimp   | . . . . . | TTTAAAAAAA | . . . . . | AAAAA       |
| PCBP2-Dog     | . . . . . | TTTAAAAAAA | . . . . . | AAAAA       |
| PCBP2-Mouse   | . . . . . | TTTAAAAAAA | . . . . . | AAAAA       |
| PCBP2-Rat     | . . . . . | TTTAAAAAAA | . . . . . | AAAAA       |
| PCBP2-Opossum | . . . . . | TTTAAAAAAA | . . . . . | AAAAA       |
| ISL1-Human    | . . . . . | TTTAAAAAAA | . . . . . | AAAAA       |
| ISL1-Chimp    | . . . . . | TTTAAAAAAA | . . . . . | AAAAA       |
| ISL1-Dog      | . . . . . | TTTAAAAAAA | . . . . . | AAAAA       |
| ISL1-Mouse    | . . . . . | TTTAAAAAAA | . . . . . | AAAAA       |
| ISL1-Rat      | . . . . . | TTTAAAAAAA | . . . . . | AAAAA       |
| ISL1-Opossum  | . . . . . | TTTAAAAAAA | . . . . . | AAAAA       |
| ISL1-Chicken  | . . . . . | TTTAAAAAAA | . . . . . | AAAAA       |
| ISL1-Frog     | . . . . . | TTTAAAAAAA | . . . . . | AAAAA       |
| DACH1-Human   | . . . . . | TTTAAAAAAA | . . . . . | AAAAA       |
| DACH1-Chimp   | . . . . . | TTTAAAAAAA | . . . . . | AAAAA       |
| DACH1-Dog     | . . . . . | TTTAAAAAAA | . . . . . | AAAAA       |
| DACH1-Mouse   | . . . . . | TTTAAAAAAA | . . . . . | AAAAA       |
| DACH1-Rat     | . . . . . | TTTAAAAAAA | . . . . . | AAAAA       |
| DACH1-Opossum | . . . . . | TTTAAAAAAA | . . . . . | AAAAA       |

Figure S14: LF-SINE reconstruction (contd).

LF-SINE  
 chr12 52144728 52145086  
 chr13 72039313 72039725  
 chr19 11005348 11005761  
 chr7 86458756 86459017  
 chr2 206851072 206851328  
 chr5 51061598 51061986  
 chr12 23491081 23491360  
 chr1 83575654 83576006  
 chr5 145869803 145870166  
 chr2 199048840 199049026  
 chr3 174791824 174792279  
 chr14 30058106 30058454  
 chr7 76128430 76128728  
 chr2 171372544 171372906  
 chr3 60916212 80916621  
 chr6 133323563 133323990  
 chr1 88697679 88698095  
 chr5 130803443 130803849  
 chr2 190722538 190722870  
 chr12 64912202 64912645  
 chr3 81227680 81228121  
 chr6 69757015 69757246  
 chr4 183287752 183288178  
 chr10 8098886 8099072  
 chr17 72228877 72229141  
 chr5 58756501 58756821  
 chr5 31209408 31209910  
 chr9 29899173 29899415  
 chr1 97715824 97716065  
 chr8 8404055 8404358  
 chr12 25855843 25856247  
 chr5 87380837 87381216  
 chr9 23993410 23993632  
 chr3 25634497 25634838  
 chr13 55929988 55930216  
 chr8 21268995 21269350  
 chr10 114221897 114222268  
 chr1 103819841 103820022  
 chr5 145476419 145476862  
 chr3 147829102 147829546  
 chr1 214031738 214032057  
 chr5 115918408 115918720  
 chr14 26513056 26513439  
 chr10 87362750 87362993  
 chr5 87850888 87851264  
 chr2 175782720 175782878  
 chr4 146018405 146018752  
 chr8 122399444 122399846  
 chr14 33229348 33229488  
 chr9 17331332 17331705

LF-SINE  
 chr12 52144728 52145086  
 chr13 72039313 72039725  
 chr19 11005348 11005761  
 chr7 86458756 86459017  
 chr2 206851072 206851328  
 chr5 51061598 51061986  
 chr12 23491081 23491360  
 chr1 83575654 83576006  
 chr5 145869803 145870166  
 chr2 199048840 199049026  
 chr3 174791824 174792279  
 chr14 30058106 30058454  
 chr7 76128430 76128728  
 chr2 171372544 171372906  
 chr3 60916212 80916621  
 chr6 133323563 133323990  
 chr1 88697679 88698095  
 chr5 130803443 130803849  
 chr2 190722538 190722870  
 chr12 64912202 64912645  
 chr3 81227680 81228121  
 chr6 69757015 69757246  
 chr4 183287752 183288178  
 chr10 8098886 8099072  
 chr17 72228877 72229141  
 chr5 58756501 58756821  
 chr5 31209408 31209910  
 chr9 29899173 29899415  
 chr1 97715824 97716065  
 chr8 8404055 8404358  
 chr12 25855843 25856247  
 chr5 87380837 87381216  
 chr9 23993410 23993632  
 chr3 25634497 25634838  
 chr13 55929988 55930216  
 chr8 21268995 21269350  
 chr10 114221897 114222268  
 chr1 103819841 103820022  
 chr5 145476419 145476862  
 chr3 147829102 147829546  
 chr1 214031738 214032057  
 chr5 115918408 115918720  
 chr14 26513056 26513439  
 chr10 87362750 87362993  
 chr5 87850888 87851264  
 chr2 175782720 175782878  
 chr4 146018405 146018752  
 chr8 122399444 122399846  
 chr14 33229348 33229488  
 chr9 17331332 17331705

Figure S15: Human instances of the LF-SINE. Alignment of the 50 most conserved human instances to the coelacanth LF-SINE. Notice that multiple instances match each portion of the SINE, and that several instances span nearly its entire length.



LF-SINE

```

chr12_52144728_52145086  . . . . . CACAT . . . . .
chr13_72039313_72039725  . . . . . CACAG . . . . .
chr19_11005348_11005761  . . . . . CACAG . . . . .
chr7_86458756_86459017  . . . . . CACAG . . . . .
chr2_206851072_206851328  . . . . . CACAT . . . . .
chr15_51061598_51061986  . . . . . CACAT . . . . .
chr12_23491081_23491360  . . . . . CACAT . . . . .
chr1_83575654_83576006  . . . . . CACAT . . . . .
chr5_145869803_145870166  . . . . . CACAT . . . . .
chr2_199048840_199049026  . . . . . CACAT . . . . .
chr3_174791824_174792279  . . . . . CACAT . . . . .
chr14_30058106_30058454  . . . . . CACAT . . . . .
chr7_76128430_76128728  . . . . . CACAT . . . . .
chr2_171372544_171372906  . . . . . CACAT . . . . .
chr3_80916212_80916621  . . . . . CACAT . . . . .
chr6_133323563_133323990  . . . . . CACAT . . . . .
chr1_88697679_88698095  . . . . . CACAT . . . . .
chr5_130803443_130803849  . . . . . CACAT . . . . .
chr2_190722538_190722870  . . . . . CACAT . . . . .
chr12_64912202_64912645  . . . . . CACAT . . . . .
chr3_81227680_81228121  . . . . . CACAT . . . . .
chr6_69757015_69757246  . . . . . CACAT . . . . .
chr4_183287752_183288178  . . . . . CACAT . . . . .
chr10_80988886_8099072  . . . . . CACAT . . . . .
chr17_72228877_72229141  . . . . . CACAT . . . . .
chr15_58756501_58756821  . . . . . CACAT . . . . .
chr5_31209408_31209910  . . . . . CACAT . . . . .
chr9_29899173_29899415  . . . . . CACAT . . . . .
chr1_97715824_97716065  . . . . . CACAT . . . . .
chr10_8404055_8404358  . . . . . CACAT . . . . .
chr12_25855843_25856247  . . . . . CACAT . . . . .
chr5_87380837_87381216  . . . . . CACAT . . . . .
chr9_23993410_23993632  . . . . . CACAT . . . . .
chr3_25634497_25634838  . . . . . CACAT . . . . .
chr13_55929988_55930216  . . . . . CACAT . . . . .
chr18_21268995_21269350  . . . . . CACAT . . . . .
chr10_114221897_114222268  . . . . . CACAT . . . . .
chr5_103819841_103820022  . . . . . CACAT . . . . .
chr5_145476419_145476862  . . . . . CACAT . . . . .
chr3_147829102_147829546  . . . . . CACAT . . . . .
chr1_214031738_214032057  . . . . . CACAT . . . . .
chr5_115918408_115918720  . . . . . CACAT . . . . .
chr14_26513056_26513439  . . . . . CACAT . . . . .
chr10_87362750_87362993  . . . . . CACAT . . . . .
chr5_87850888_87851264  . . . . . CACAT . . . . .
chr2_175782720_175782878  . . . . . CACAT . . . . .
chr4_146018405_146018752  . . . . . CACAT . . . . .
chr8_122399444_122399846  . . . . . CACAT . . . . .
chr14_33229348_33229488  . . . . . CACAT . . . . .
chr9_17331332_17331705  . . . . . CACAT . . . . .

```

LF-SINE

```

chr12_52144728_52145086  . . . . . CACAT . . . . .
chr13_72039313_72039725  . . . . . CACAG . . . . .
chr19_11005348_11005761  . . . . . CACAG . . . . .
chr7_86458756_86459017  . . . . . CACAG . . . . .
chr2_206851072_206851328  . . . . . CACAT . . . . .
chr15_51061598_51061986  . . . . . CACAT . . . . .
chr12_23491081_23491360  . . . . . CACAT . . . . .
chr1_83575654_83576006  . . . . . CACAT . . . . .
chr5_145869803_145870166  . . . . . CACAT . . . . .
chr2_199048840_199049026  . . . . . CACAT . . . . .
chr3_174791824_174792279  . . . . . CACAT . . . . .
chr14_30058106_30058454  . . . . . CACAT . . . . .
chr7_76128430_76128728  . . . . . CACAT . . . . .
chr2_171372544_171372906  . . . . . CACAT . . . . .
chr3_80916212_80916621  . . . . . CACAT . . . . .
chr6_133323563_133323990  . . . . . CACAT . . . . .
chr1_88697679_88698095  . . . . . CACAT . . . . .
chr5_130803443_130803849  . . . . . CACAT . . . . .
chr2_190722538_190722870  . . . . . CACAT . . . . .
chr12_64912202_64912645  . . . . . CACAT . . . . .
chr3_81227680_81228121  . . . . . CACAT . . . . .
chr6_69757015_69757246  . . . . . CACAT . . . . .
chr4_183287752_183288178  . . . . . CACAT . . . . .
chr10_80988886_8099072  . . . . . CACAT . . . . .
chr17_72228877_72229141  . . . . . CACAT . . . . .
chr15_58756501_58756821  . . . . . CACAT . . . . .
chr5_31209408_31209910  . . . . . CACAT . . . . .
chr9_29899173_29899415  . . . . . CACAT . . . . .
chr1_97715824_97716065  . . . . . CACAT . . . . .
chr10_8404055_8404358  . . . . . CACAT . . . . .
chr12_25855843_25856247  . . . . . CACAT . . . . .
chr5_87380837_87381216  . . . . . CACAT . . . . .
chr9_23993410_23993632  . . . . . CACAT . . . . .
chr3_25634497_25634838  . . . . . CACAT . . . . .
chr13_55929988_55930216  . . . . . CACAT . . . . .
chr18_21268995_21269350  . . . . . CACAT . . . . .
chr10_114221897_114222268  . . . . . CACAT . . . . .
chr5_103819841_103820022  . . . . . CACAT . . . . .
chr5_145476419_145476862  . . . . . CACAT . . . . .
chr3_147829102_147829546  . . . . . CACAT . . . . .
chr1_214031738_214032057  . . . . . CACAT . . . . .
chr5_115918408_115918720  . . . . . CACAT . . . . .
chr14_26513056_26513439  . . . . . CACAT . . . . .
chr10_87362750_87362993  . . . . . CACAT . . . . .
chr5_87850888_87851264  . . . . . CACAT . . . . .
chr2_175782720_175782878  . . . . . CACAT . . . . .
chr4_146018405_146018752  . . . . . CACAT . . . . .
chr8_122399444_122399846  . . . . . CACAT . . . . .
chr14_33229348_33229488  . . . . . CACAT . . . . .
chr9_17331332_17331705  . . . . . CACAT . . . . .

```

Figure S15: Human instances of the LF-SINE (contd).





```

LF-SINE
chr12_52144728_52145086      .C.....AC.....E...AAATTCA.....CAC...AAAA...A.....AA.....TTTAAAAAAAAAAAAAAAAAAAA
chr13_72039313_72039725      .C.....AC.....G...AAATTCA.....CAC...AAAA...A.....AA.....GT
chr19_11005348_11005761      .C.....AC.....E...GAATCTA.....OTT...AAAA...A.....AA.....TTTAAAGTAAAAAGCA
chr7_86458756_86459017      .C.....AC.....E...AAATCCA.....GTA...AAAA...A.....AA.....AAAGGAACTAAACACACCA
chr2_206851072_206851328    .G.....AC.....A...AA...G...AA...AAAA...A.....AA.....TTT
chr15_51061598_51061986     .A.....AT.....C...AAATTC.....CAT...TTTG...G.....AA.....TTT
chr5_145869803_145870166    TTG.....AC.....E...AAATTC.....GTT...ATTA...A.....AA.....GAGAGGATTAAG
chr2_199048840_199049026    .G.....AC.....E...AAATTC.....GTT...ATTA...A.....AA.....TTT
chr3_174791824_174792279    .CATGAGCAAC.....E...CAATCA.....CAC...AAAA...A.....AG...CTTAAAGCA
chr14_30058106_30058454     .G.....AC.....E...AAATTC.....CAC...AAAA...A.....AA.....TTT
chr7_76128430_76128728     .T.....CG.....TCTCTTCTCTG...GAG...AT...A.....AC.....GGGCA
chr2_171372544_171372906    .T.....CG.....E...CAATTC.....TCG...ATTA...G.....AC.....GGGCA
chr3_80916212_80916621     .T.....CG.....E...TAAATGC.....ATC...AAAT...G.....AA.....TTT
chr6_133323563_133323990    .T.....AC.....E...AAA.....AA.....A.....AA.....TTT
chr1_88697679_88698095     .C.....AC.....E...AAATTC.....CAC...TTCA...G.....CA...GAGAACTAAACACAGAAAA
chr5_130803443_130803849    .G.....AC.....E...AAATTC.....GCA...AGTA...A.....AA.....TTT
chr2_190722538_190722870    .G.....AG.....C...CCCACC.....GTA...AAAA...C.....AT...TTGAAAACAAAAGCA
chr12_64912202_64912645    .G.....AG.....C...CAATTC.....TTT...AAAA...A.....AT...TTGAAAACAAAAGCA
chr3_81227680_81228121     .C.....AG.....GAG...AGGCGA.....ACG...TAG...G.....AA...ATTAA
chr6_69757015_69757246     .C.....AG.....GAG...AGGCGA.....ACG...TAG...G.....AA...ATTAA
chr4_183287752_183288178    .A.....ACTGAAGGTAT...AAATTC.....ATT...GGGA...A...TAAATGCTCCTAGGTAAGAAAAAGAAACA
chr10_8098886_8099072      .C.....TC.....A...AAATTC.....CAC...CGAC...A...AC...AGCAAGCAAGAAACAA
chr5_31209408_31209910     .G.....AC.....A...AAA...G...CA...AGC...A...GT...CTTAAAGAAAAGAAAAACA
chr9_29899173_29899415     .G.....AC.....A...AAA...G...CA...AGC...A...GT...CTTAAAGAAAAGAAAAACA
chr1_97715824_97716065     .G.....AC.....A...AAA...G...CA...AGC...A...GT...CTTAAAGAAAAGAAAAACA
chr10_8404055_8404358      .G.....AC.....E...AAATTC.....CAC...AAAA...A.....AA.....TTT
chr12_25855843_25856247    .C.....AC.....E...AAATTC.....CAC...AAAA...A.....AA.....TTT
chr5_87380837_87381216     .C.....AC.....E...AAATTC.....CAC...AAAA...A.....AA.....TTT
chr9_23993410_23993632     .T.....CG.....E...AAATTC.....CAC...AAAA...A.....AA.....TTT
chr3_25634497_25634838     .C.....CG.....E...TAAATTC.....TGT...TTAA...A.....AA...TAATTAAGATTACGAA
chr13_55929988_55930216    .C.....CG.....E...TAAATTC.....TGT...TTAA...A.....AA...TAATTAAGATTACGAA
chr18_21268995_21269350    .C.....CG.....E...TAAATTC.....TGT...TTAA...A.....AA...TAATTAAGATTACGAA
chr10_114221897_114222268  .A.....AT.....E...CTTCTT...GTC...ACTA...A...ATTTGAAAATTAATTAAGCA
chr5_103819841_103820022   .A.....AT.....E...CTTCTT...GTC...ACTA...A...ATTTGAAAATTAATTAAGCA
chr5_145476419_145476862   .G.....AT.....G...AATTCAT...GCG...CTTC...TTTCTTCTCTG...TTTAAATTAAGAAAGAA
chr3_147829102_147829546   .C.....AA.....E...AAATTC.....GTT...TAAA...T.....AA...AAGAAAAGAAAGAAA
chr1_214031738_214032057   .T.....AC.....E...GAATTCAT...CAC...AGAA...A...GT...TTTAAATTAAGAAAGAAA
chr5_115918408_115918720   .G.....CG.....E...GGATTCAGAGATT...CA...AGCA...G...CA...CTGGAGGGGAAAAAAAA
chr14_26513056_26513439    .G.....AT.....G...AATTCAT...GCG...CTTC...TTTCTTCTCTG...TTTAAATTAAGAAAGAA
chr10_87362750_87362993    .C.....AA.....E...AAATTC.....GTT...TAAA...T.....AA...AAGAAAAGAAAGAAA
chr5_87850888_87851264     .T.....AC.....E...GAATTCAT...CAC...AGAA...A...GT...TTTAAATTAAGAAAGAAA
chr2_175782720_175782878   .C.....AA.....E...AAATTC.....GTT...TAAA...T.....AA...AAGAAAAGAAAGAAA
chr4_146018405_146018752   .T.....AC.....E...GAATTCAT...CAC...AGAA...A...GT...TTTAAATTAAGAAAGAAA
chr8_122399444_122399846   .G.....CG.....E...GGATTCAGAGATT...CA...AGCA...G...CA...CTGGAGGGGAAAAAAAA
chr14_33229348_33229488   .G.....CG.....E...GGATTCAGAGATT...CA...AGCA...G...CA...CTGGAGGGGAAAAAAAA
chr9_17331332_17331705     .G.....CG.....E...GGATTCAGAGATT...CA...AGCA...G...CA...CTGGAGGGGAAAAAAAA

```

Figure S15: Human instances of the LF-SINE (contd).

Table S1: Available genomic DNA from the Indonesian coelacanth, *Latimeria menadoensis*.

| Region Of Homology    | BACs     | Non-overlapping Length (bp) | LF-SINE Instances |
|-----------------------|----------|-----------------------------|-------------------|
| Protocadherin Cluster | AC150310 | 609,120                     | 21                |
|                       | AC150283 |                             |                   |
|                       | AC150284 |                             |                   |
|                       | AC150309 |                             |                   |
|                       | AC150308 |                             |                   |
| Hox Cluster           | AC151571 | 187,392                     | 21                |
| Hox Cluster           | AC147788 | 168,364                     | 4                 |
| Genomic               | AC140159 | 92,794                      | 13                |
| Total                 | 8        | 1,057,670                   | 59                |

BACs - bacterial artificial chromosome cloning vectors, listed using their GenBank accessions.

Table S2: Whole genome drafts searched for LF-SINE instances.

| Species                      | UCSC Assembly | LF-SINE Detected | Species                              | UCSC Assembly | LF-SINE Detected |
|------------------------------|---------------|------------------|--------------------------------------|---------------|------------------|
| <i>Homo sapiens</i>          | hg17          | Yes              | <i>Danio rerio</i>                   | danRer2       | No               |
| <i>Pan troglodytes</i>       | panTro1       | Yes              | <i>Tetraodon nigroviridis</i>        | tetNig1       | No               |
| <i>Macaca mulatta</i>        | rheMac1       | Yes              | <i>Takifugu rubripes</i>             | fr1           | No               |
| <i>Mus musculus</i>          | mm6           | Yes              | <i>Ciona intestinalis</i>            | ci1           | No               |
| <i>Rattus norvegicus</i>     | rn3           | Yes              | <i>Strongylocentrotus purpuratus</i> | strPur1       | No               |
| <i>Canis familiaris</i>      | canFam1       | Yes              | <i>Drosophila melanogaster</i>       | dm2           | No               |
| <i>Bos taurus</i>            | bosTau1       | Yes              | <i>Anopheles gambiae</i>             | anoGam1       | No               |
| <i>Monodelphis domestica</i> | monDom1       | Yes              | <i>Caenorhabditis elegans</i>        | ce2           | No               |
| <i>Gallus gallus</i>         | galGal2       | Yes              | <i>Saccharomyces cerevisiae</i>      | sacCer1       | No               |
| <i>Xenopus tropicalis</i>    | xenTro1       | Yes              |                                      |               |                  |

All assemblies are available at <http://genome.ucsc.edu>.

Table S3: Distribution of LF-SINEs in available tetrapod genomes.

| Organism                     | 5' UTR | 3' UTR | Exonic      |       | Intronic | Intergenic | Total |
|------------------------------|--------|--------|-------------|-------|----------|------------|-------|
|                              |        |        | Alt-Spliced | Total |          |            |       |
| <i>Homo sapiens</i>          | 1      | 0      | 12          | 13    | 68       | 163        | 245   |
| <i>Pan troglodytes</i>       | -      | -      | -           | -     | -        | -          | 210   |
| <i>Macaca mulatta</i>        | -      | -      | -           | -     | -        | -          | 229   |
| <i>Canis familiaris</i>      | -      | -      | -           | -     | -        | -          | 235   |
| <i>Bos taurus</i>            | -      | -      | -           | -     | -        | -          | 169   |
| <i>Mus musculus</i>          | 0      | 1      | 7           | 8     | 25       | 57         | 91    |
| <i>Rattus norvegicus</i>     | -      | -      | -           | -     | -        | -          | 87    |
| <i>Monodelphis domestica</i> | -      | -      | -           | -     | -        | -          | 394   |
| <i>Gallus gallus</i>         | 0      | 1      | 2           | 3     | 244      | 451        | 699   |
| <i>Xenopus tropicalis</i>    | 0      | 0      | 1           | 2     | 10       | 14         | 26    |

Assembly names are given in Table S2. Breakdown with respect to protein coding genes is shown in select species for which there is sufficiently independent gene annotation. Also see electronic supplement at <http://www.cse.ucsc.edu/~jill/sine.html>.

Table S4: **LF-SINE** instances in partially sequenced tetrapods.

| Sequences producing High-scoring Segment Pairs:               | High Score | Smallest Sum Probability |   |
|---------------------------------------------------------------|------------|--------------------------|---|
|                                                               |            | P(N)                     | N |
| EM_OV:LC08034 U08034.1 Latimeria chalumnae clone 7 MHC cl...  | 792        | 5.8e-43                  | 3 |
| EM_OV:LC08043 U08043.1 Latimeria chalumnae clone 10 MHC c...  | 700        | 5.8e-35                  | 2 |
| EM_OV:AF131253 AF131253.1 Latimeria chalumnae rhodopsin (...) | 598        | 1.8e-19                  | 1 |
| EM_OV:AC147867 AC147867.3 Gopherus agassizii clone TAMGA-...  | 609        | 2.5e-19                  | 1 |
| EM_OV:AB125532 AB125532.1 Mauremys reevesii DNA, CryIIA S...  | 508        | 3.5e-15                  | 1 |
| EM_OM:AY208121 AY208121.1 Sus scrofa myostatin gene, comp...  | 396        | 1.9e-11                  | 2 |
| EM_OV:AB125431 AB125431.1 Macroclermys temminckii DNA, Cry... | 367        | 9.4e-09                  | 1 |
| EM_OM:AC117941 AC117941.6 Felis catus clone RP86-565015, ...  | 292        | 7.6e-07                  | 2 |
| EM_OV:AF131260 AF131260.1 Latimeria chalumnae RH2 opsin (...) | 314        | 1.1e-06                  | 1 |
| EM_OV:CMDIMIB L42234.1 Chelonia mydas (clone Cm84) DNA re...  | 300        | 2.9e-06                  | 1 |
| EM_OV:AB125486 AB125486.1 Sternotherus odoratus DNA, CryI...  | 282        | 8.5e-05                  | 1 |
| EM_OV:AC147865 AC147865.3 Gopherus agassizii clone TAMGA-...  | 245        | 0.0071                   | 2 |
| EM_OM:AC123971 AC123971.3 Lemur catta clone LB2-255J23, c...  | 262        | 0.031                    | 1 |
| EM_OM:AC124905 AC124905.3 Equus caballus clone CH241-1840...  | 261        | 0.060                    | 2 |

| best hit (gnl ti) | %ident | len. | mis match | gap open | e-value | bit score | #hits <1e-4 | db   | Species                    |
|-------------------|--------|------|-----------|----------|---------|-----------|-------------|------|----------------------------|
| 595468933         | 80.83  | 386  | 40        | 27       | 5e-73   | 283       | >250        | 20G  | Ornithorhynchus anatinus   |
| 819506662         | 79.62  | 373  | 42        | 25       | 1e-62   | 246       | 30          | 5G   | Cavia porcellus            |
| 610716009         | 79.62  | 373  | 41        | 25       | 7e-62   | 244       | 66          | 7G   | Oryctolagus cuniculus      |
| 311856343         | 79.41  | 374  | 40        | 27       | 1e-60   | 239       | 20          | 2G   | Sus scrofa                 |
| 716628186         | 79.14  | 374  | 41        | 27       | 2e-58   | 233       | 60          | 8G   | Echinops telfairi          |
| 717304885         | 79.82  | 342  | 36        | 28       | 8e-57   | 227       | 44          | 5G   | Pongo pygmaeus             |
| 598681119         | 78.88  | 374  | 37        | 31       | 2e-55   | 223       | 91          | 8G   | Dasypus novemcinctus       |
| 477555815         | 78.98  | 352  | 39        | 26       | 3e-53   | 216       | 49          | 8G   | Loxodonta africana         |
| 667813765         | 80.26  | 228  | 28        | 14       | 4e-37   | 162       | 57          | 6G   | Felis catus                |
| 821401047         | 80.69  | 145  | 20        | 7        | 4e-23   | 110       | 4           | 400M | Pongo pygmaeus abelii      |
| 637106021         | 79.29  | 140  | 15        | 12       | 2e-17   | 89.1      | 35          | 33M  | Alligator mississippiensis |
| 343261025         | 78.38  | 111  | 15        | 8        | 4e-11   | 66.1      | 6           | 6M   | Gopherus agassizii         |
| 426822539         | 87.72  | 57   | 5         | 2        | 2e-09   | 68.0      | 21          | 1G   | Otolemur garnettii         |
| 723018327         | 92.31  | 39   | 3         | 0        | 3e-07   | 58.4      | 2           | 219M | Atelerix albiventris       |
| 497806131         | 84.13  | 63   | 6         | 4        | 3e-07   | 60.3      | 4           | 872M | Callithrix jacchus         |
| 645968230         | 82.35  | 68   | 7         | 5        | 4e-07   | 56.4      | 8           | 77M  | Meleagris gallopavo        |
| 130066429         | 81.94  | 72   | 8         | 5        | 6e-07   | 58.4      | 8           | 464M | Papio cynocephalus         |
| 740209113         | 87.50  | 48   | 6         | 0        | 6e-07   | 58.4      | 4           | 536M | Rhinolophus ferrumequinum  |
| 774400718         | 80.82  | 73   | 5         | 9        | 1e-05   | 50.7      | 1           | 50M  | Taeniopygia guttata        |

WU-Blastn hits to the EMBL nucleotide database (top) and Discontiguous Megablast Trace repository hits (bottom) from additional, partially sequenced tetrapods. While the Trace archive covers several tetrapods more extensively than the nucleotide database, it is also highly redundant. Columns 1-7 of the Trace hits table relate to the best hit in that species. The next two columns give the number of hits with  $E$ -value  $<10^{-4}$ , and the total length of the redundant trace reads, respectively.

Table S5: **Chromosomal distribution of LF-SINEs in the human genome.**

| Chromosome | hits | exp   | hits/exp | Chromosome | hits | exp   | hits/exp |
|------------|------|-------|----------|------------|------|-------|----------|
| chr1       | 14   | 19.15 | 0.73     | chr13      | 14   | 8.21  | 1.71     |
| chr2       | 26   | 20.41 | 1.27     | chr14      | 11   | 7.59  | 1.45     |
| chr3       | 18   | 16.72 | 1.08     | chr15      | 9    | 6.99  | 1.29     |
| chr4       | 19   | 16.08 | 1.18     | chr16      | 6    | 6.78  | 0.89     |
| chr5       | 23   | 15.27 | 1.51     | chr17      | 3    | 6.68  | 0.45     |
| chr6       | 13   | 14.38 | 0.90     | chr18      | 13   | 6.41  | 2.03     |
| chr7       | 10   | 13.30 | 0.75     | chr19      | 2    | 4.79  | 0.42     |
| chr8       | 12   | 12.25 | 0.98     | chr20      | 3    | 5.11  | 0.59     |
| chr9       | 12   | 10.12 | 1.19     | chr21      | 3    | 2.94  | 1.02     |
| chr10      | 11   | 11.31 | 0.97     | chr22      | 0    | 2.99  | 0.00     |
| chr11      | 6    | 11.27 | 0.53     | chrX       | 7    | 12.92 | 0.54     |
| chr12      | 10   | 11.19 | 0.89     | chrY       | 0    | 2.14  | 0.00     |

The expected number of hits per chromosome is computed assuming uniform distribution over all sequenced bases of human genome draft hg17. The observed values diverge from this null model (chi-square and simulation  $p \sim 0.01$ ), albeit no single chromosome, except the very short ones, deviates more than two fold from the expected value.

Table S6: **Tetrapodal genes containing an LF-SINE exonized instance.**

| Species | Gene       | Function                                 | Exon |
|---------|------------|------------------------------------------|------|
| M       | PCBP2      | mRNA stability and shuttling             | 9    |
| M       | SMARCA4    | SWI/SNF related matrix associated        | 27   |
| M,C     | EEF1B2     | translation elongation factor            | 3    |
| M       | TCERG1     | transcription factor                     | 22   |
| M       | PTDSR      | promote cell differentiation             | 5    |
| M,C     | RORA       | DNA binding nuclear receptor             | 3    |
| M,C     | GRID1      | neurotransmitter receptor                | 1    |
| M,C     | ATF2       | transcription factor                     | 14   |
| M       | FLJ22833   | nucleic acid binding                     | 4    |
| M       | ARHGAP6    | GTPase activator                         | 13   |
| M,C     | KIAA1409   | unknown                                  | 34   |
| M       | NT5C2      | 5'-nucleotidase                          | 9    |
| M,C,F   | LRP1B      | low density lipoprotein receptor related | 90   |
| M       | DHX30      | unwind double-stranded nucleic acids     | 4    |
| M,C     | gg-DMTF1   | transcription factor                     | 12   |
| C       | gg-PPP2R2C | subunit of protein phosphatase           | 2    |
| C       | gg-SHF1    | subunit of 26S proteasome                | 3    |
| F       | xt-MBNL1   | RNA binding / development                | 4    |
| F       | JGI-49280  | unknown                                  | 5    |

Species: M - Mammals (Human, Mouse, Possum), C - Chicken, F - Frog. Also see Table S7.



Table S7: LF-SINE instances overlapping tetrapodal exons.

| Gene Name  | Sp. | Exon No. | Alt-Spl. | CDS/UTR         | Ins. F.S. | Ins. Stop | Trig. NMD      | ex5' | 3' S.S. Seq. | ex3' | 5' S.S. Seq. |
|------------|-----|----------|----------|-----------------|-----------|-----------|----------------|------|--------------|------|--------------|
| PCBP2      | H   | 9        | +        | C               | -         | -         | -              | 381  | cacagGACAG   | 289  | TAGAGgtgag   |
|            | M   |          | +        | C               | -         | -         | -              | 381  | cacagGACAG   | 289  | TAGAGgtgag   |
| SMARCA4    | H   | 27       | +        | C               | -         | -         | -              | 381  | cacagAGCAG   | 289  | TAAAGgtgag   |
|            | M   |          | +        | C               | -         | -         | -              | 381  | cacagAGCAG   | 289  | TAAAGgtgag   |
| EEF1B2     | H   | 3        | +        | C               | -         | +         | + <sup>a</sup> | 376  | aacagGTAGA   | 101  | TCATAggtgag  |
| TCERG1     | H   | 22       | +        | C               | +         | +         | + <sup>a</sup> | 469  | tatagTTAAT   | 377  | AACAGgtaca   |
|            | M   |          | +        | C               | +         | +         | + <sup>a</sup> | 469  | tatagTTAAT   | 377  | AACAGgtaca   |
| PTDSR      | H   | 5        | +        | C               | +         | +         | +              | 376  | aacagATACA   | 289  | TCGGGgtaag   |
|            | M   |          | +        | C               | +         | +         | +              | 376  | aacagATACA   | 289  | TCGGGgtaag   |
| RORA       | H   | 3        | +        | C               | +         | +         | +              | 366  | cgcagGGCAG   | 289  | AGGTGgtaag   |
|            | M   |          | +        | C               | +         | +         | +              | 366  | cgcagGGCAG   | 289  | AGGTGgtaag   |
| GRID1      | H   | 1        | +        | 5U              |           |           |                |      |              | 289  | GTAGGgtaag   |
| ATF2       | H   | 14       | +        | C               | +         | +         | + <sup>a</sup> | 450  | taaagTGAAT   | 377  | ACCAGgtaca   |
|            | M   |          | +        | 3U <sup>b</sup> |           |           |                |      |              |      |              |
| FLJ22833   | H   | 4        | +        | C               | +         | +         | +              | 381  | cacagTCTAG   | 280  | GTAAGgtaat   |
| ARHGAP6    | H   | 13       | +        | C               | -         | +         | +              | 381  | cccagAACAA   | 289  | TAAGGgtgag   |
|            | M   |          | +        | C               | -         | +         | +              | 381  | cacagAACCA   | 289  | TAAGGgtgag   |
| KIAA1409   | H   | 34       | -        | C               | -         | -         | -              | 381  | cacagAACAG   | 281  | GAGAGgttag   |
|            | M   |          | -        | C               | -         | -         | -              | 381  | cacagAACAG   | 281  | GAGAGgttag   |
|            | C   |          | -        | C               | -         | -         | -              | 381  | cacagAGCAG   | 281  | CAGAGgttag   |
| NT5C2      | H   | 9        | +        | C               | +         | +         | +              | 450  | taaagTGAAT   | 107  | GGATGgtaat   |
|            | M   |          | +        | C               | +         | +         | +              | 450  | taaagTGAAT   | 240  | GGGAGgtttg   |
| LRP1B      | H   | 90       | +        | C               | -         | -         | -              | 381  | tacagGCCAG   | 289  | CTGGGgtgag   |
| DHX30      | H   | 4        | +        | C               | -         | -         | -              | 381  | cccagATCGG   | 289  | TCGAGgtaag   |
| gg-DMTF1   | C   | 12       | +        | C               | +         | +         | +              | 450  | ttagTGAAT    | 377  | AACAGgtaca   |
| gg-PPP2R2C | C   | 2        | +        | C               | +         | +         | +              | 381  | cacagGAGAG   | 289  | TGGAGgtgag   |
| gg-SHFM1   | C   | 3        | +        | 3U <sup>b</sup> |           |           |                |      |              |      |              |
| xt-MBNL1   | F   | 4        | +        | C               | -         | -         | -              | 381  | cacagGCCAG   | 289  | TATGGgtgag   |
| JGI-49280  | F   | 5        | +        | C               | +         | +         | + <sup>a</sup> | 450  | tctagTGATT   | 377  | AACAGgtaaa   |

<sup>a</sup> The very first fully encoded codon is a stop codon.

<sup>b</sup> Instance is embedded inside a larger 3' UTR region.

NMD - nonsense mediated decay. Predicted where the inserted stop codon appears more than 50 nucleotides upstream of the final splice junction (Lewis *et al.*, 2003).

H-Human, M-Mouse, C-Chicken, F-Frog.

All splice region sequences are lowercase when in an intron and uppercase when in a coding region. The numbering of the splice sites corresponds to the first and last coding base of the exon according to the alignments in Fig. S9. Exon number is computed according to the longest annotated transcript in the primary species. As annotation for these genomes improves, more instances of the LF-SINE may be shown to overlap coding exons.

Table S8: Exapted Human LF-SINE splice site distribution.

| SS | Location | Conversion | Changes        | Genes                                                                     |
|----|----------|------------|----------------|---------------------------------------------------------------------------|
| 3' | 366      | TG→AG      | 1              | RORA                                                                      |
| 3' | 376      | AG→AG      | 0              | EEF1B2, PTDSR                                                             |
| 3' | 381      | AG→AG      | 0              | PCBP2, SMARCA4, FLJ22833, ARHGAP6, KIAA1409, LRP1B, DHX30, PPP2R2C, MBNL1 |
| 3' | 450      | TG→AG      | 1              | ATF2, NT5C2, DMTF1, JGI-49280                                             |
| 3' | 469      | TT→AG      | 2 <sup>a</sup> | TCERG1                                                                    |
| 5' | 101      | GAC→AGT    | 3 <sup>a</sup> | EEF1B2                                                                    |
| 5' | 107      | GGT→GGT    | 0              | hg-NT5C2                                                                  |
| 5' | 240      | TGC→GGT    | 2              | mm-NT5C2                                                                  |
| 5' | 280      | GGT→GGT    | 0              | FLJ22833                                                                  |
| 5' | 281      | GGG→GGT    | 1              | KIAA1409                                                                  |
| 5' | 289      | GGT→GGT    | 0              | RORA, PTDSR, PCBP2, SMARCA4, ARHGAP6, LRP1B, DHX30, PPP2R2C, MBNL1        |
| 5' | 377      | GGT→GGT    | 0              | ATF2, DMTF1, JGI-49280, TCERG1                                            |

<sup>a</sup> The perfect mismatch in these cases may suggest that the LF-SINE sequence had diverged in the local region beyond our ability to align it correctly.

The table shows an inverse correlation between the number of mutations necessary to activate a splice site, and the number of characterized instances that use it. The numbering of the splice sites corresponds to the first and last coding bases of the exons according to the alignments in Fig. S9.

Table S9: RNA folding potential of LF-SINE instances.

| Rank   | Orient. | qFrom | qTo | tLength | %GC | MFE     | <i>p</i> -value | Comment            |
|--------|---------|-------|-----|---------|-----|---------|-----------------|--------------------|
| latMen | +       | 1     | 480 | 476     | 47% | -172.30 | 0/10000         | Coelacanth LF-SINE |
| #1     | +       | 103   | 463 | 359     | 57% | -163.10 | 0/10000         | PCBP2 exon         |
| #183   | +       | 55    | 460 | 384     | 47% | -140.40 | 0/10000         | C20orf17 intron    |
| #2     | -       | 1     | 457 | 413     | 47% | -130.40 | 0/10000         |                    |
| #4     | -       | 212   | 481 | 262     | 49% | -102.40 | 1/10000         | AF084530 intron    |
| #13    | -       | 78    | 418 | 299     | 42% | -96.00  | 1/10000         |                    |
| #131   | +       | 5     | 462 | 423     | 36% | -123.90 | 2/10000         | CR749820 intron    |
| #8     | -       | 75    | 463 | 353     | 39% | -98.60  | 3/10000         |                    |
| #117   | -       | 65    | 287 | 208     | 46% | -76.46  | 3/10000         | NAV2 intron        |
| #34    | -       | 68    | 464 | 342     | 42% | -107.89 | 5/10000         | TOP2B intron       |
| #99    | -       | 70    | 348 | 264     | 45% | -85.60  | 5/10000         |                    |
| #152   | -       | 137   | 391 | 238     | 53% | -96.20  | 8/10000         |                    |
| #225   | +       | 58    | 480 | 391     | 36% | -100.20 | 10/10000        |                    |
| #238   | +       | 1     | 288 | 252     | 45% | -81.40  | 10/10000        |                    |
| #47    | +       | 127   | 478 | 348     | 39% | -90.61  | 12/10000        |                    |
| #74    | -       | 24    | 306 | 271     | 41% | -77.40  | 12/10000        |                    |
| #107   | -       | 1     | 458 | 450     | 49% | -146.40 | 13/10000        |                    |
| #102   | +       | 197   | 479 | 280     | 39% | -79.40  | 19/10000        |                    |
| #133   | +       | 20    | 185 | 164     | 37% | -45.41  | 21/10000        |                    |
| #241   | +       | 5     | 253 | 251     | 40% | -70.90  | 25/10000        |                    |
| #138   | +       | 148   | 383 | 232     | 53% | -84.20  | 26/10000        |                    |
| #217   | -       | 18    | 289 | 230     | 43% | -65.40  | 27/10000        |                    |
| #30    | -       | 1     | 362 | 304     | 47% | -95.50  | 30/10000        |                    |
| #179   | +       | 165   | 469 | 281     | 43% | -73.80  | 36/10000        | DPYD intron        |
| #201   | +       | 162   | 477 | 288     | 36% | -73.42  | 38/10000        |                    |
| #37    | -       | 3     | 427 | 372     | 45% | -106.00 | 42/10000        | VTI1A intron       |
| #119   | +       | 41    | 447 | 396     | 42% | -110.08 | 46/10000        |                    |
| #173   | -       | 28    | 358 | 308     | 48% | -94.80  | 51/10000        |                    |
| #96    | +       | 10    | 310 | 269     | 44% | -83.20  | 51/10000        |                    |
| #236   | -       | 118   | 459 | 324     | 34% | -84.73  | 53/10000        |                    |
| #35    | -       | 65    | 295 | 229     | 41% | -61.72  | 53/10000        |                    |
| #243   | +       | 23    | 464 | 408     | 40% | -111.20 | 55/10000        | GRID2 intron       |
| #180   | +       | 130   | 466 | 277     | 41% | -73.49  | 59/10000        | MAP4K3 intron      |
| #151   | +       | 6     | 321 | 282     | 46% | -91.30  | 60/10000        |                    |
| #106   | -       | 45    | 446 | 399     | 48% | -140.10 | 61/10000        |                    |
| #103   | +       | 1     | 160 | 158     | 41% | -48.50  | 65/10000        |                    |
| #9     | +       | 110   | 471 | 364     | 44% | -109.77 | 67/10000        | TCERG1 exon        |
| #129   | -       | 33    | 428 | 374     | 49% | -131.20 | 68/10000        | DNCI1 intron       |
| #209   | +       | 17    | 225 | 198     | 48% | -68.90  | 69/10000        |                    |
| #20    | -       | 52    | 467 | 444     | 47% | -146.40 | 70/10000        | IRAK3 intron       |
| #178   | -       | 71    | 259 | 184     | 48% | -60.20  | 75/10000        |                    |
| #147   | +       | 22    | 448 | 398     | 40% | -108.06 | 76/10000        |                    |
| #156   | +       | 1     | 469 | 426     | 45% | -133.46 | 94/10000        |                    |
| #92    | -       | 62    | 428 | 337     | 42% | -96.00  | 98/10000        | FMR2 intron        |
| #140   | +       | 125   | 428 | 258     | 47% | -85.10  | 98/10000        |                    |

Rank measures how similar the LF-SINE instance is relative to all others, against the coelacanth LF-SINE. Orientation is given for the strand with the lower predicted minimal folding energy (MFE), and is in reference to the LF-SINE sequence. qFrom, qTo give the coordinates of the match with respect to the LF-SINE. tLength, %GC and MFE relate to the human instance. Gene name is provided for all genic instances.
